# Supplementary material for: Rapid Identification of Dipeptidyl Peptidase-IV (DPP-IV) Inhibitory Peptides from Ruditapes philippinarum Hydrolysate
Source: MDPI journal article supplement (doi:10.3390/molecules22101714), 2017-10-13

**Figure captions:**

**Figure S3-1:**  $^1\text{H}$  NMR spectrum of LAPSTM.

**Figure S3-2:**  $^{13}\text{C}$  NMR spectrum, DEPT90 and DEPT135 spectrum of LAPSTM.

**Figure S3-3:** HMBC spectrum of LAPSTM.

**Figure S3-4:** HMQC spectrum of LAPSTM.

**Figure S3-5:** COSY spectrum of LAPSTM.

**Figure S3-6:** ROESY spectrum of LAPSTM.

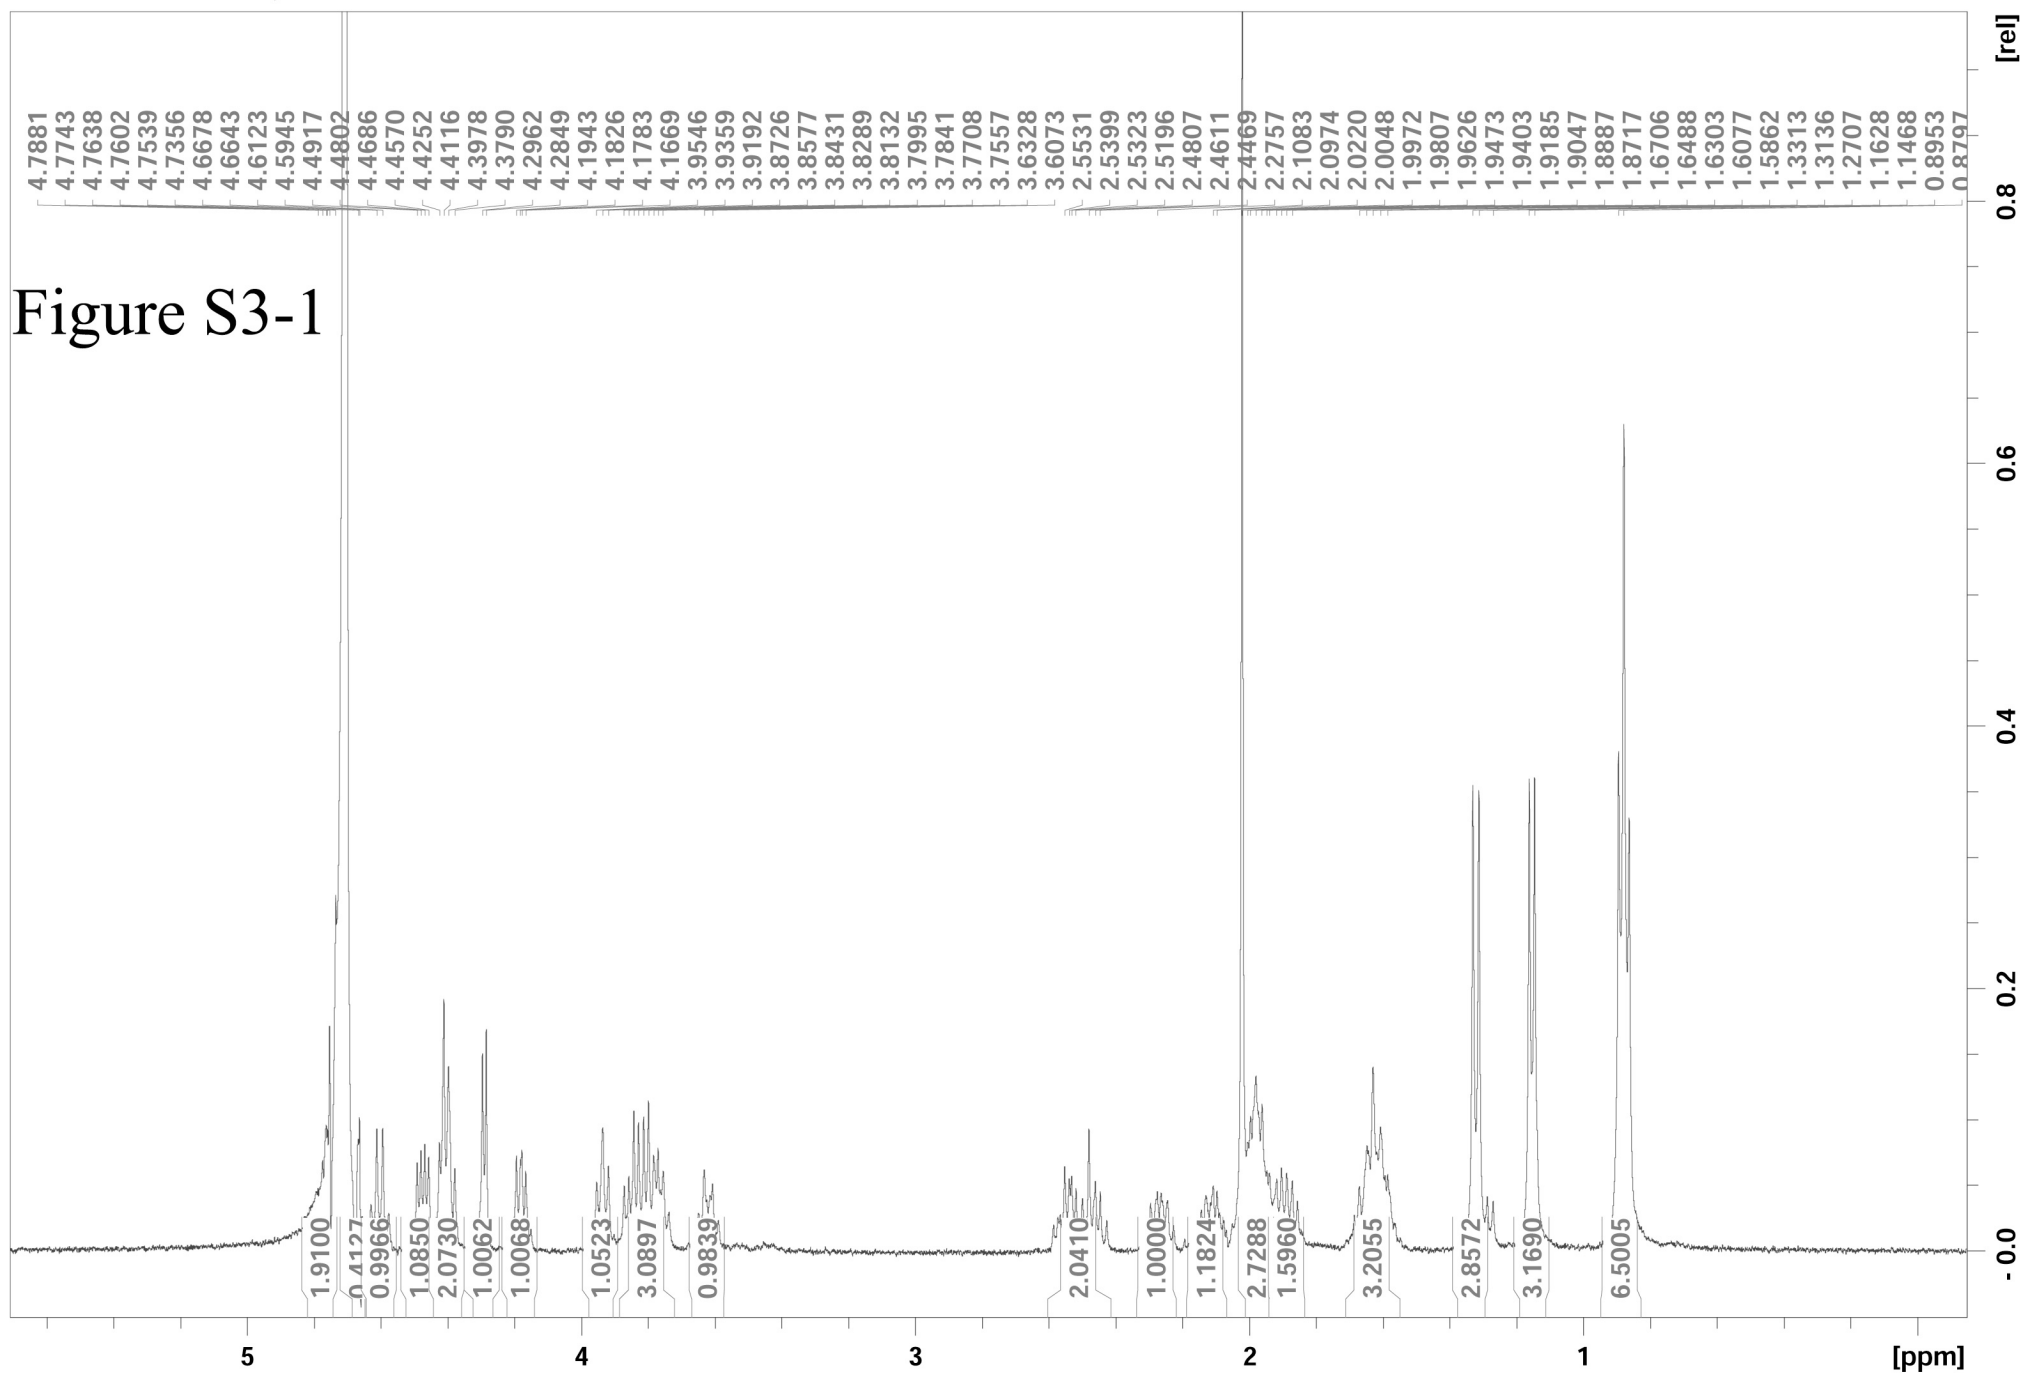

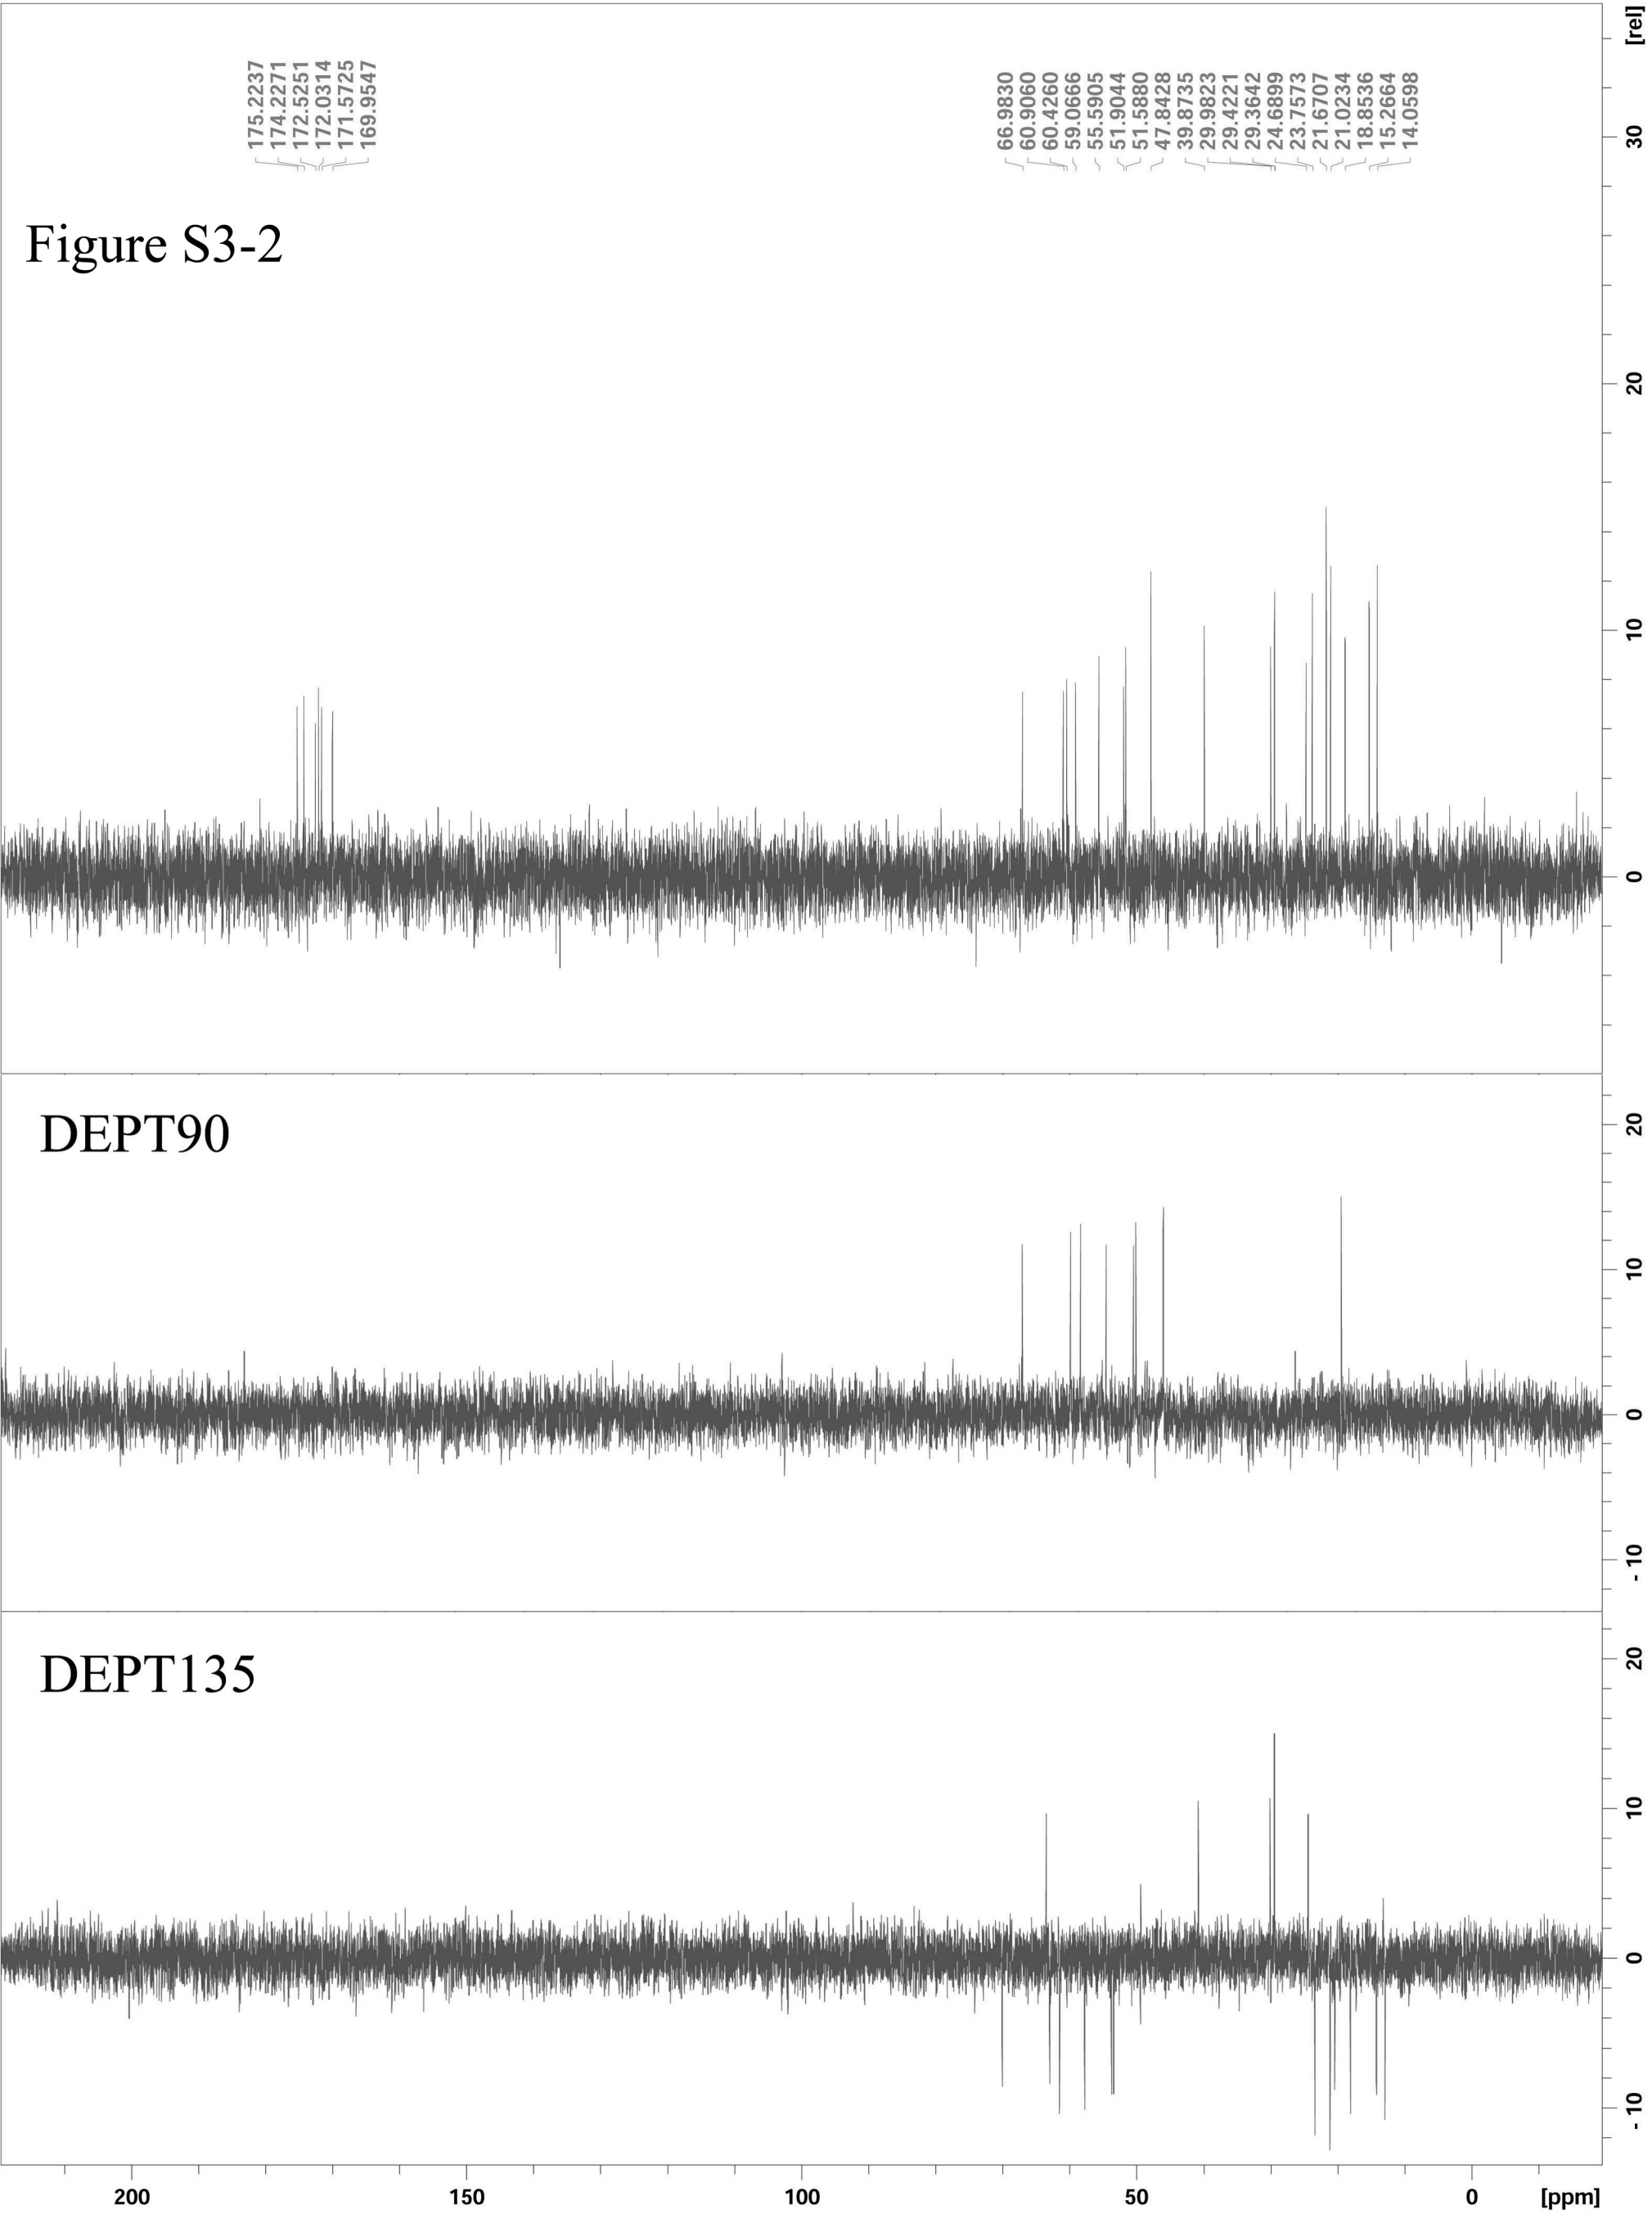

Figure S3-3

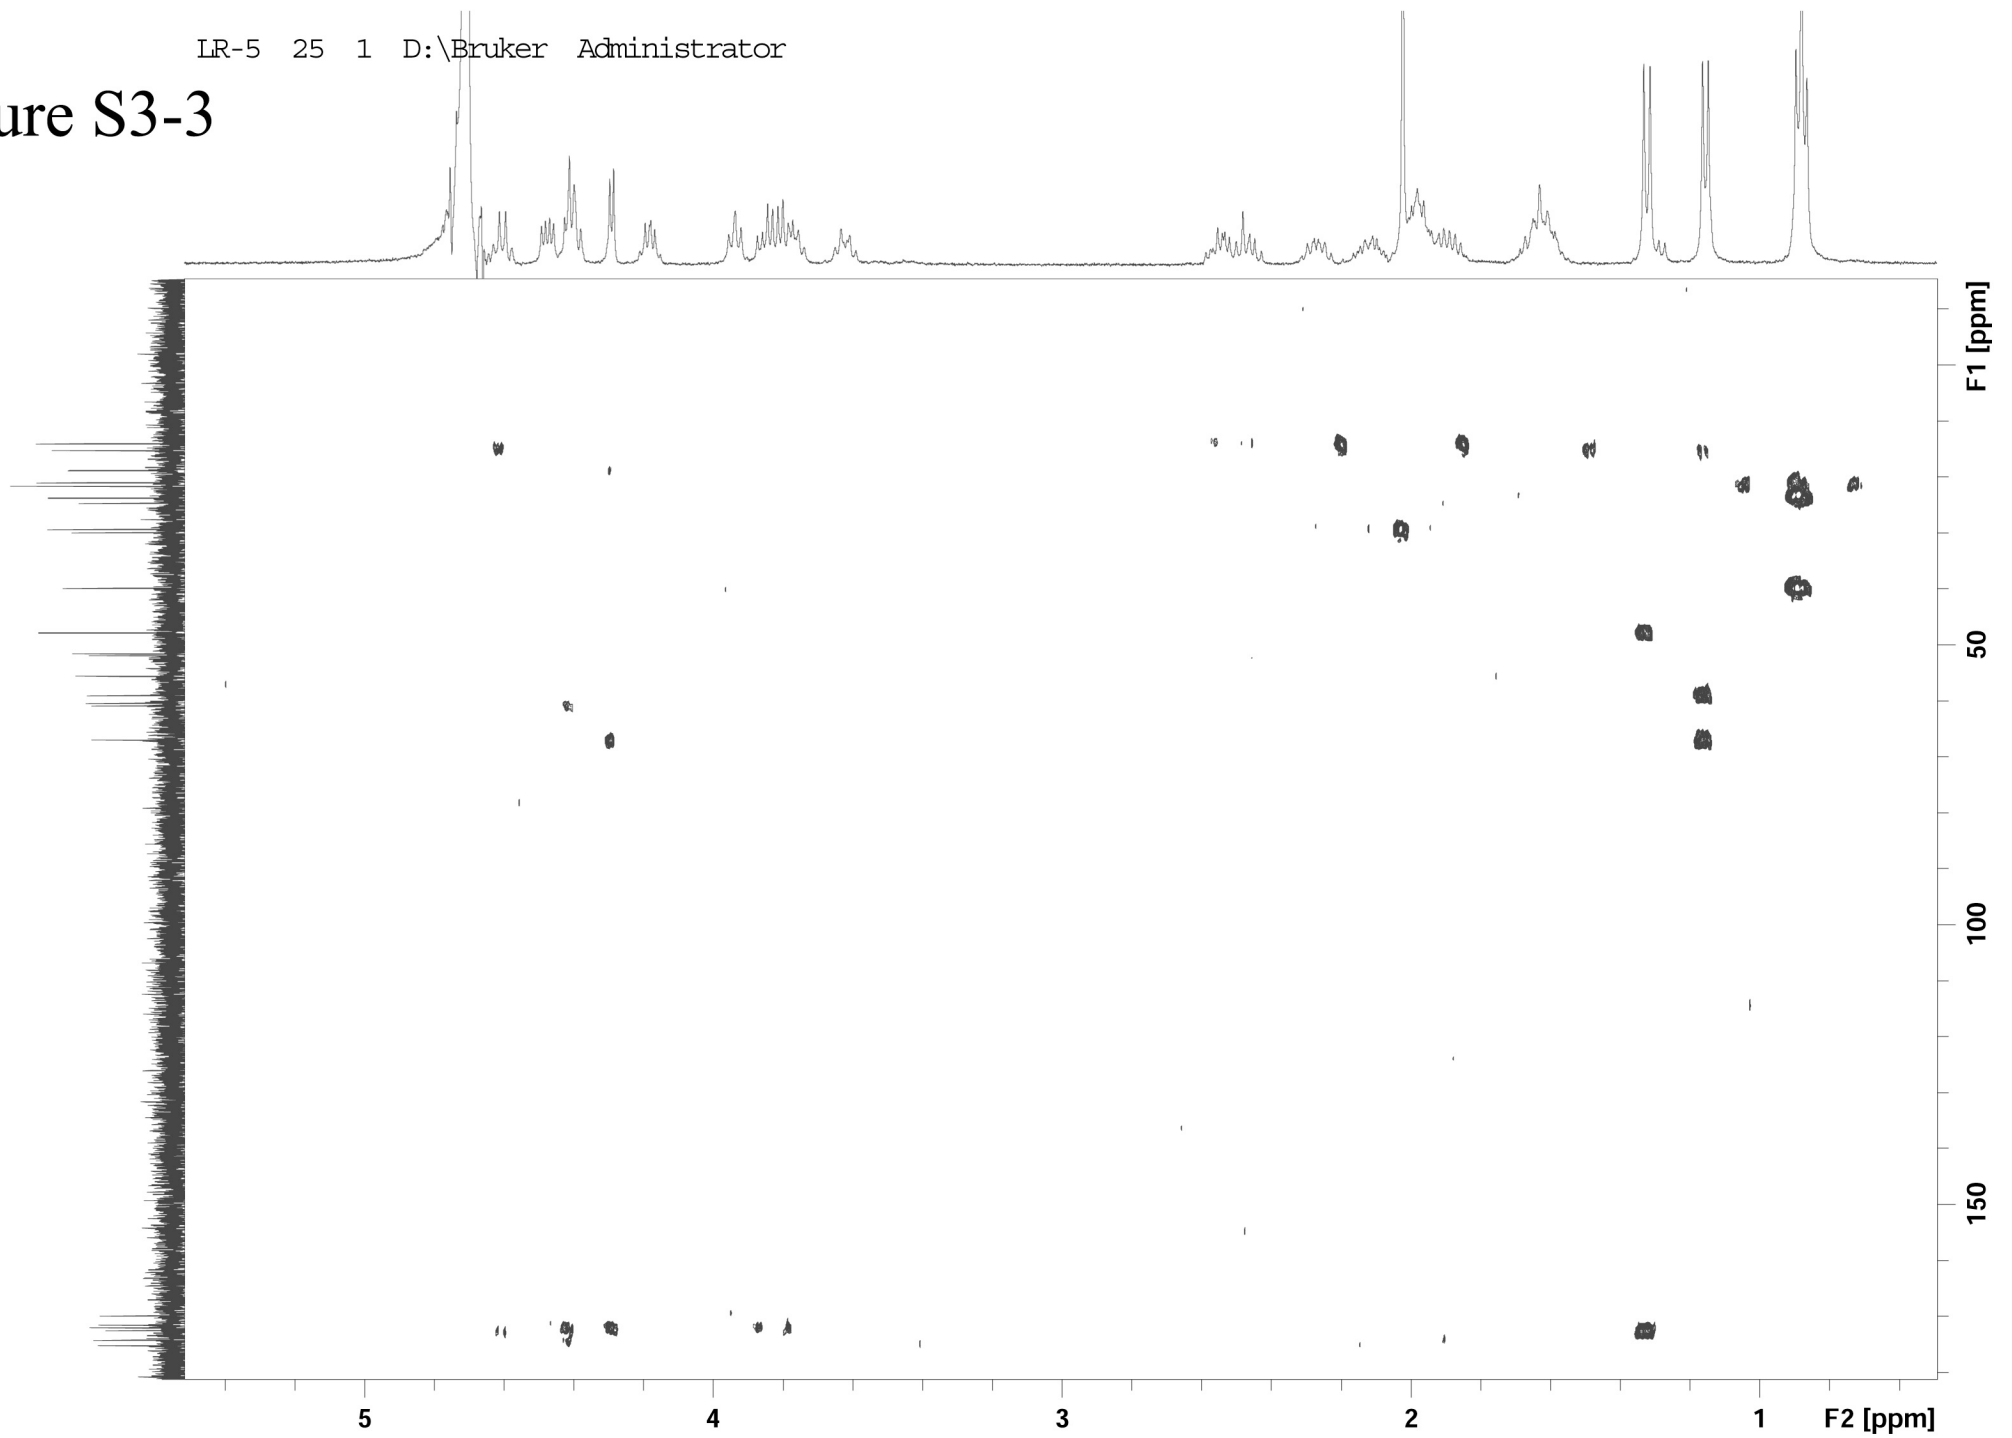

Figure S3-4

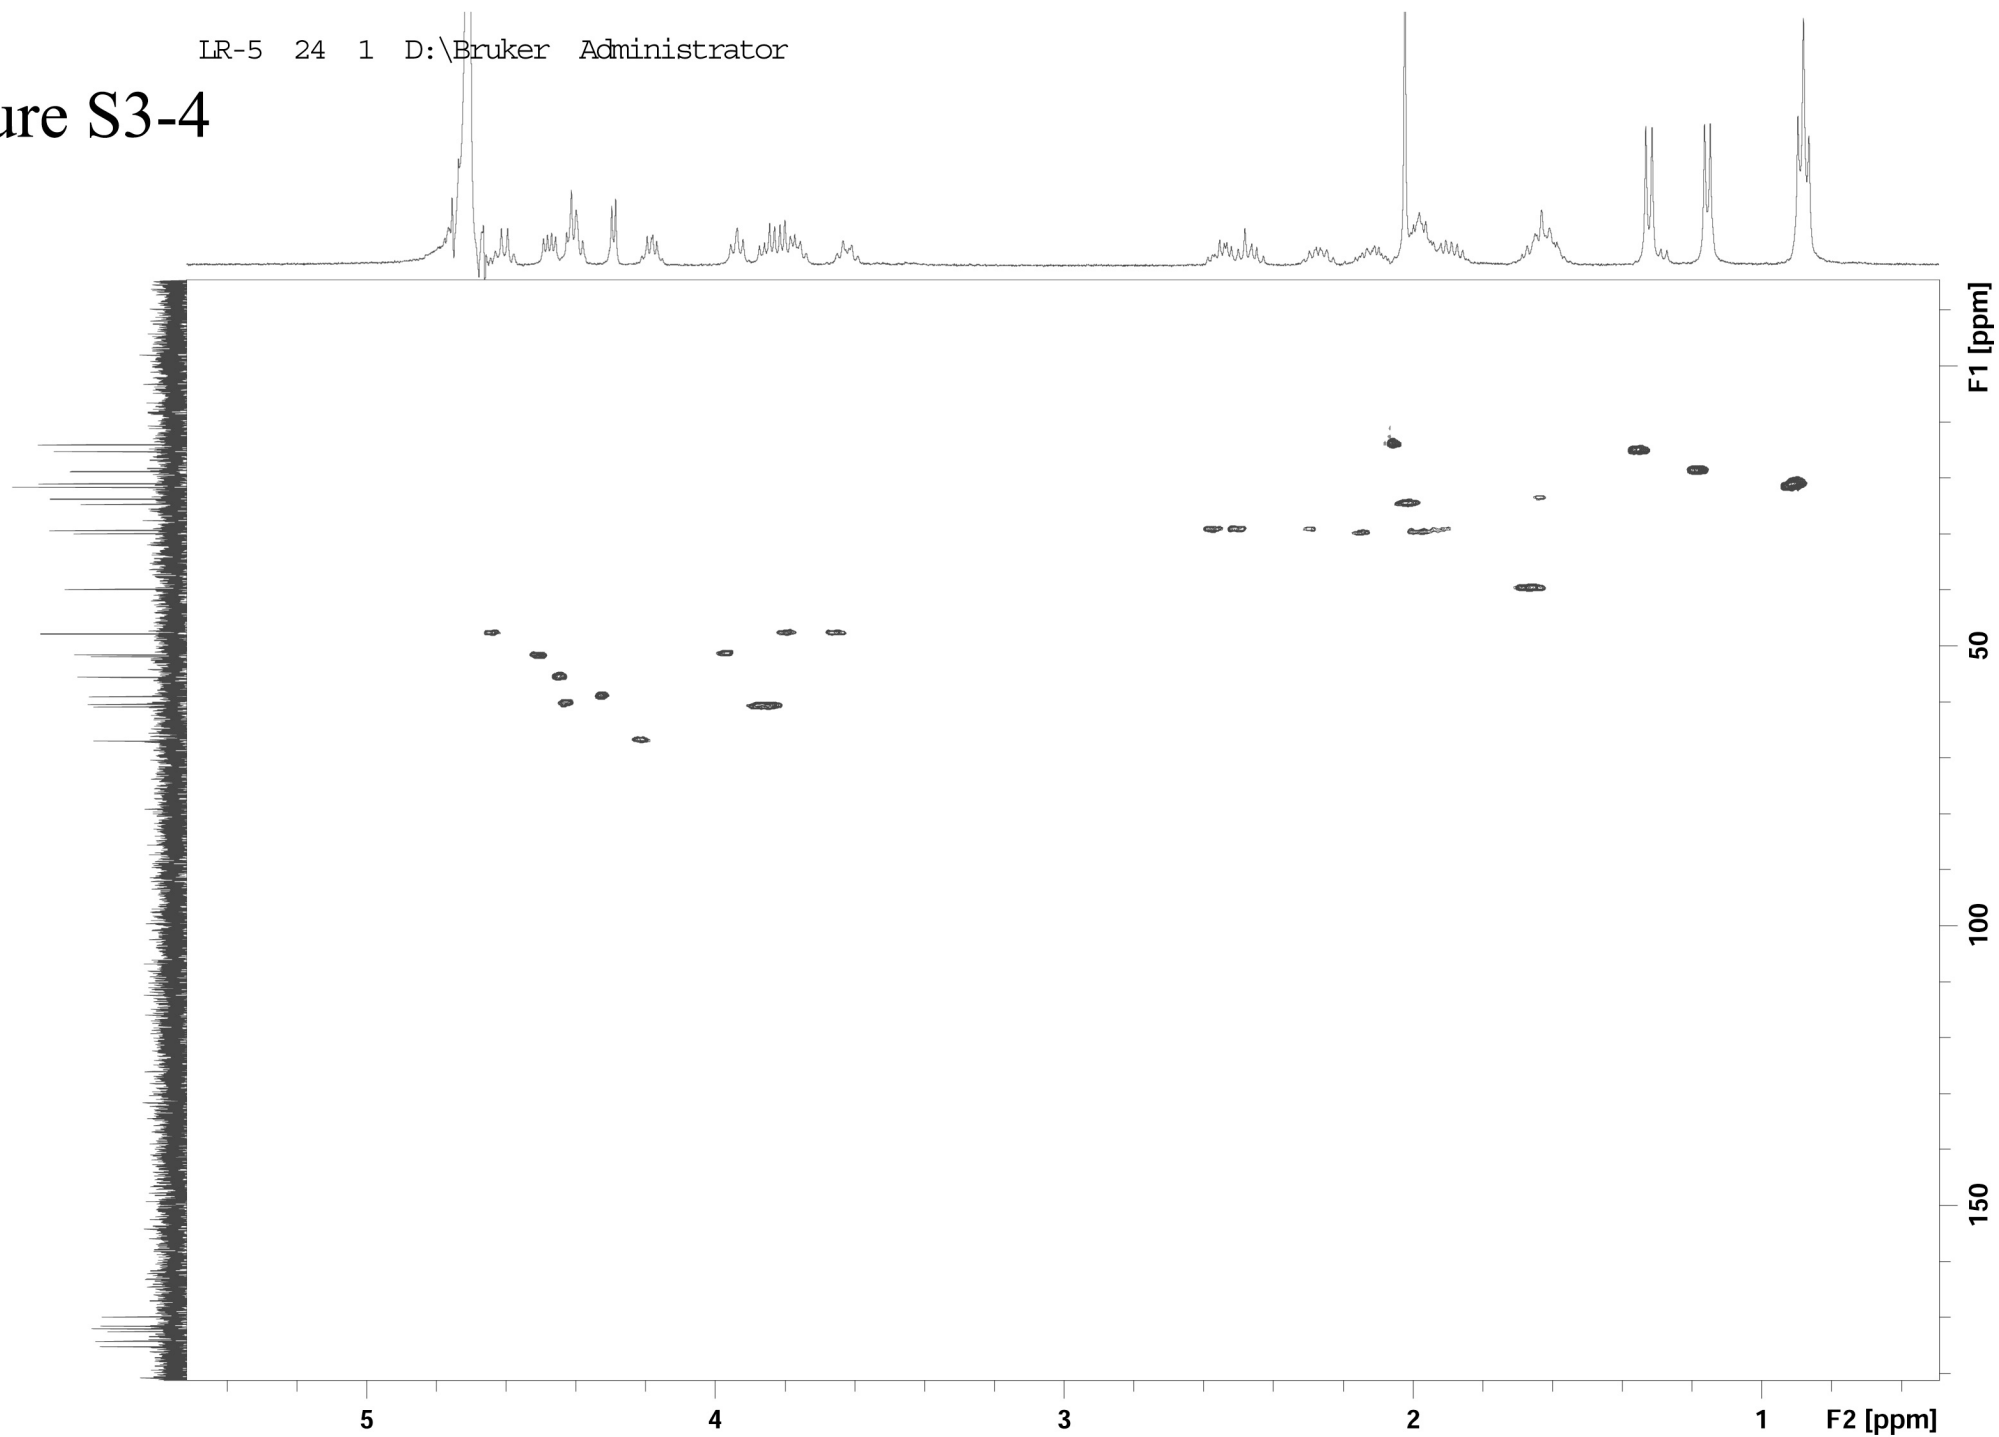

Figure S3-5

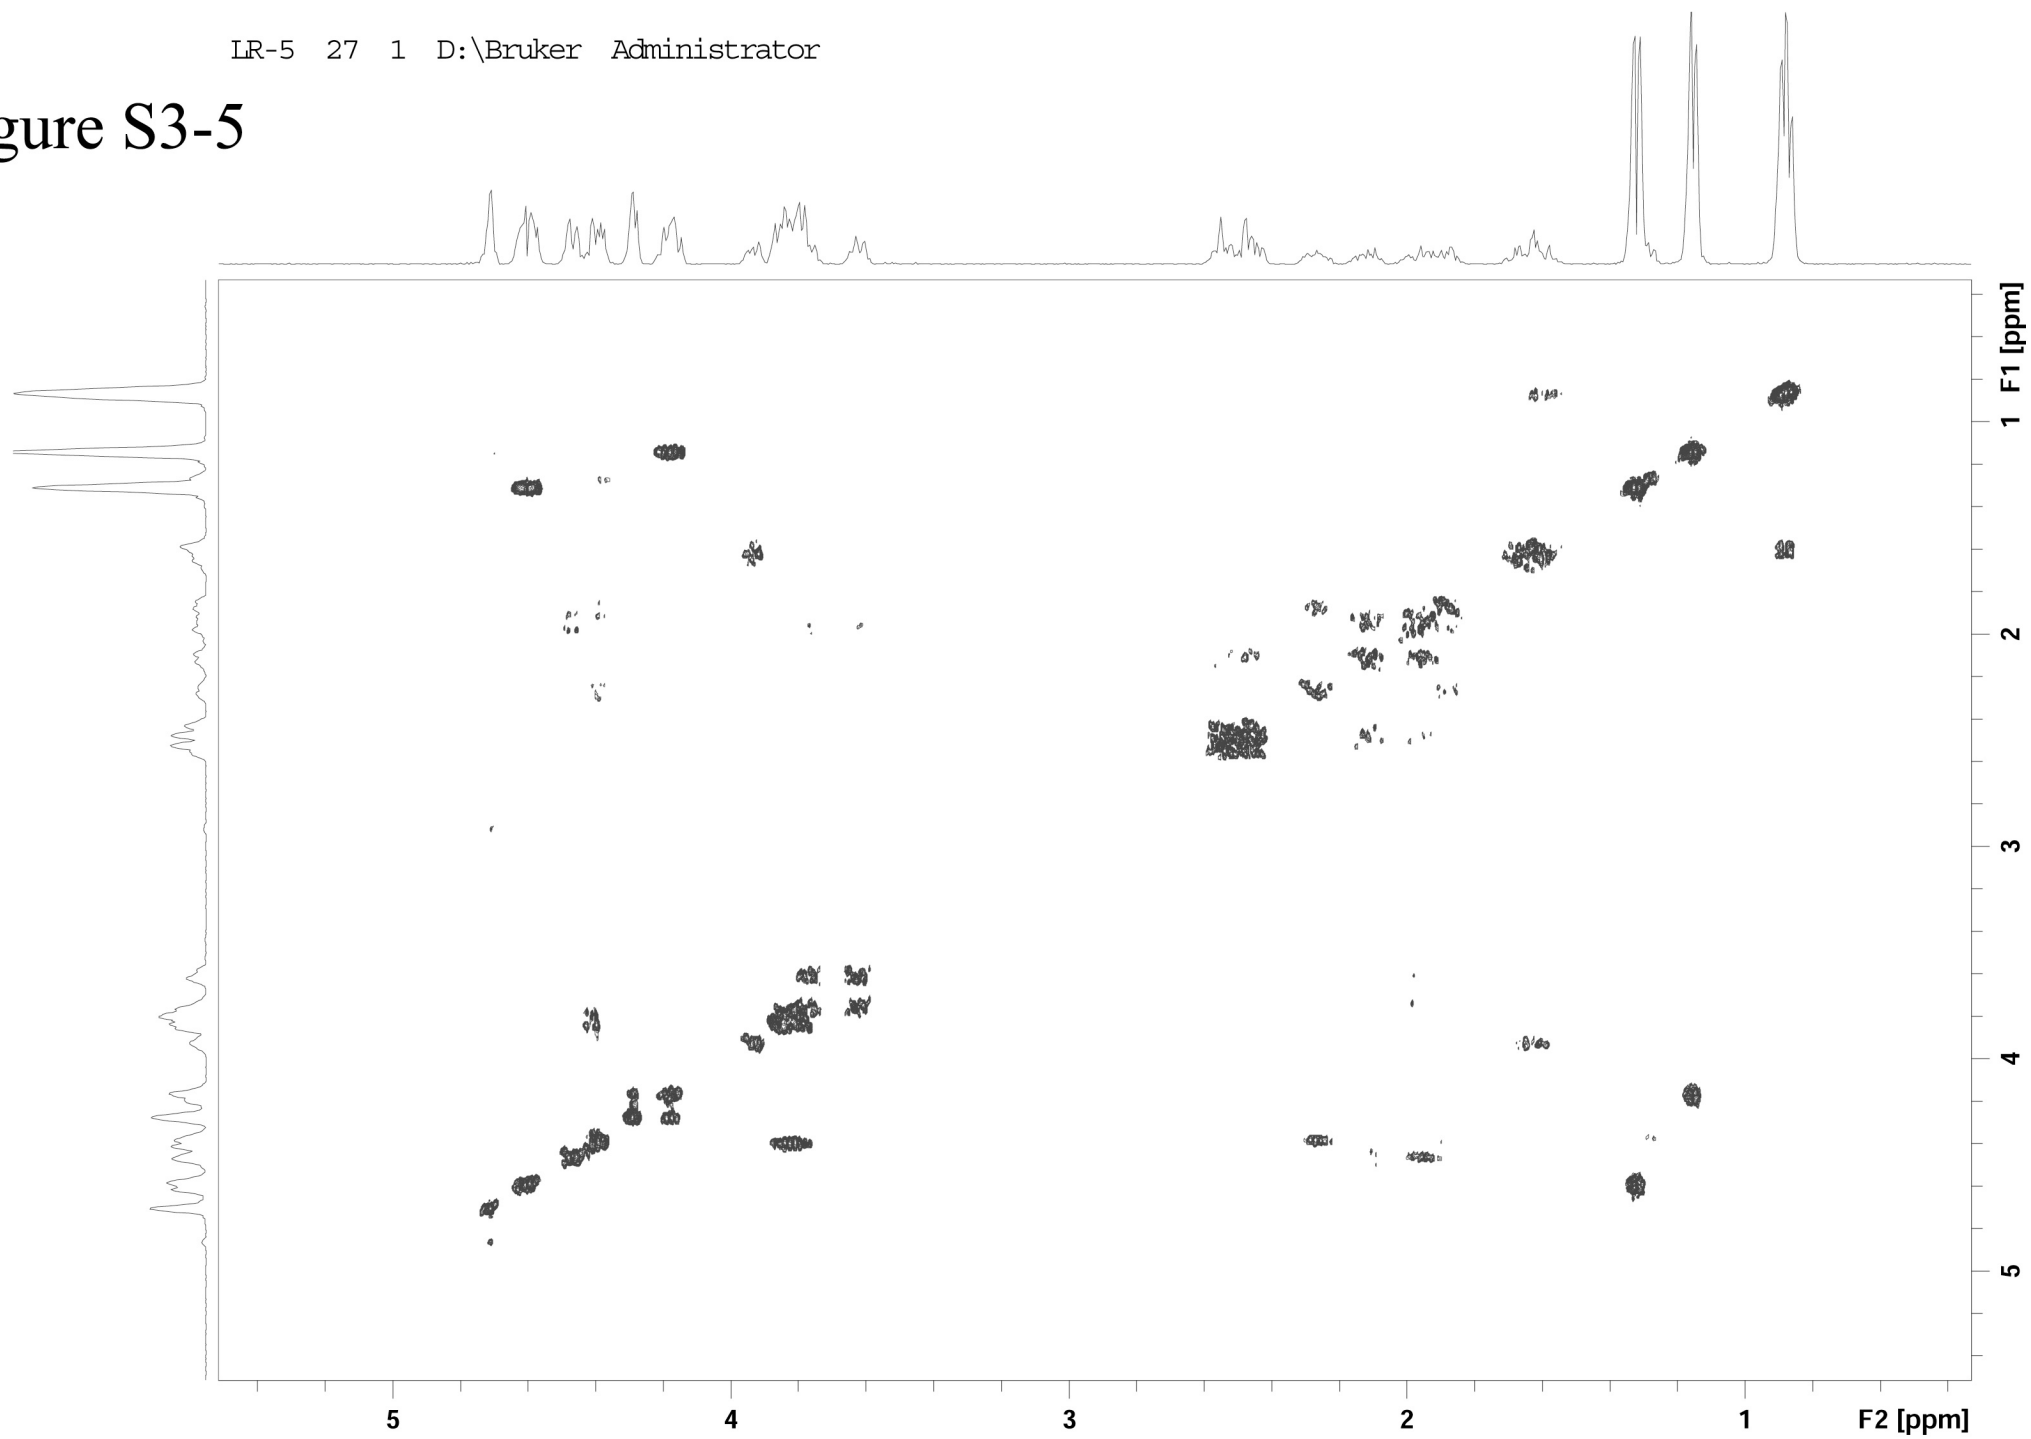

Figure S3-6

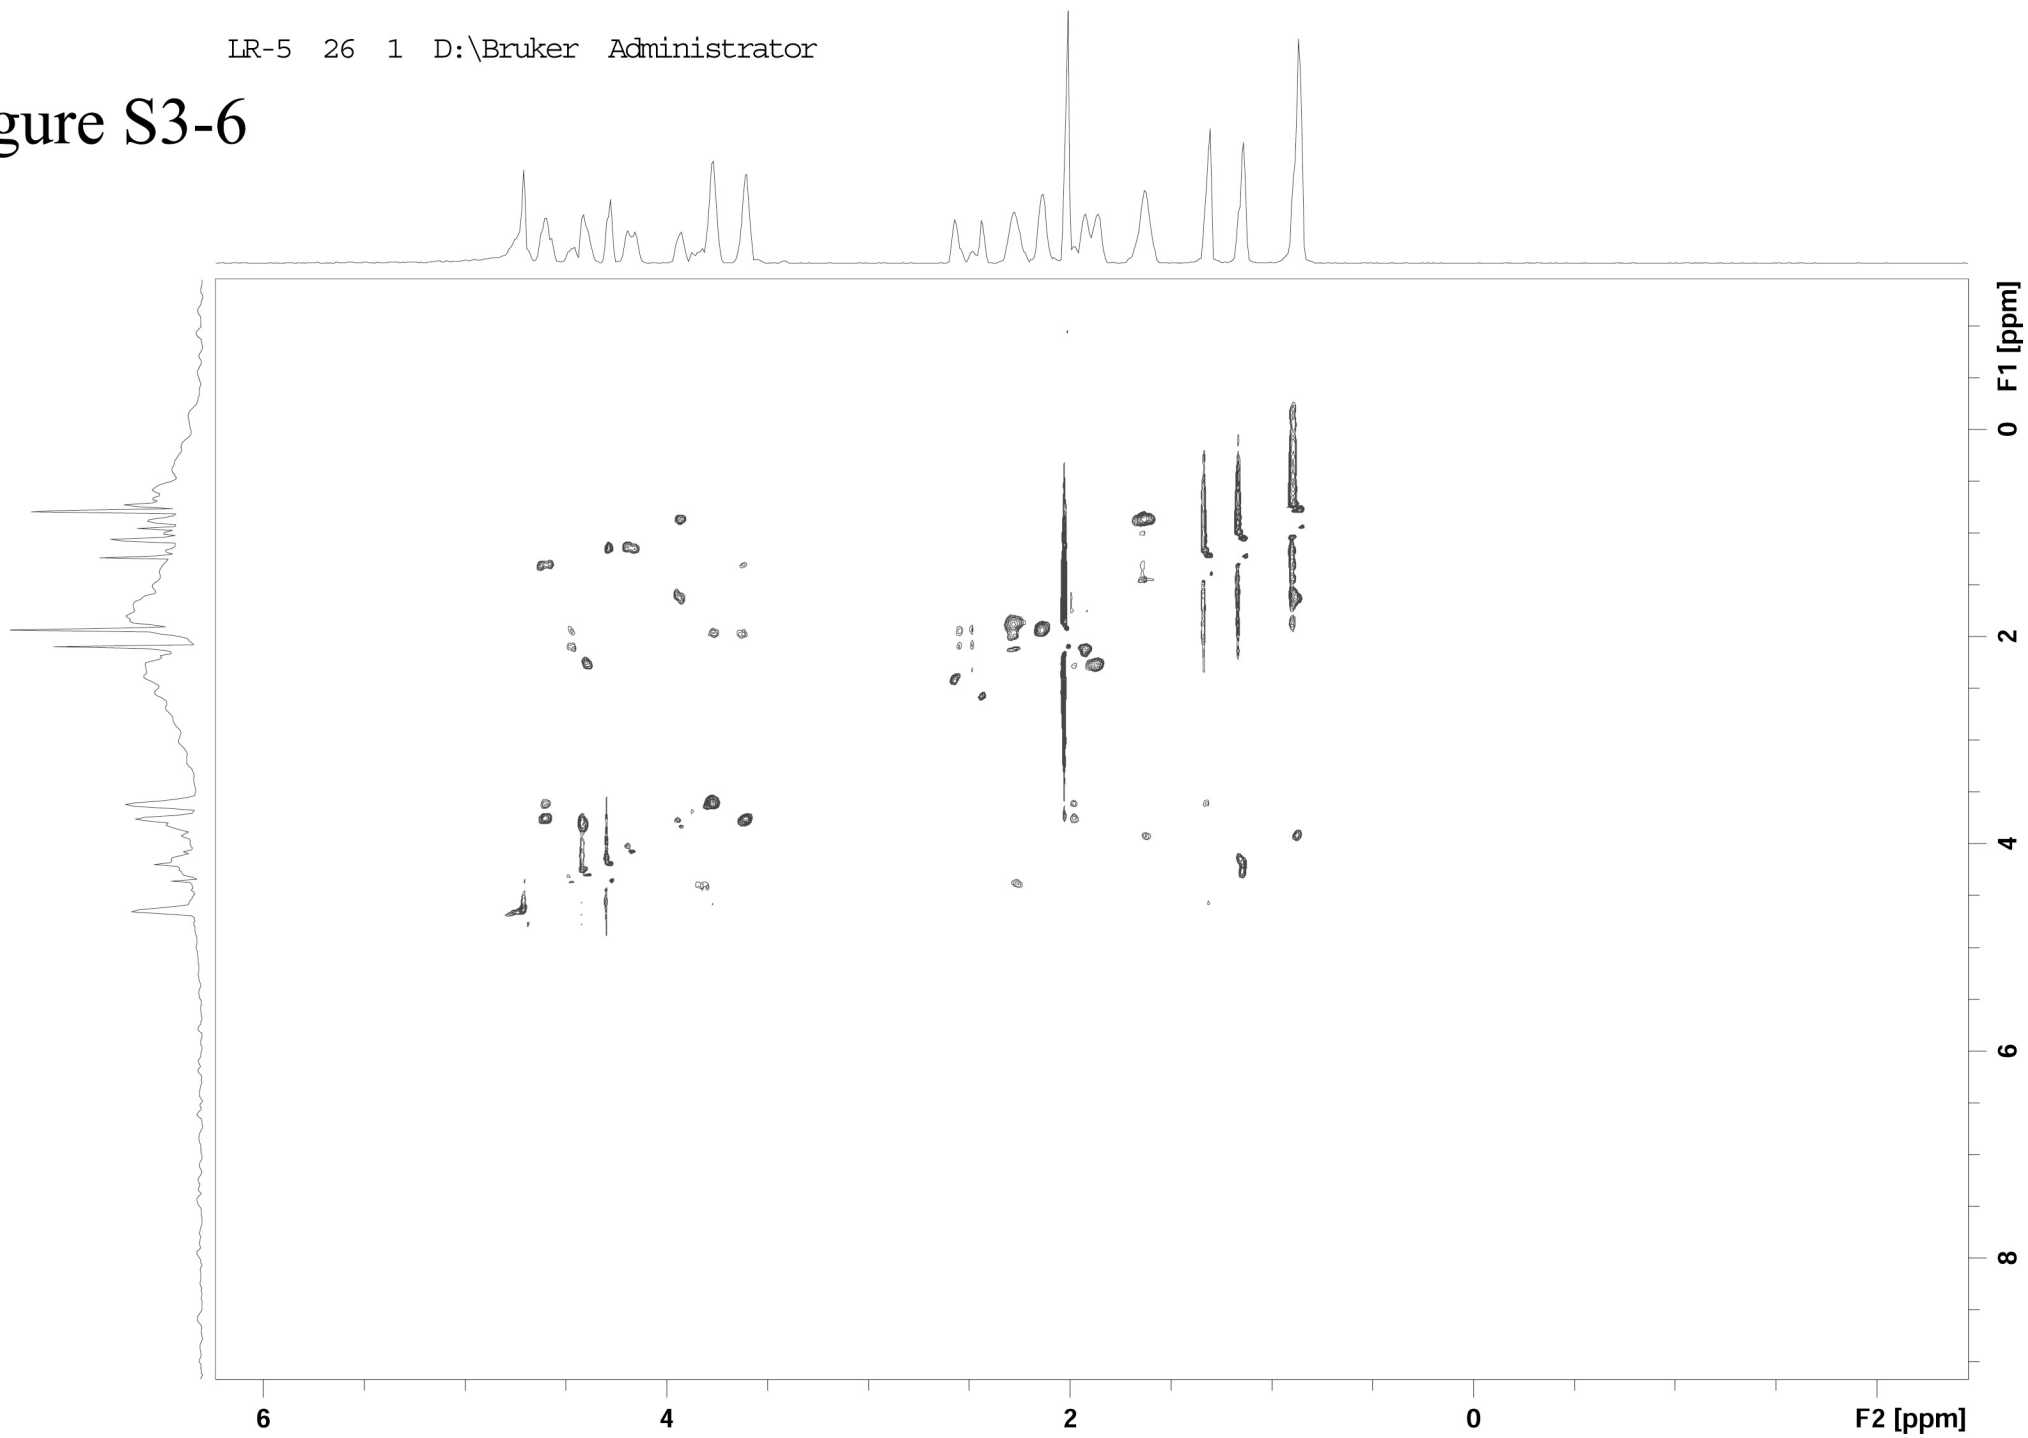

Supplement: s1 [file s1]
