# Supplementary material for: Rapid Identification of Dipeptidyl Peptidase-IV (DPP-IV) Inhibitory Peptides from Ruditapes philippinarum Hydrolysate
Source: MDPI journal article supplement (doi:10.3390/molecules22101714), 2017-10-13

**Figure captions:**

**Figure S2-1:**  $^1\text{H}$  NMR spectrum of FAGDDAPR.

**Figure S2-2:**  $^{13}\text{C}$  NMR spectrum, DEPT90 and DEPT135 spectrum of FAGDDAPR.

**Figure S2-3:** HMBC spectrum of FAGDDAPR.

**Figure S2-4:** HMQC spectrum of FAGDDAPR.

**Figure S2-5:** COSY spectrum of FAGDDAPR.

**Figure S2-6:** ROESY spectrum of FAGDDAPR.

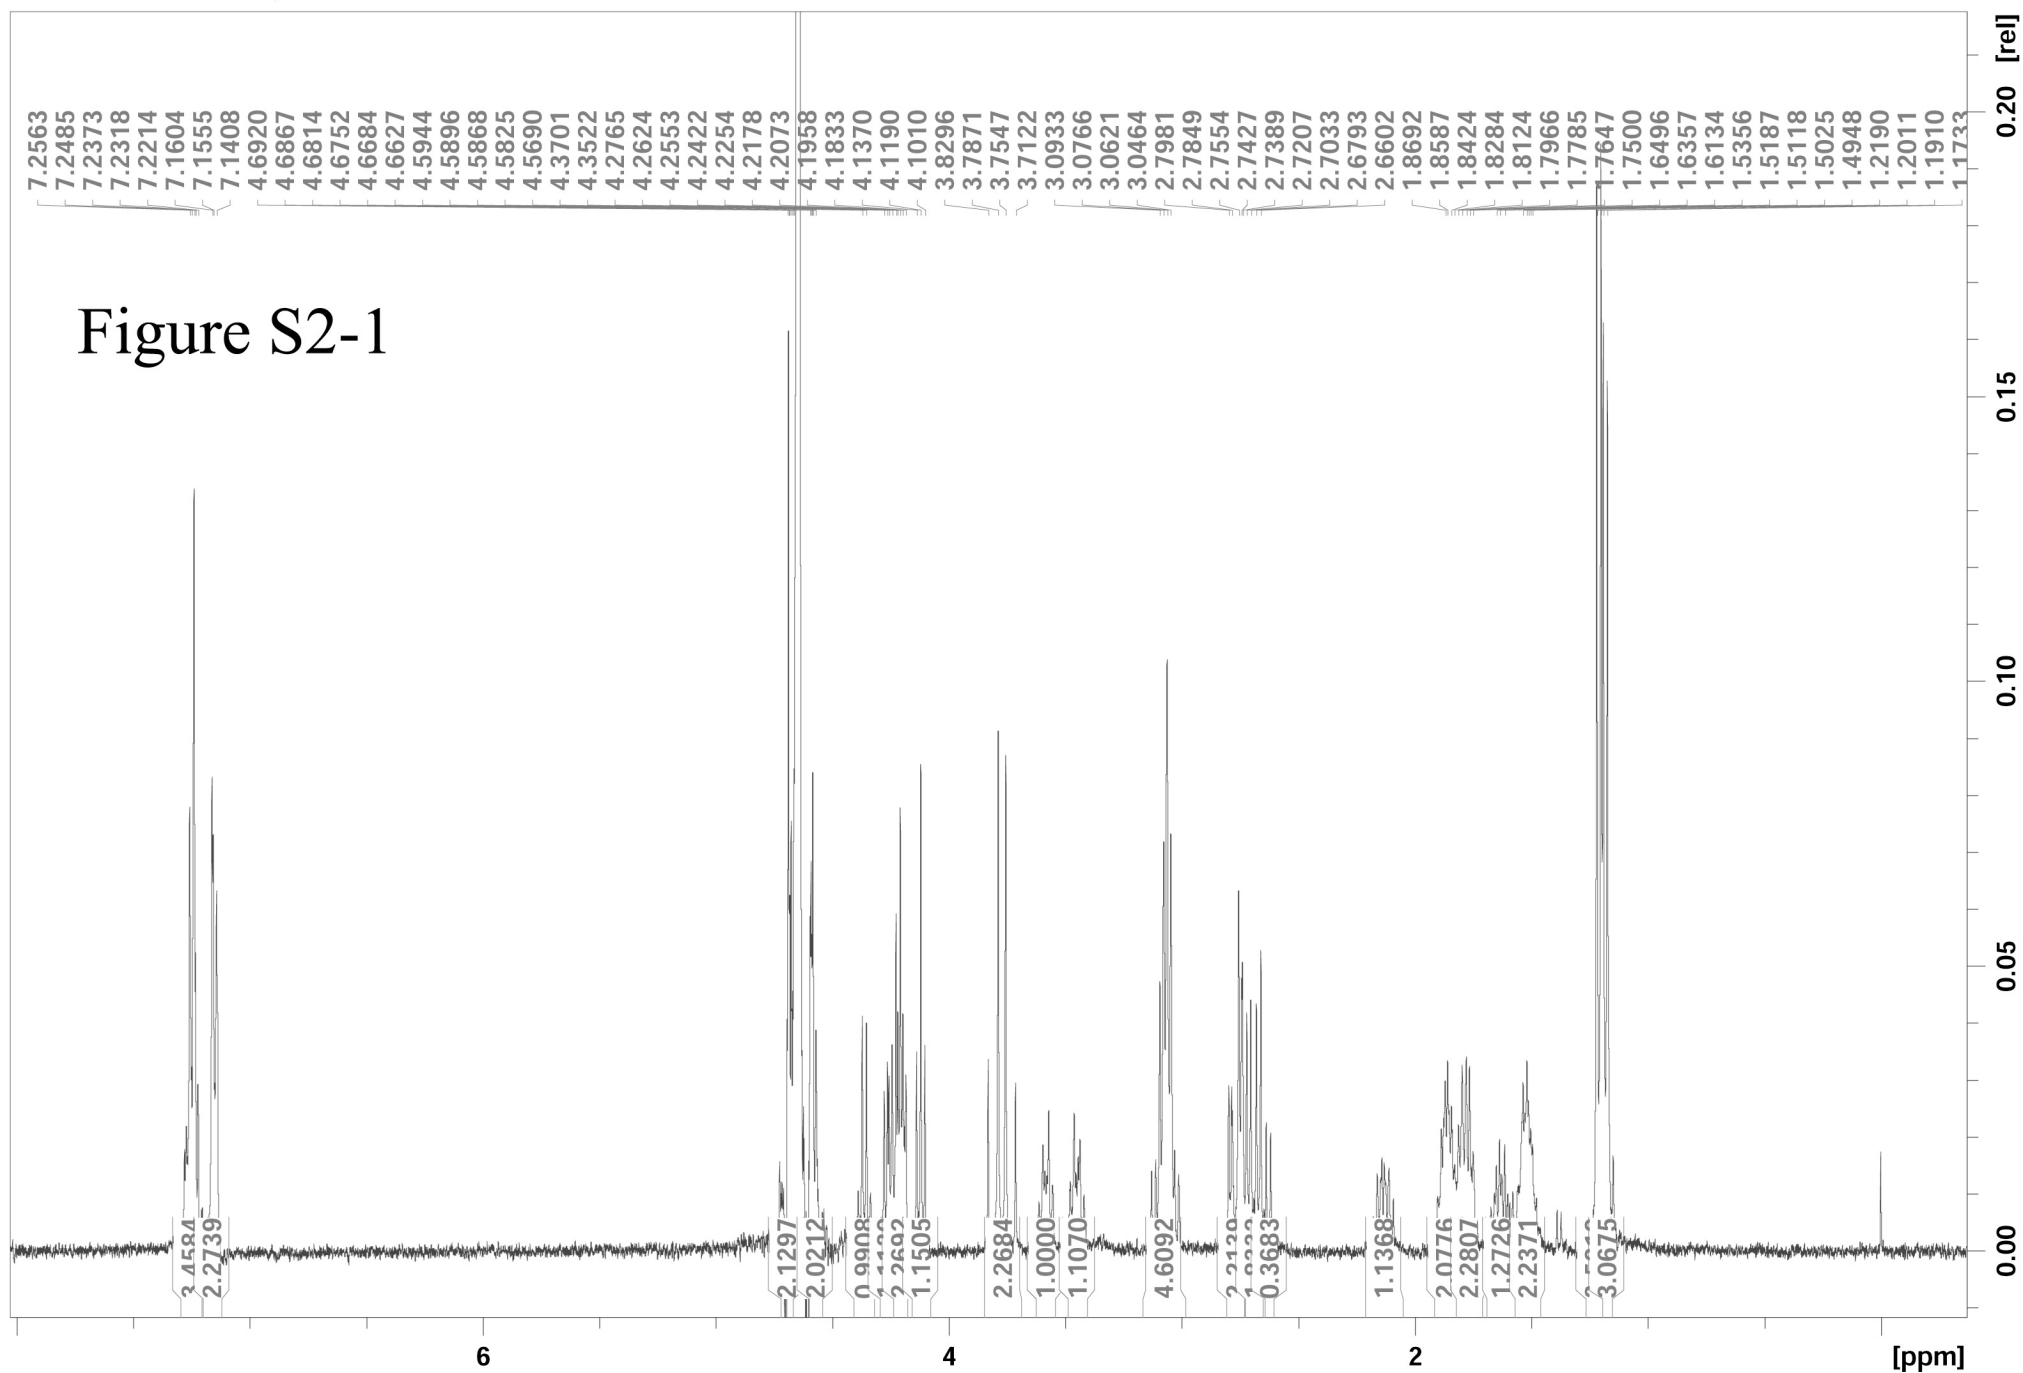

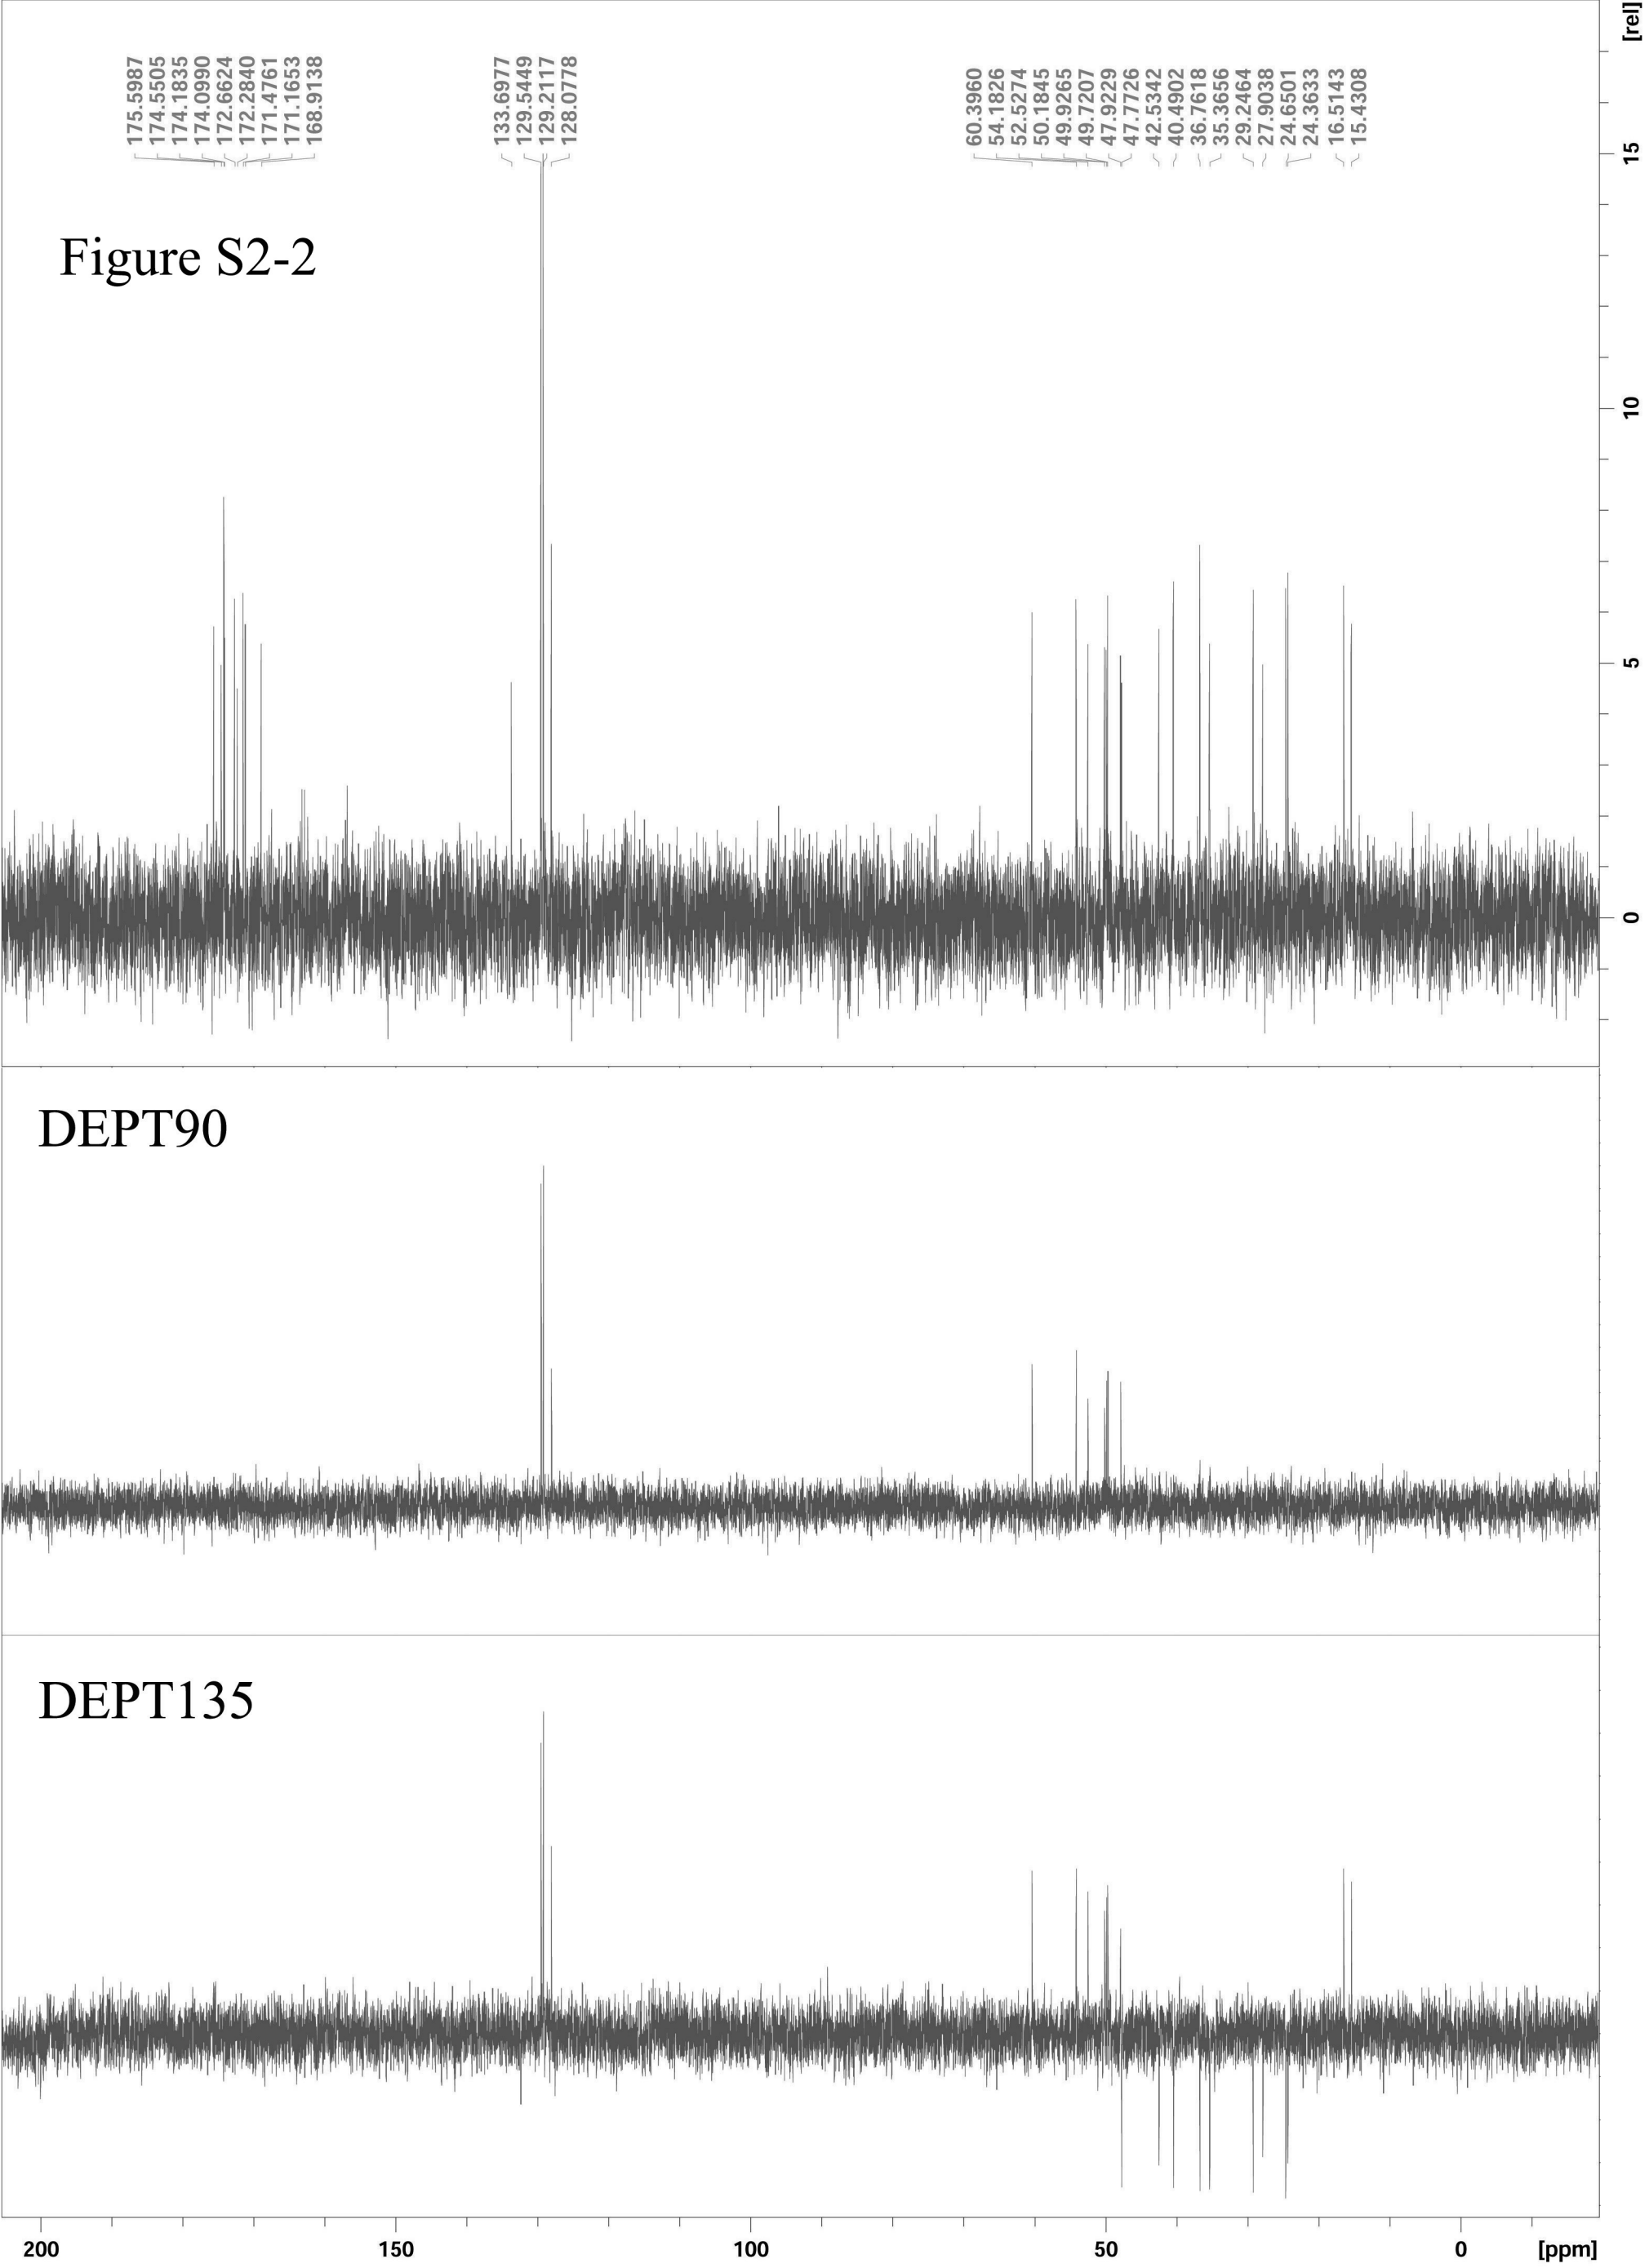

Figure S2-3

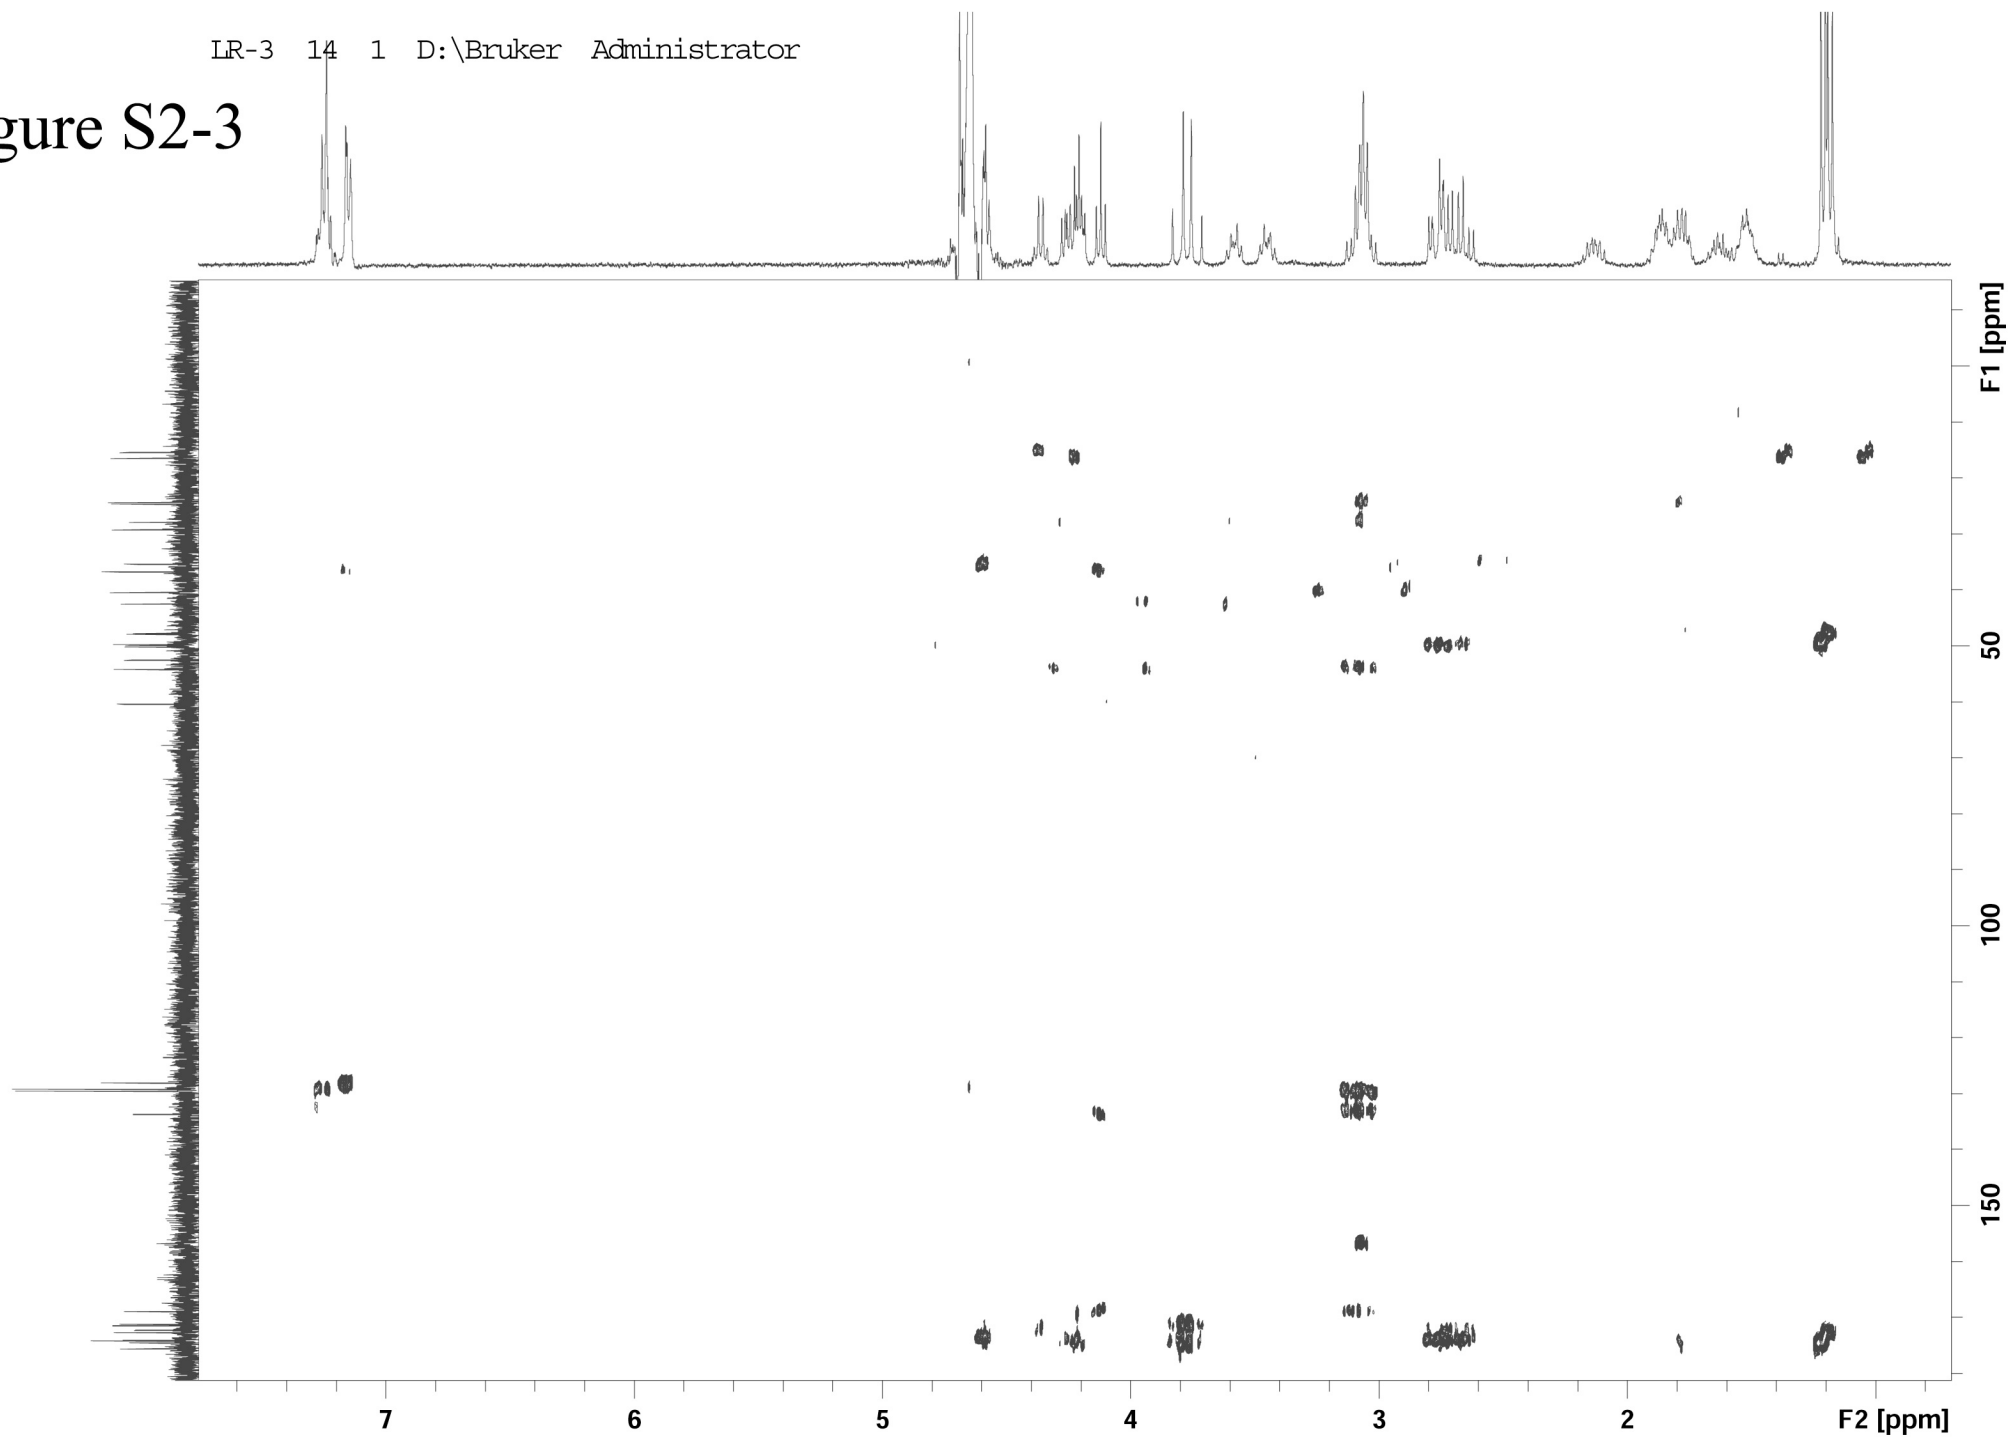

Figure S2-4

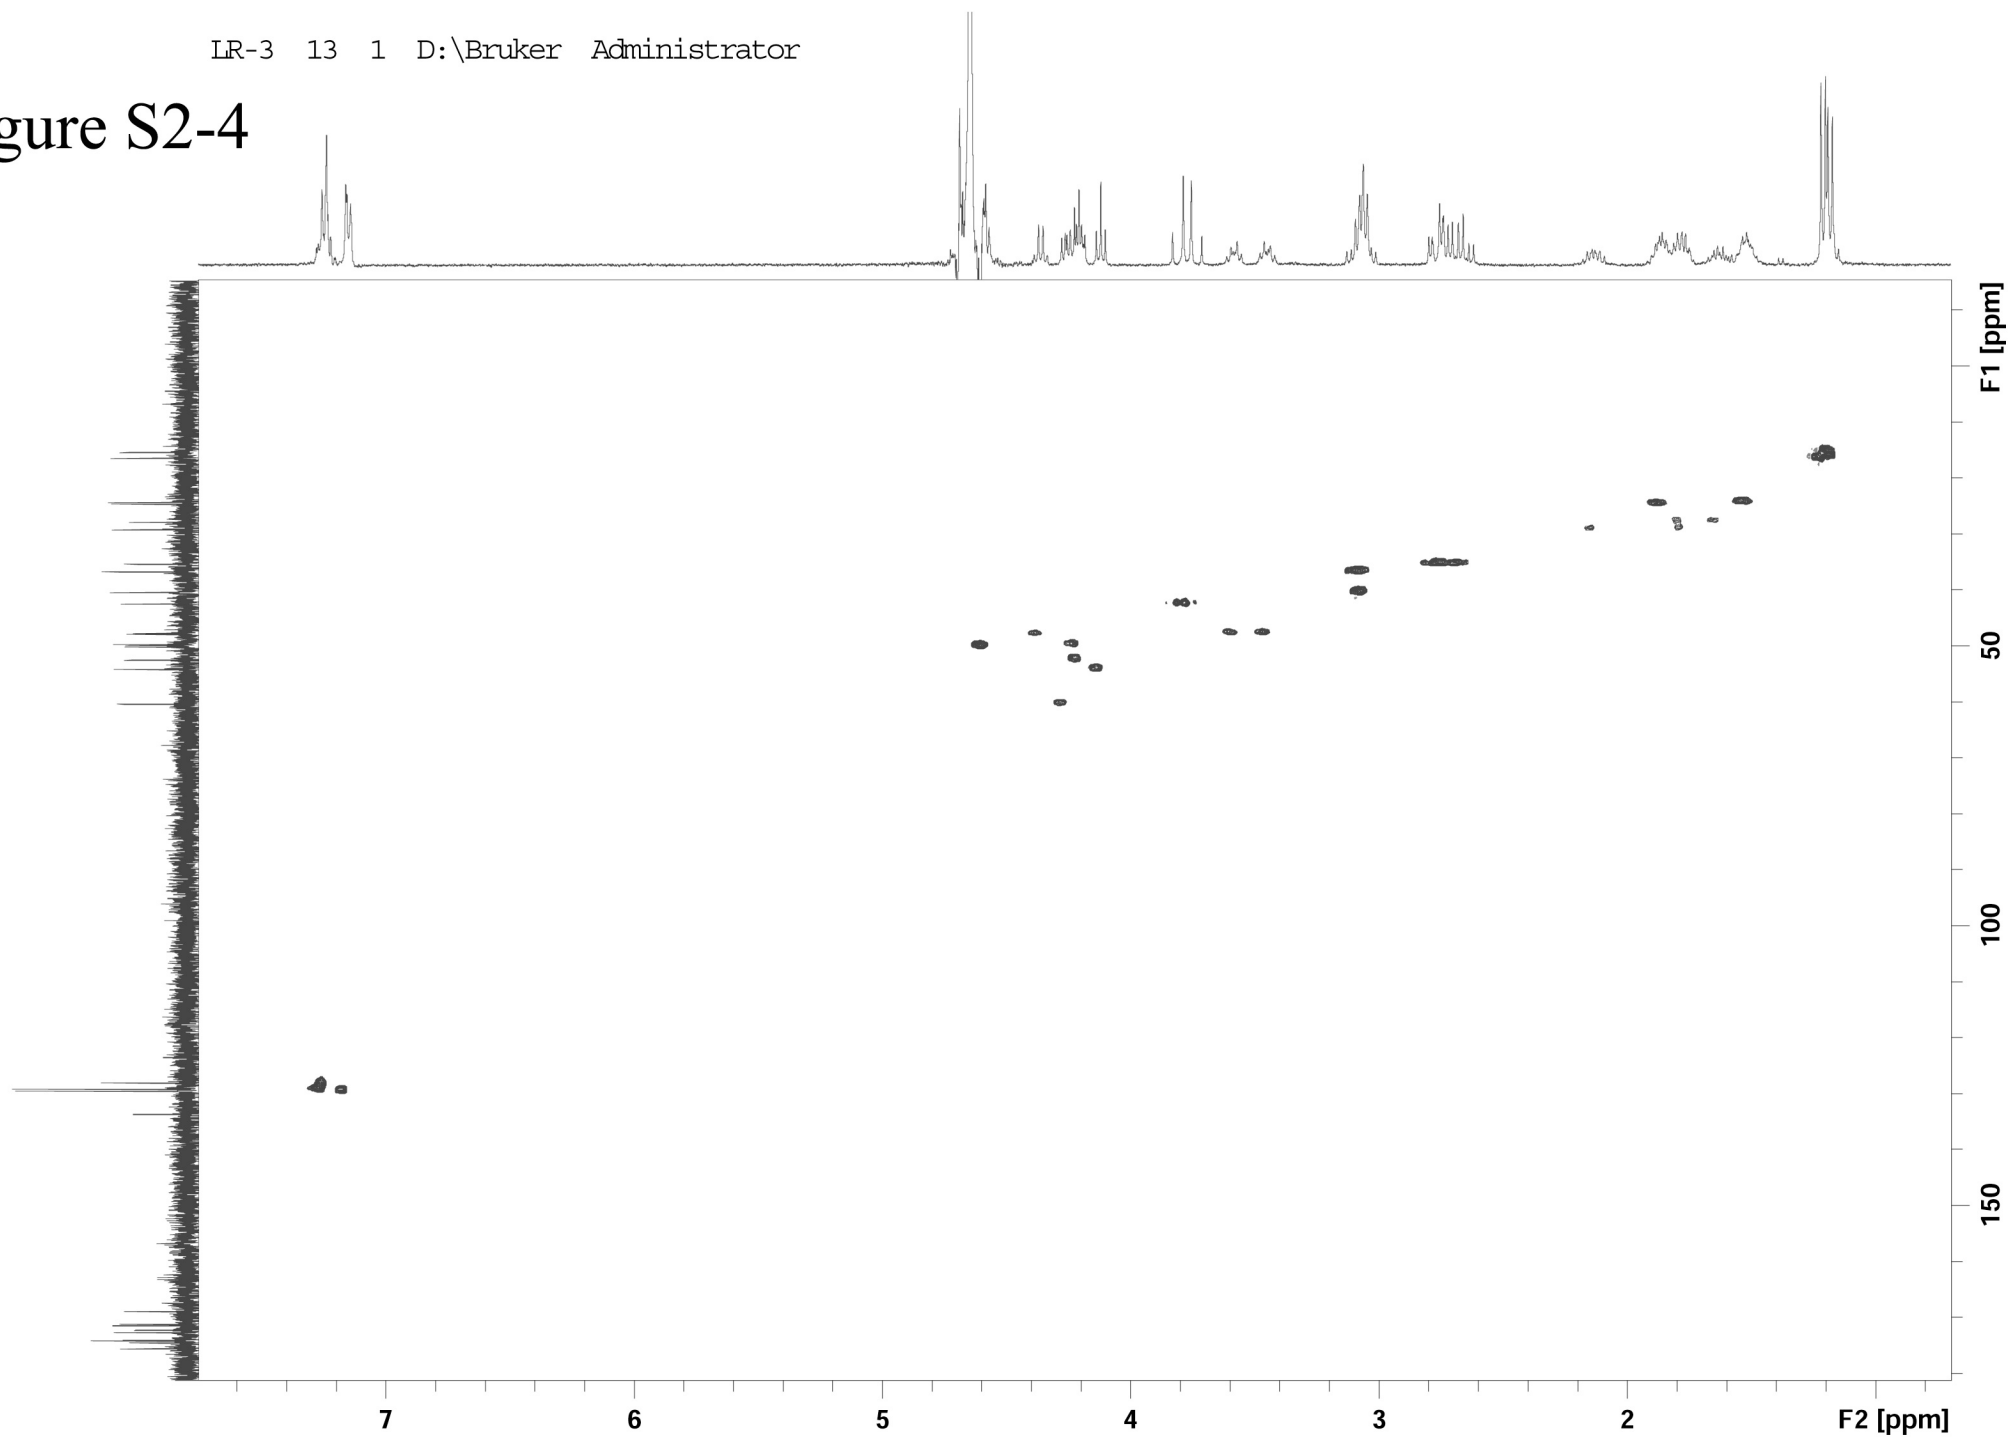

Figure S2-5

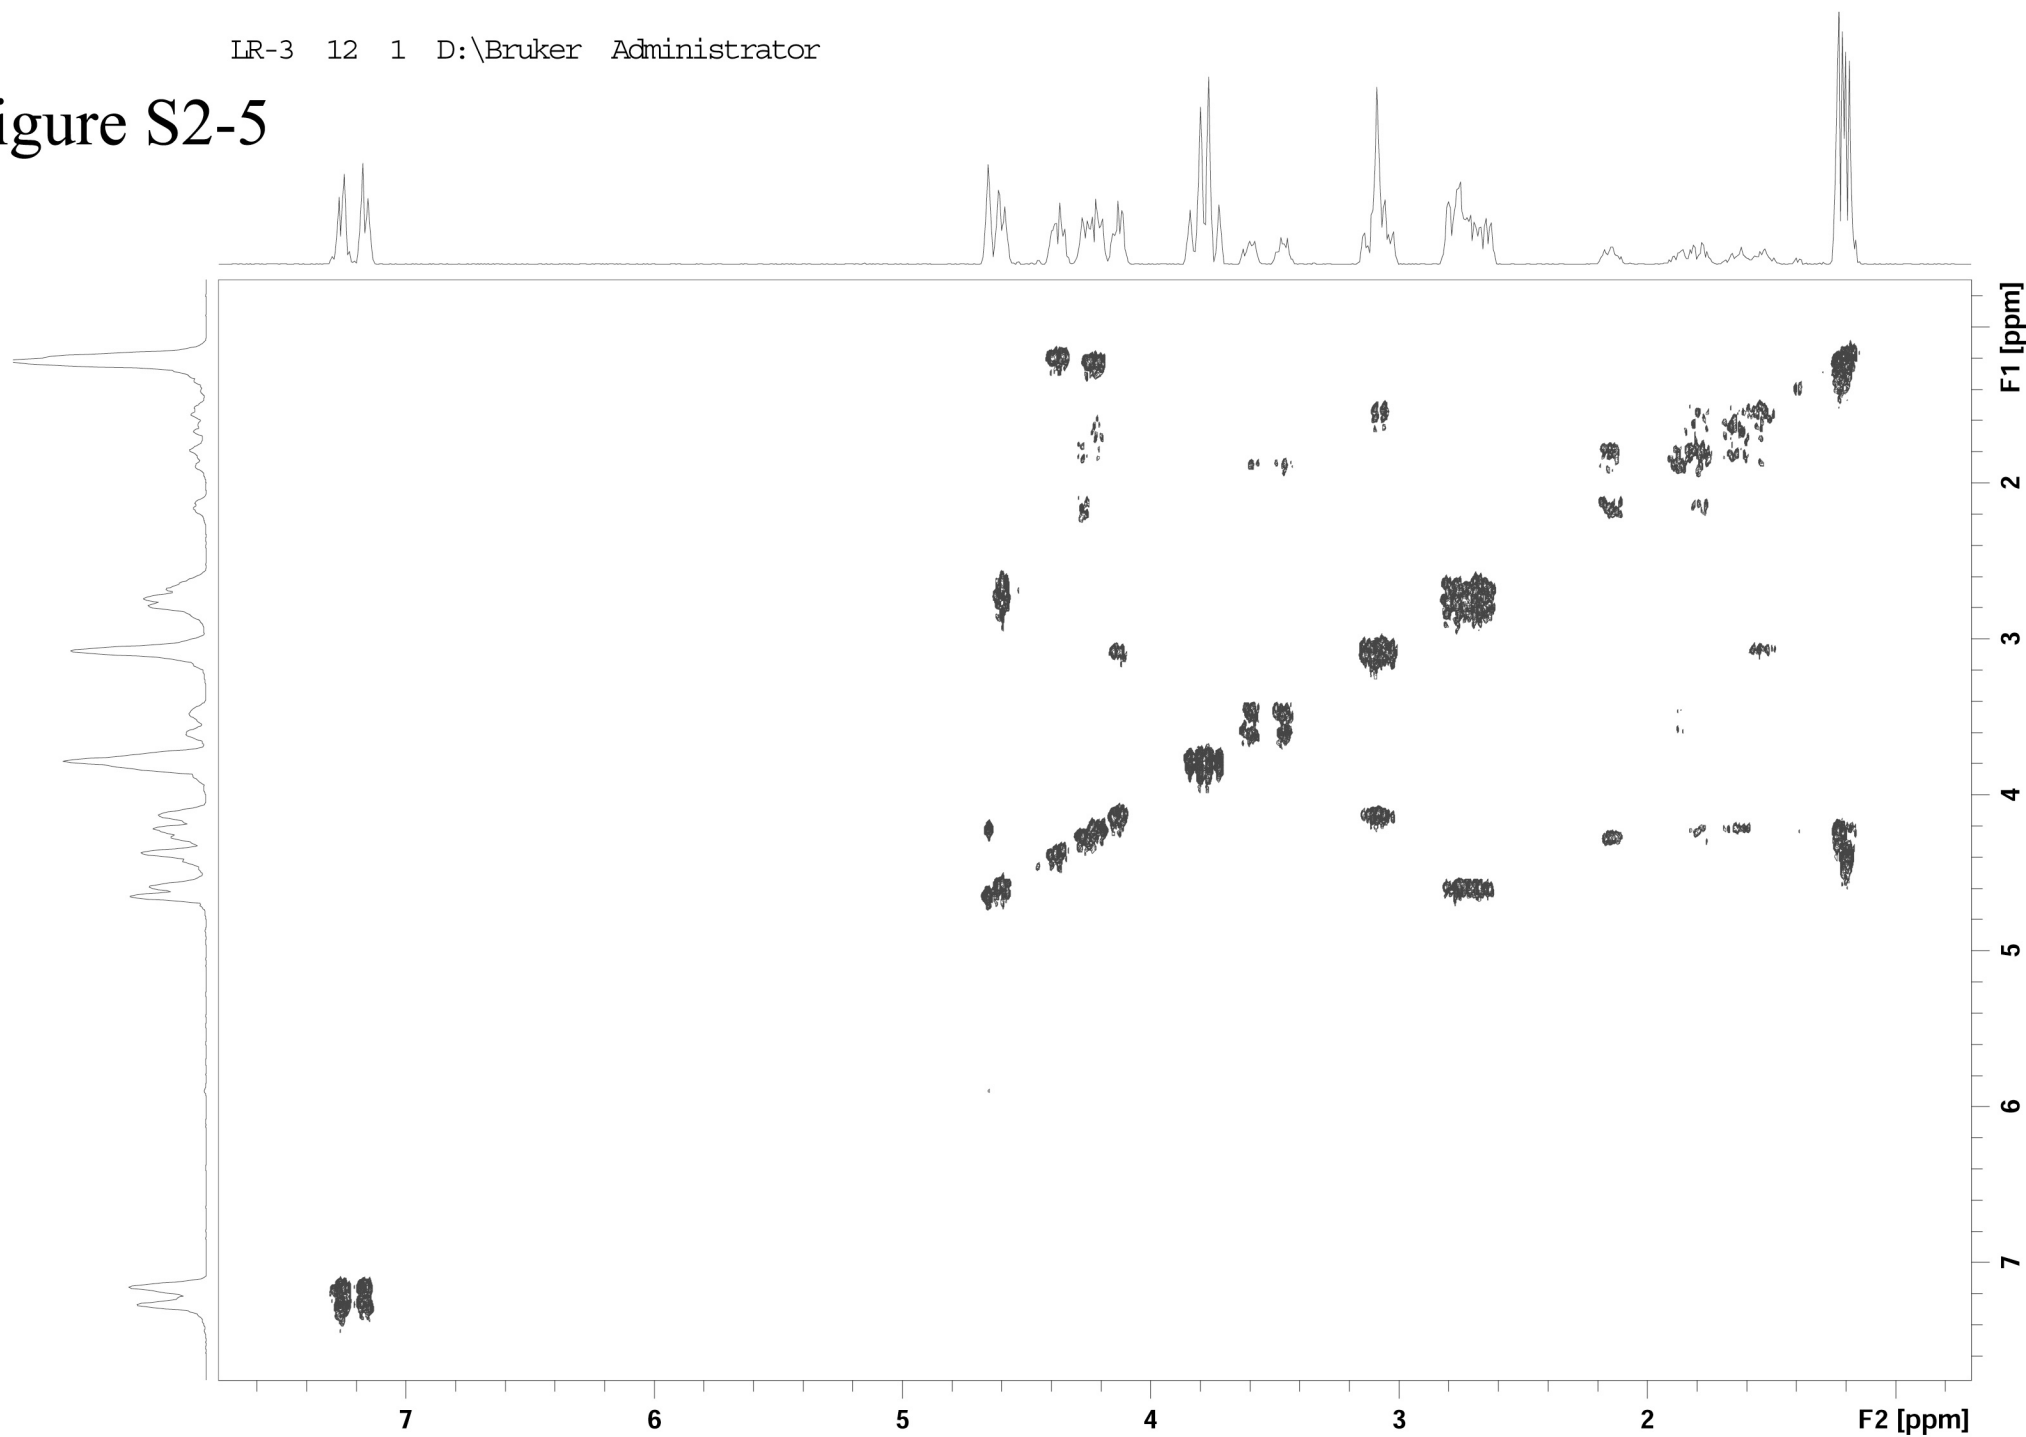

Figure S2-6

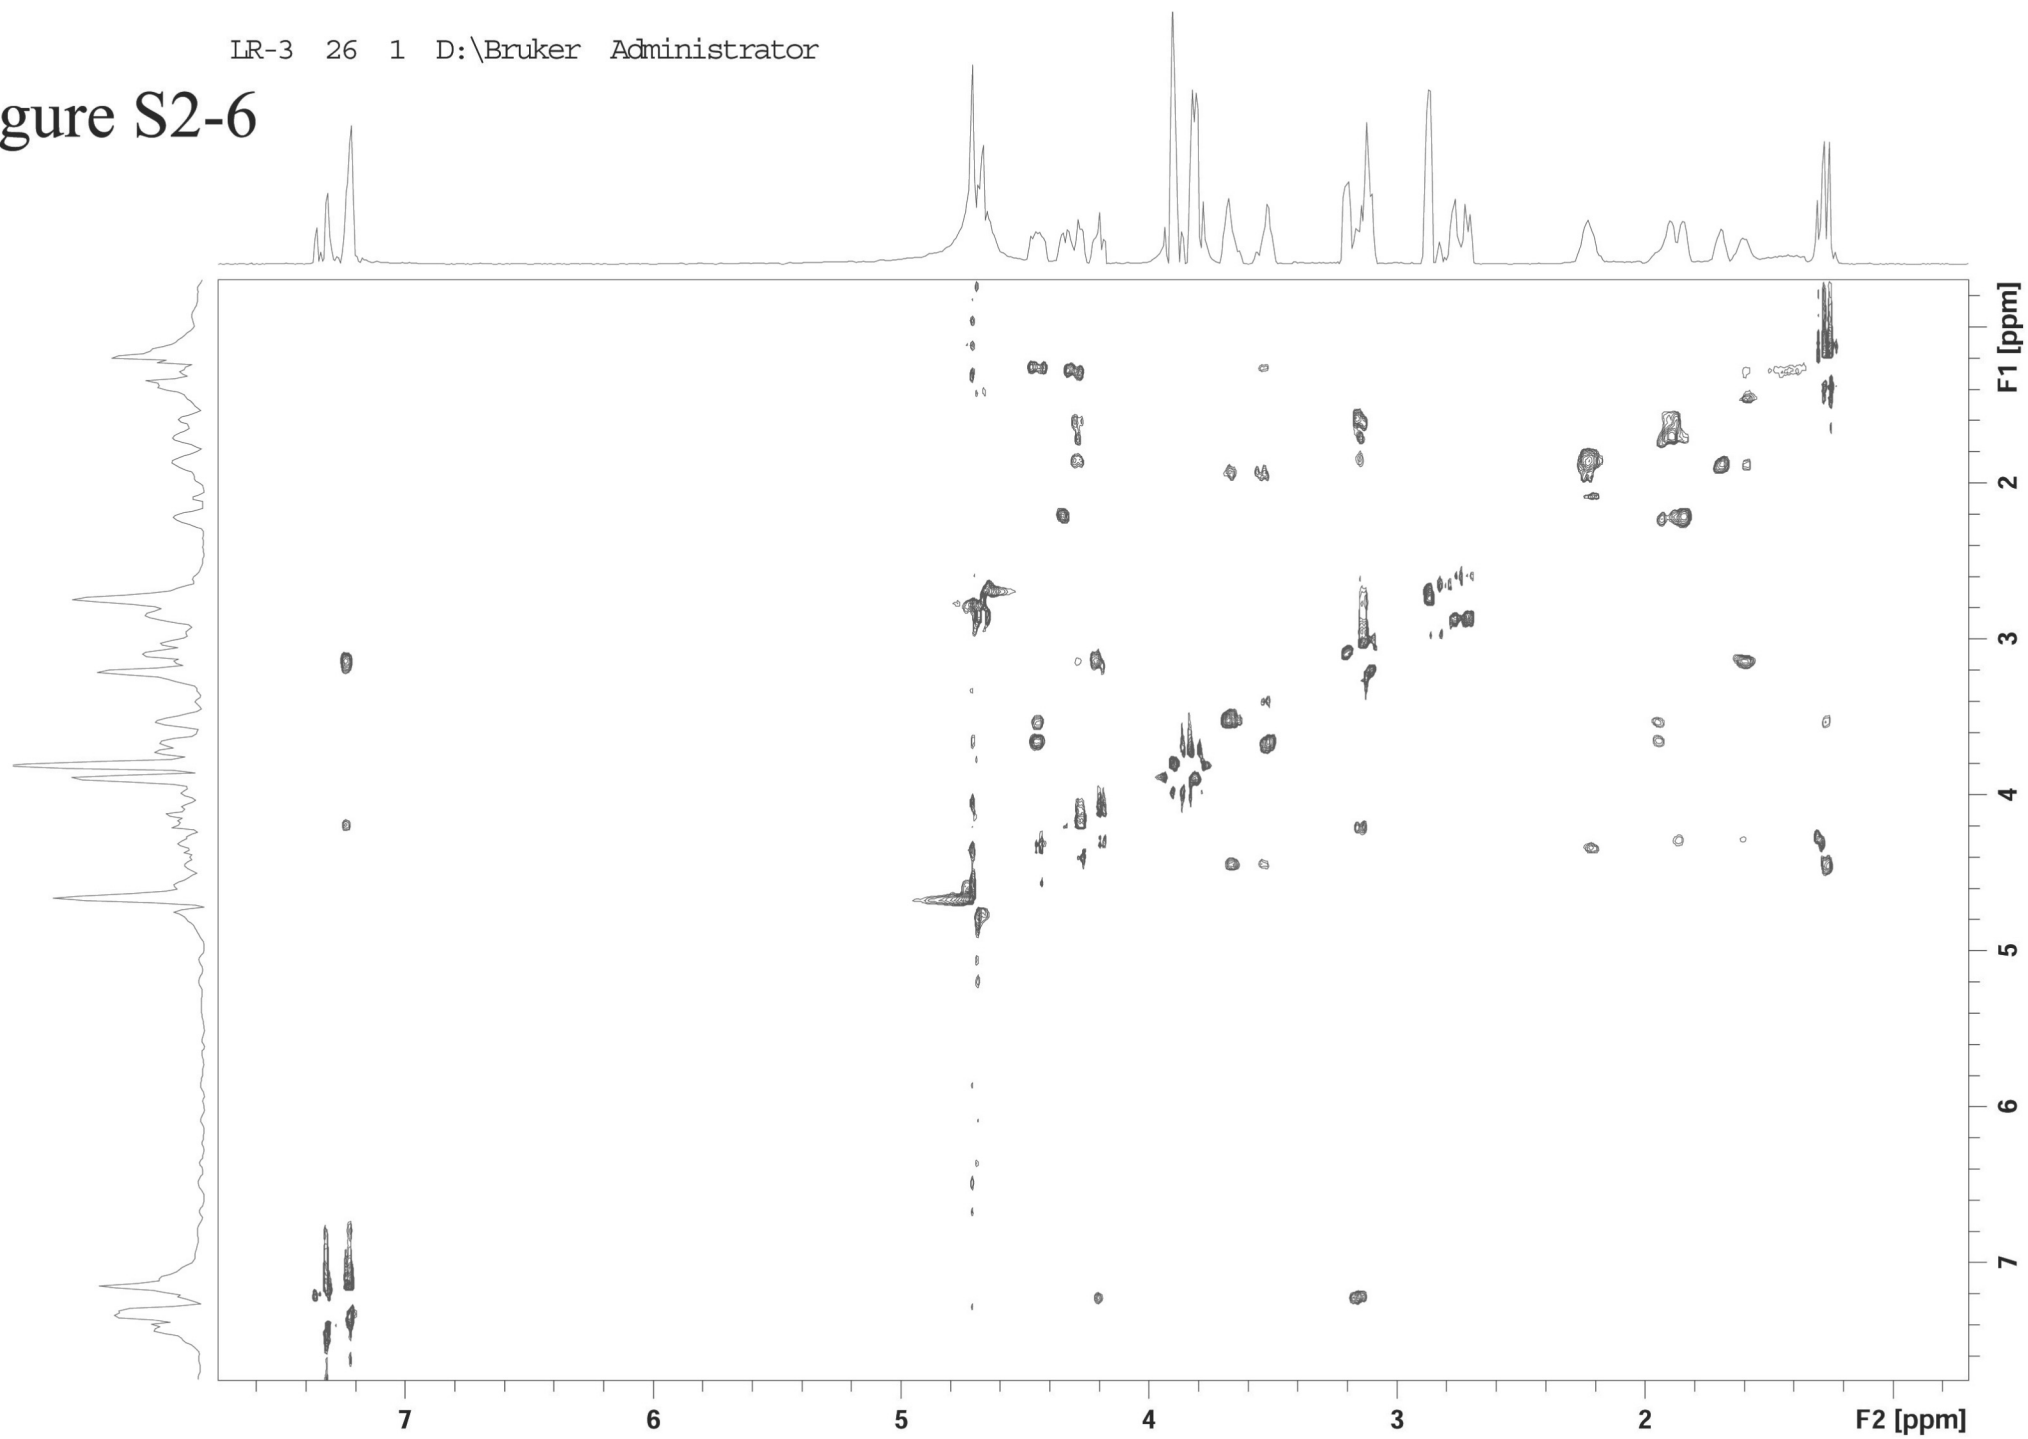

Supplement: s1 [file s1]
