# Supplementary material for: Rapid Identification of Dipeptidyl Peptidase-IV (DPP-IV) Inhibitory Peptides from Ruditapes philippinarum Hydrolysate
Source: MDPI journal article supplement (doi:10.3390/molecules22101714), 2017-10-13

**Figure captions:**

**Figure S4-1:**  $^1\text{H}$  NMR spectrum of FAGDDAPRA.

**Figure S4-2:**  $^{13}\text{C}$  NMR spectrum, DEPT90 and DEPT135 spectrum of FAGDDAPRA.

**Figure S4-3:** HMBC spectrum of FAGDDAPRA.

**Figure S4-4:** HMQC spectrum of FAGDDAPRA.

**Figure S4-5:** COSY spectrum of FAGDDAPRA.

**Figure S4-6:** ROESY spectrum of FAGDDAPRA.

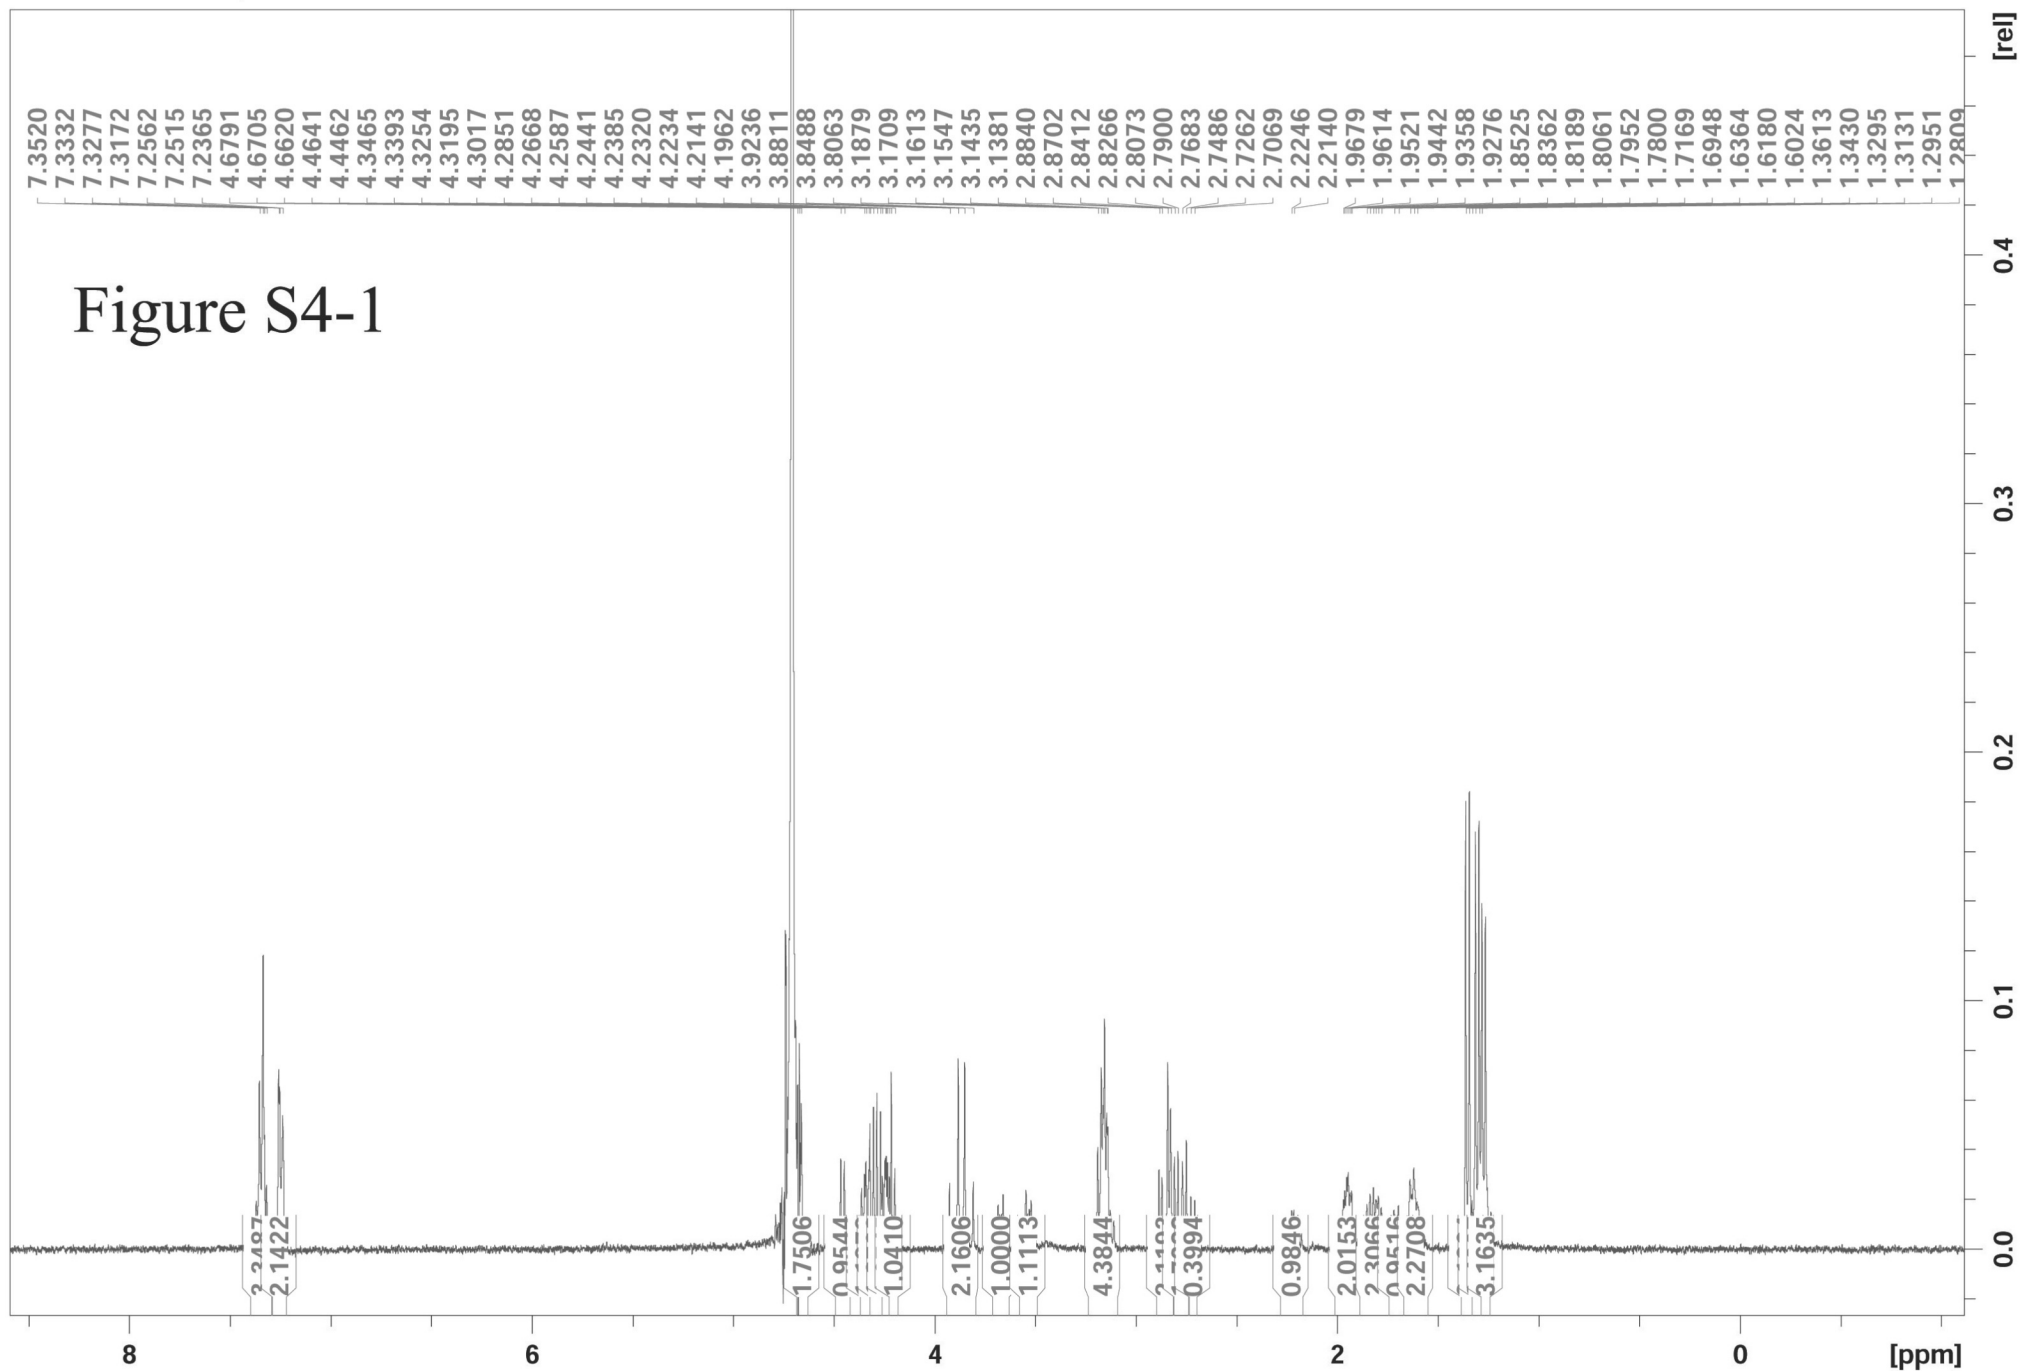

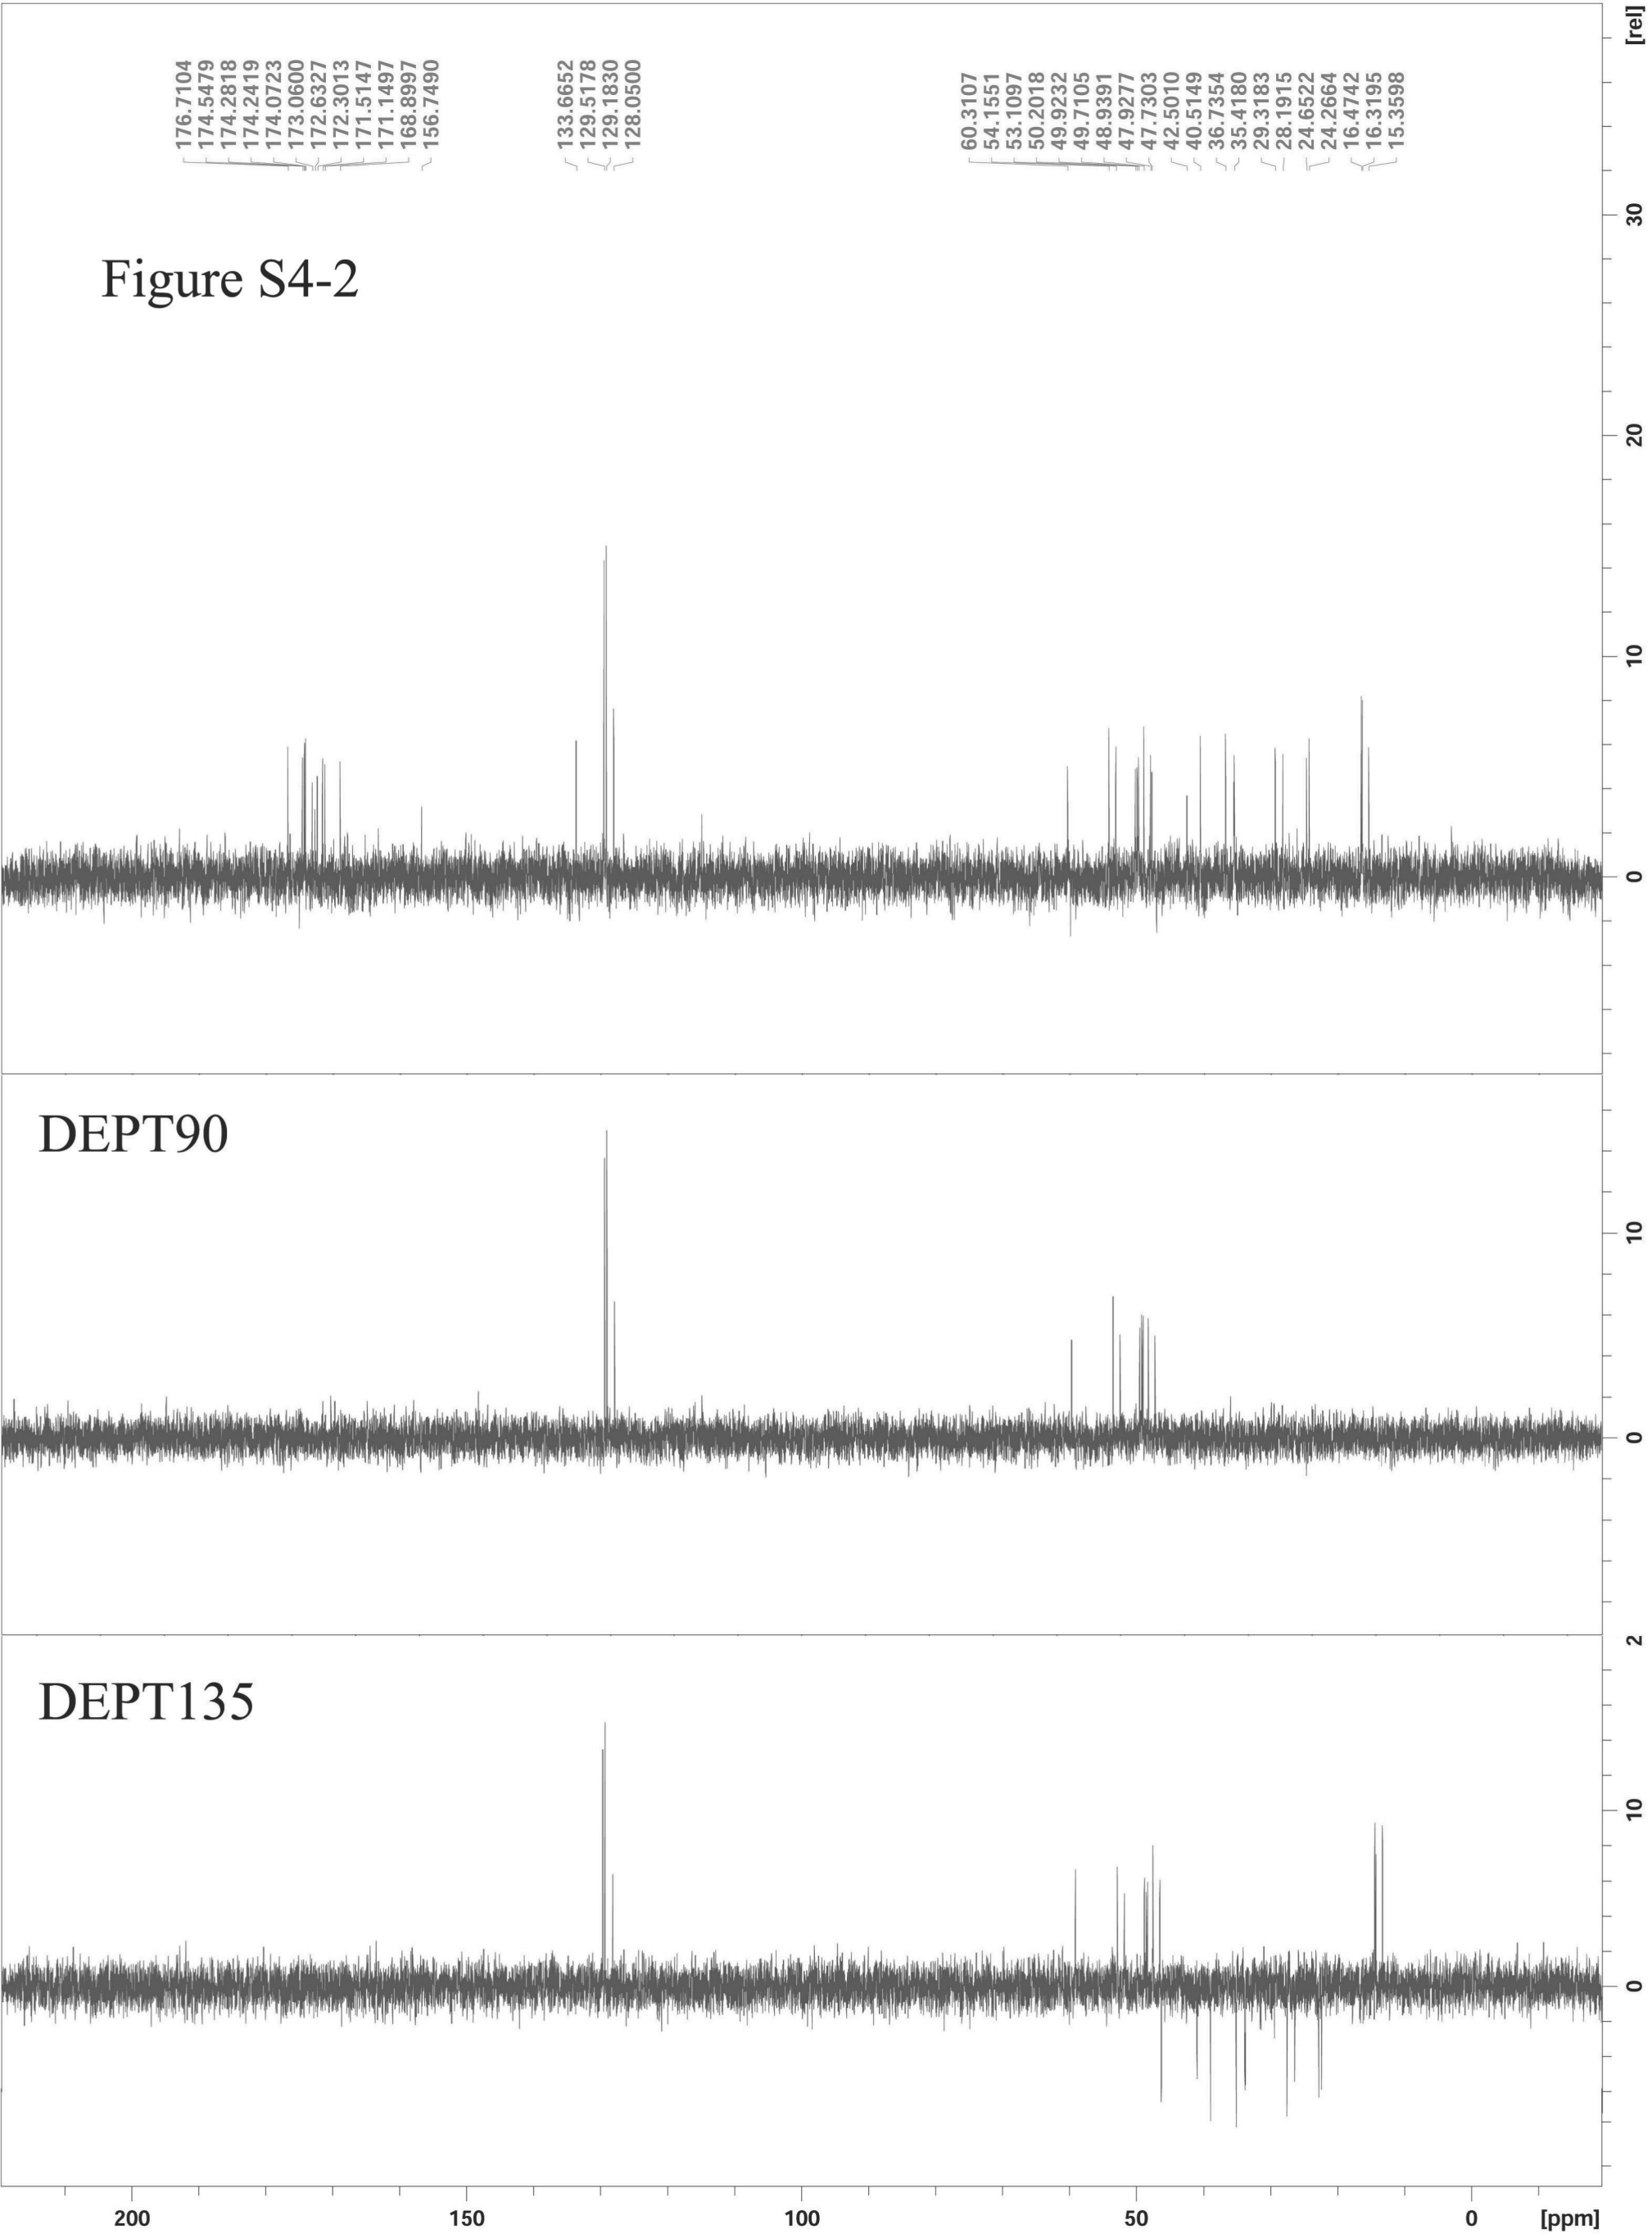

Figure S4-3

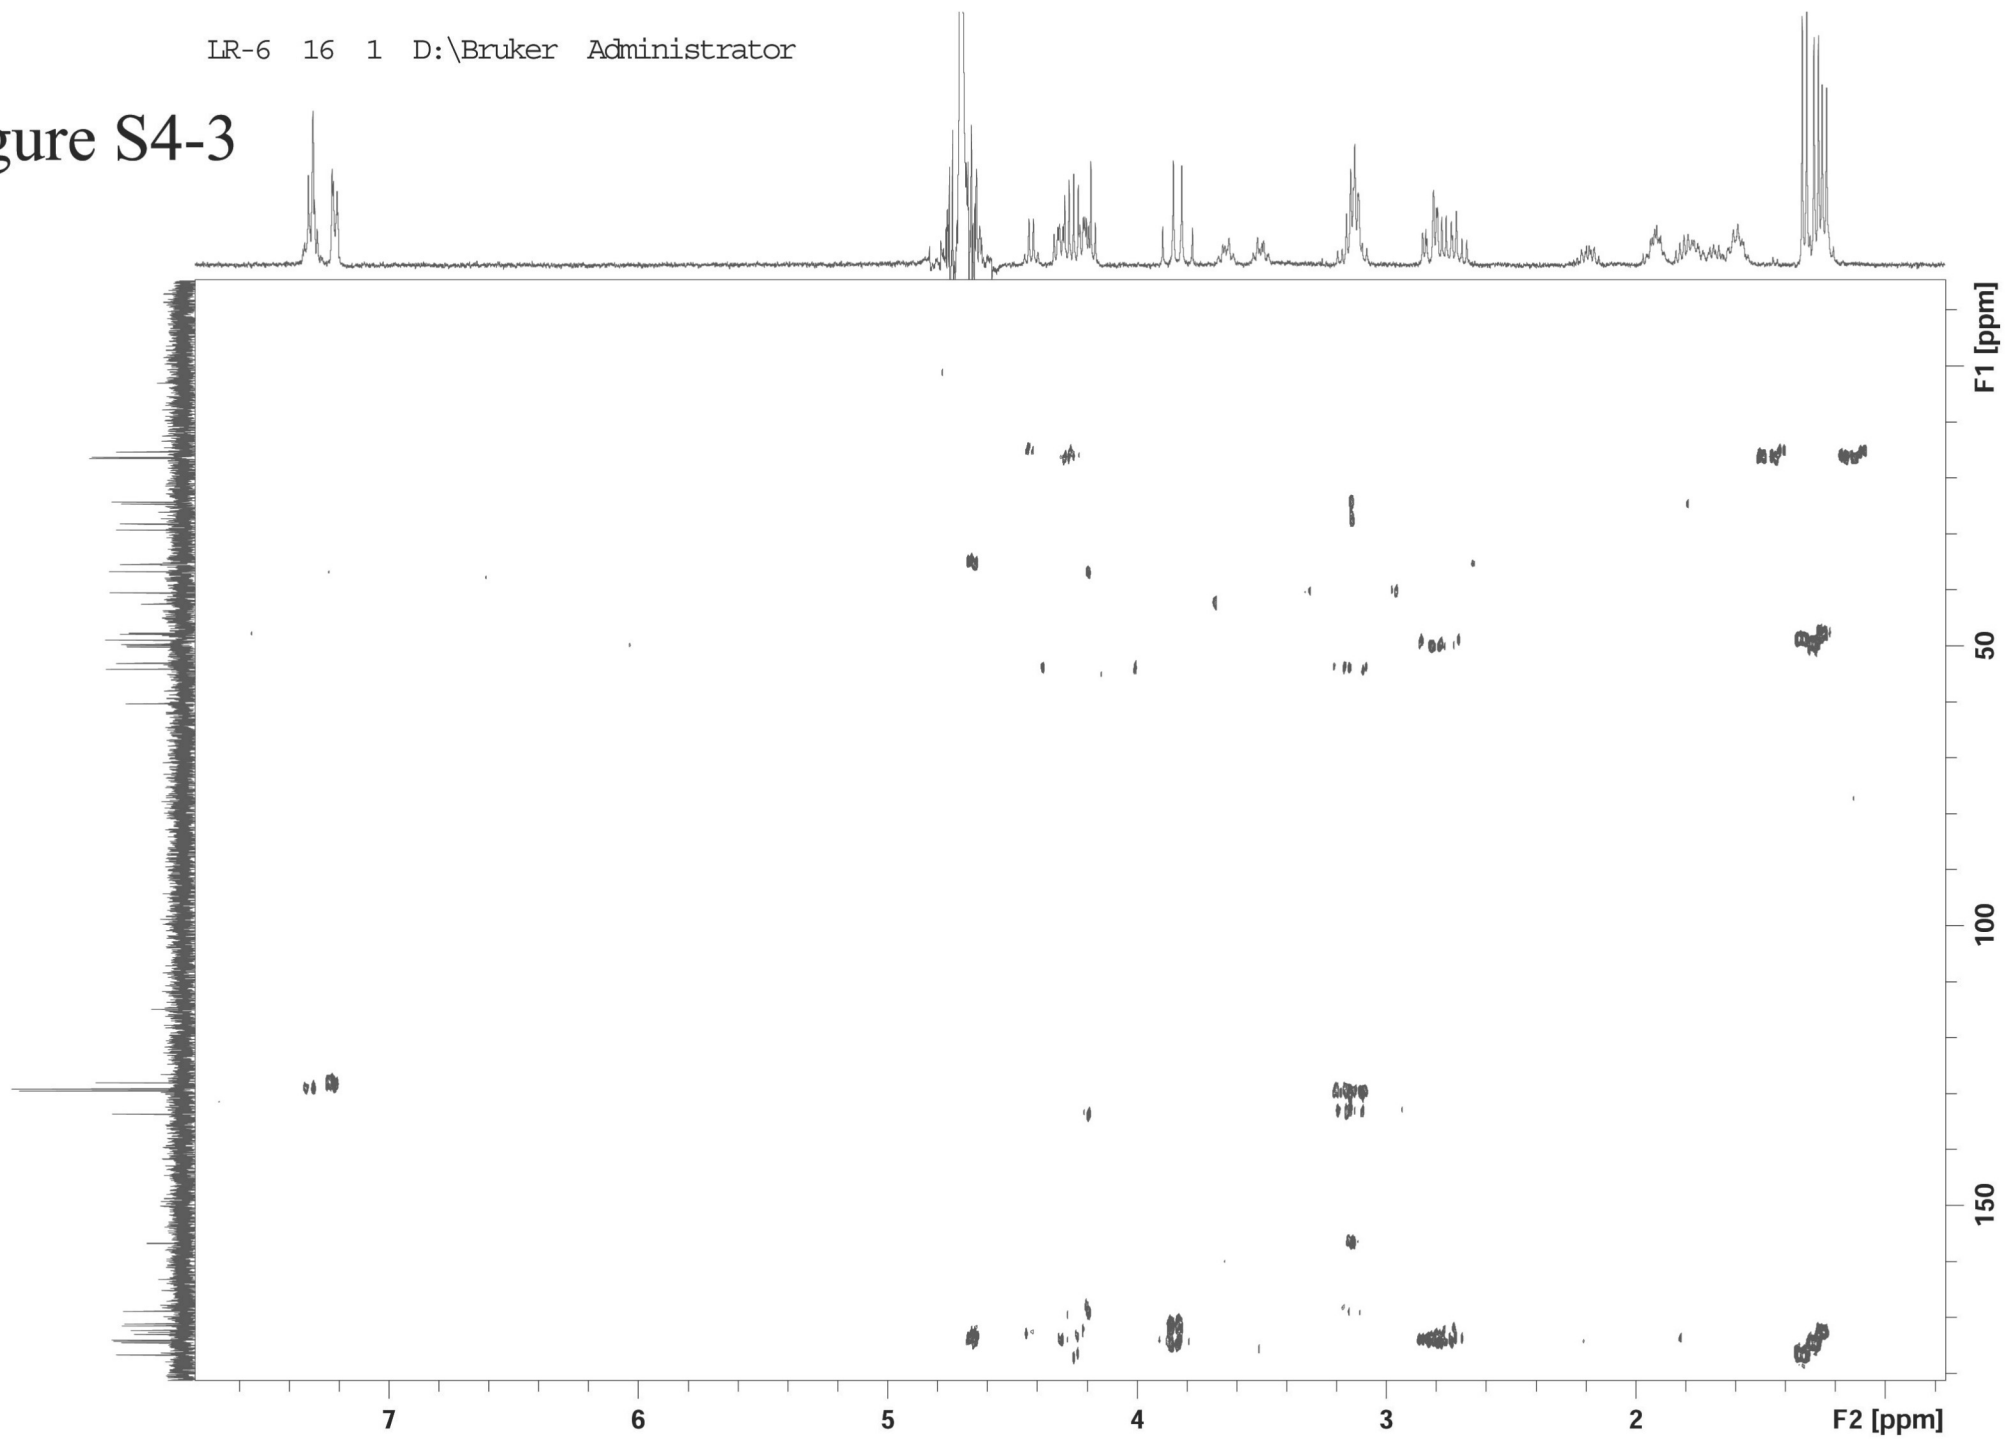

Figure S4-4

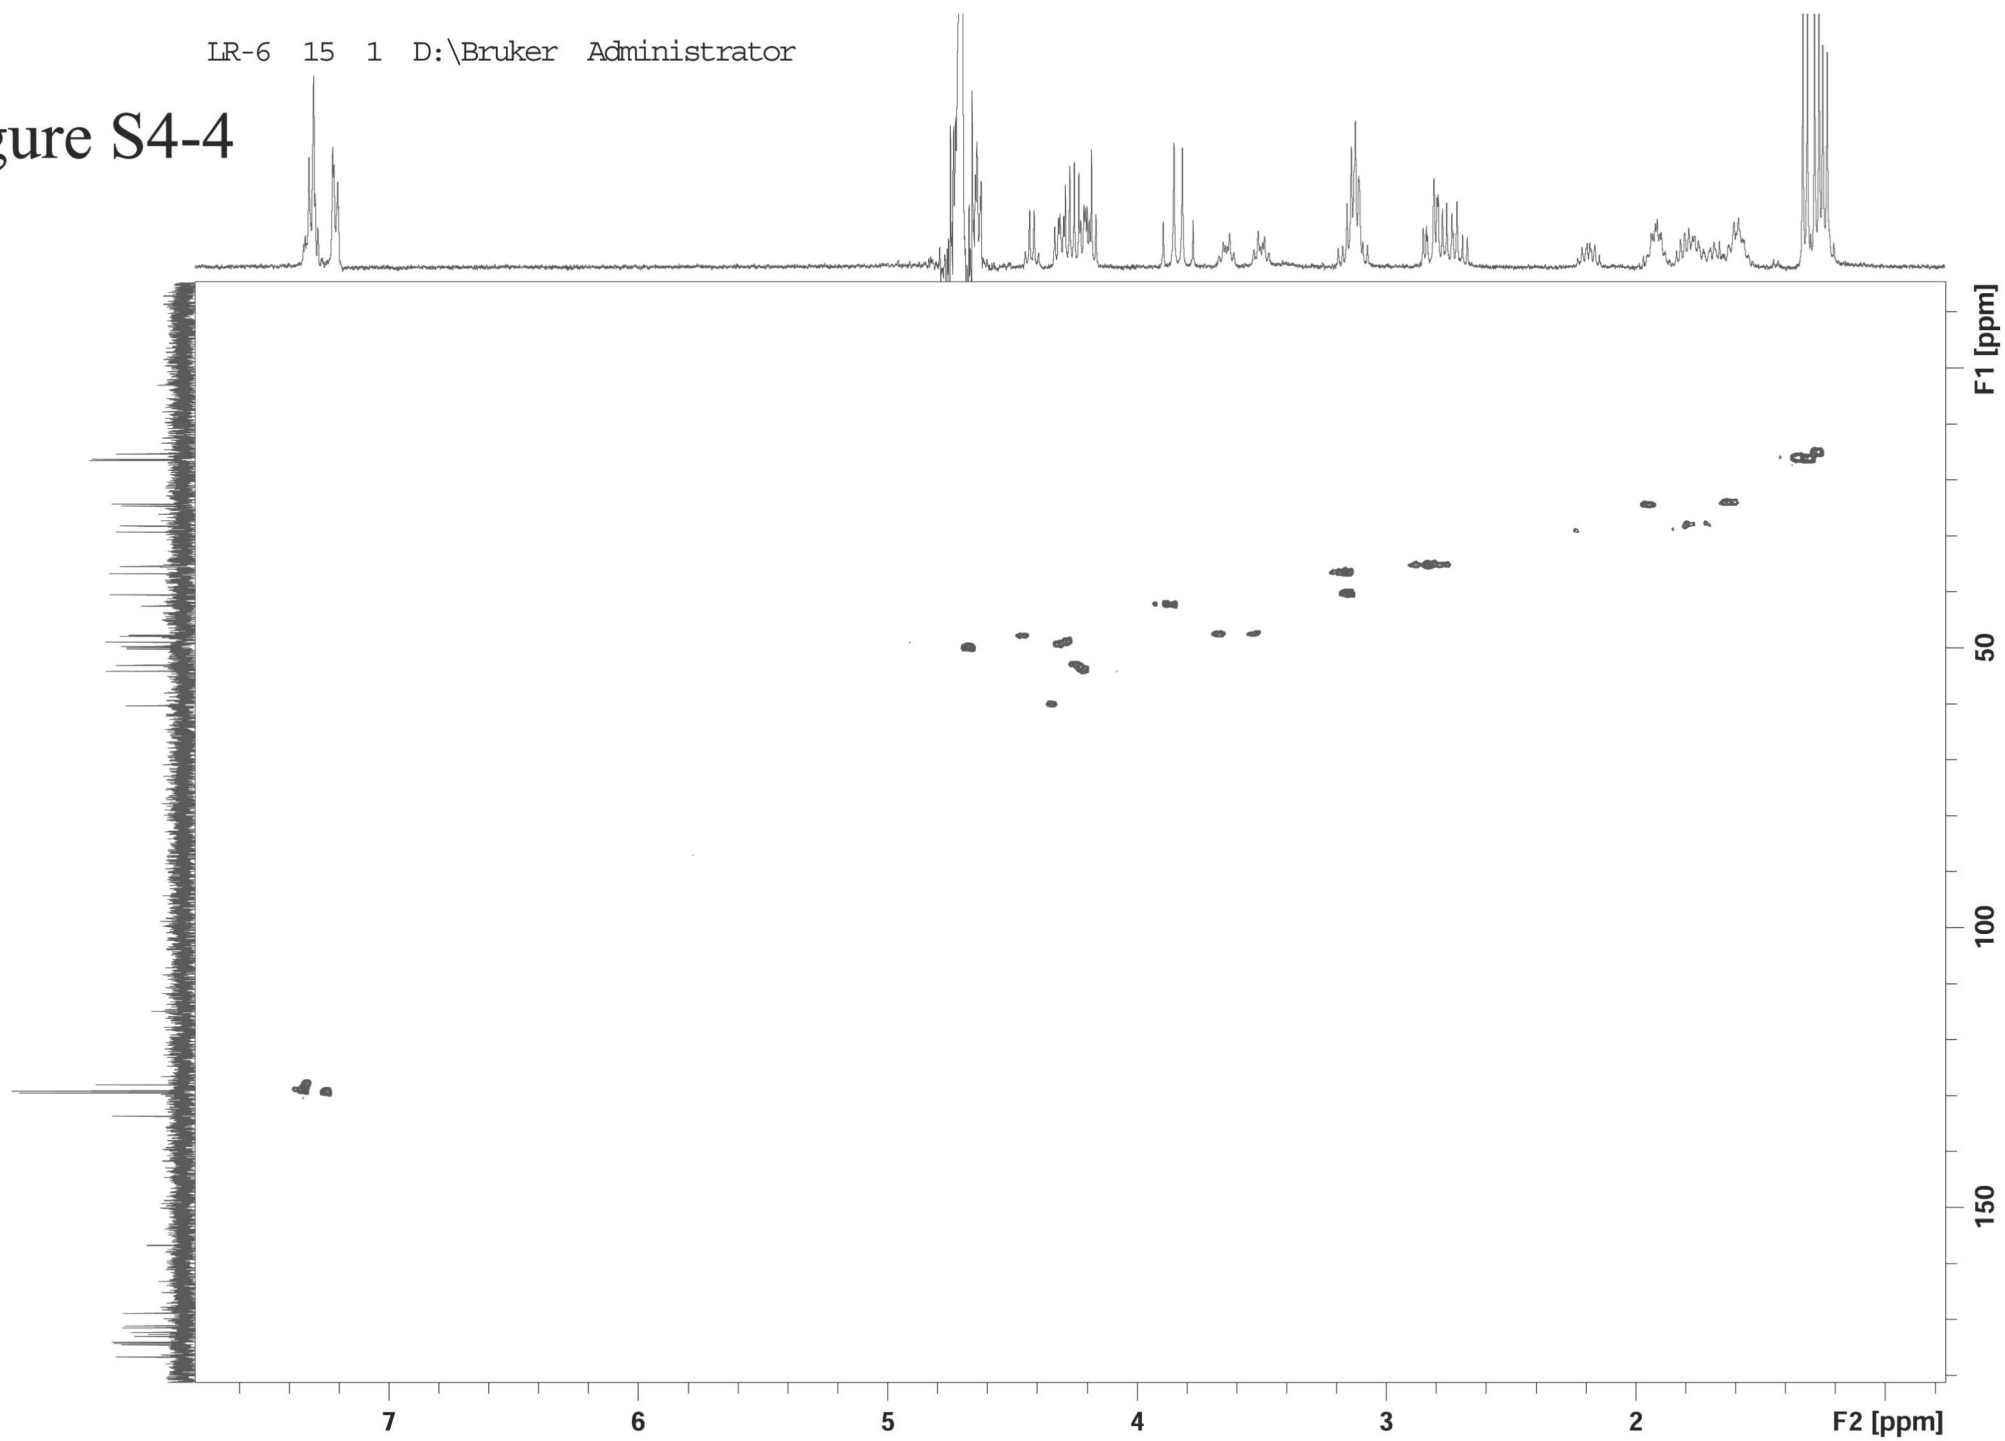

Figure S4-5

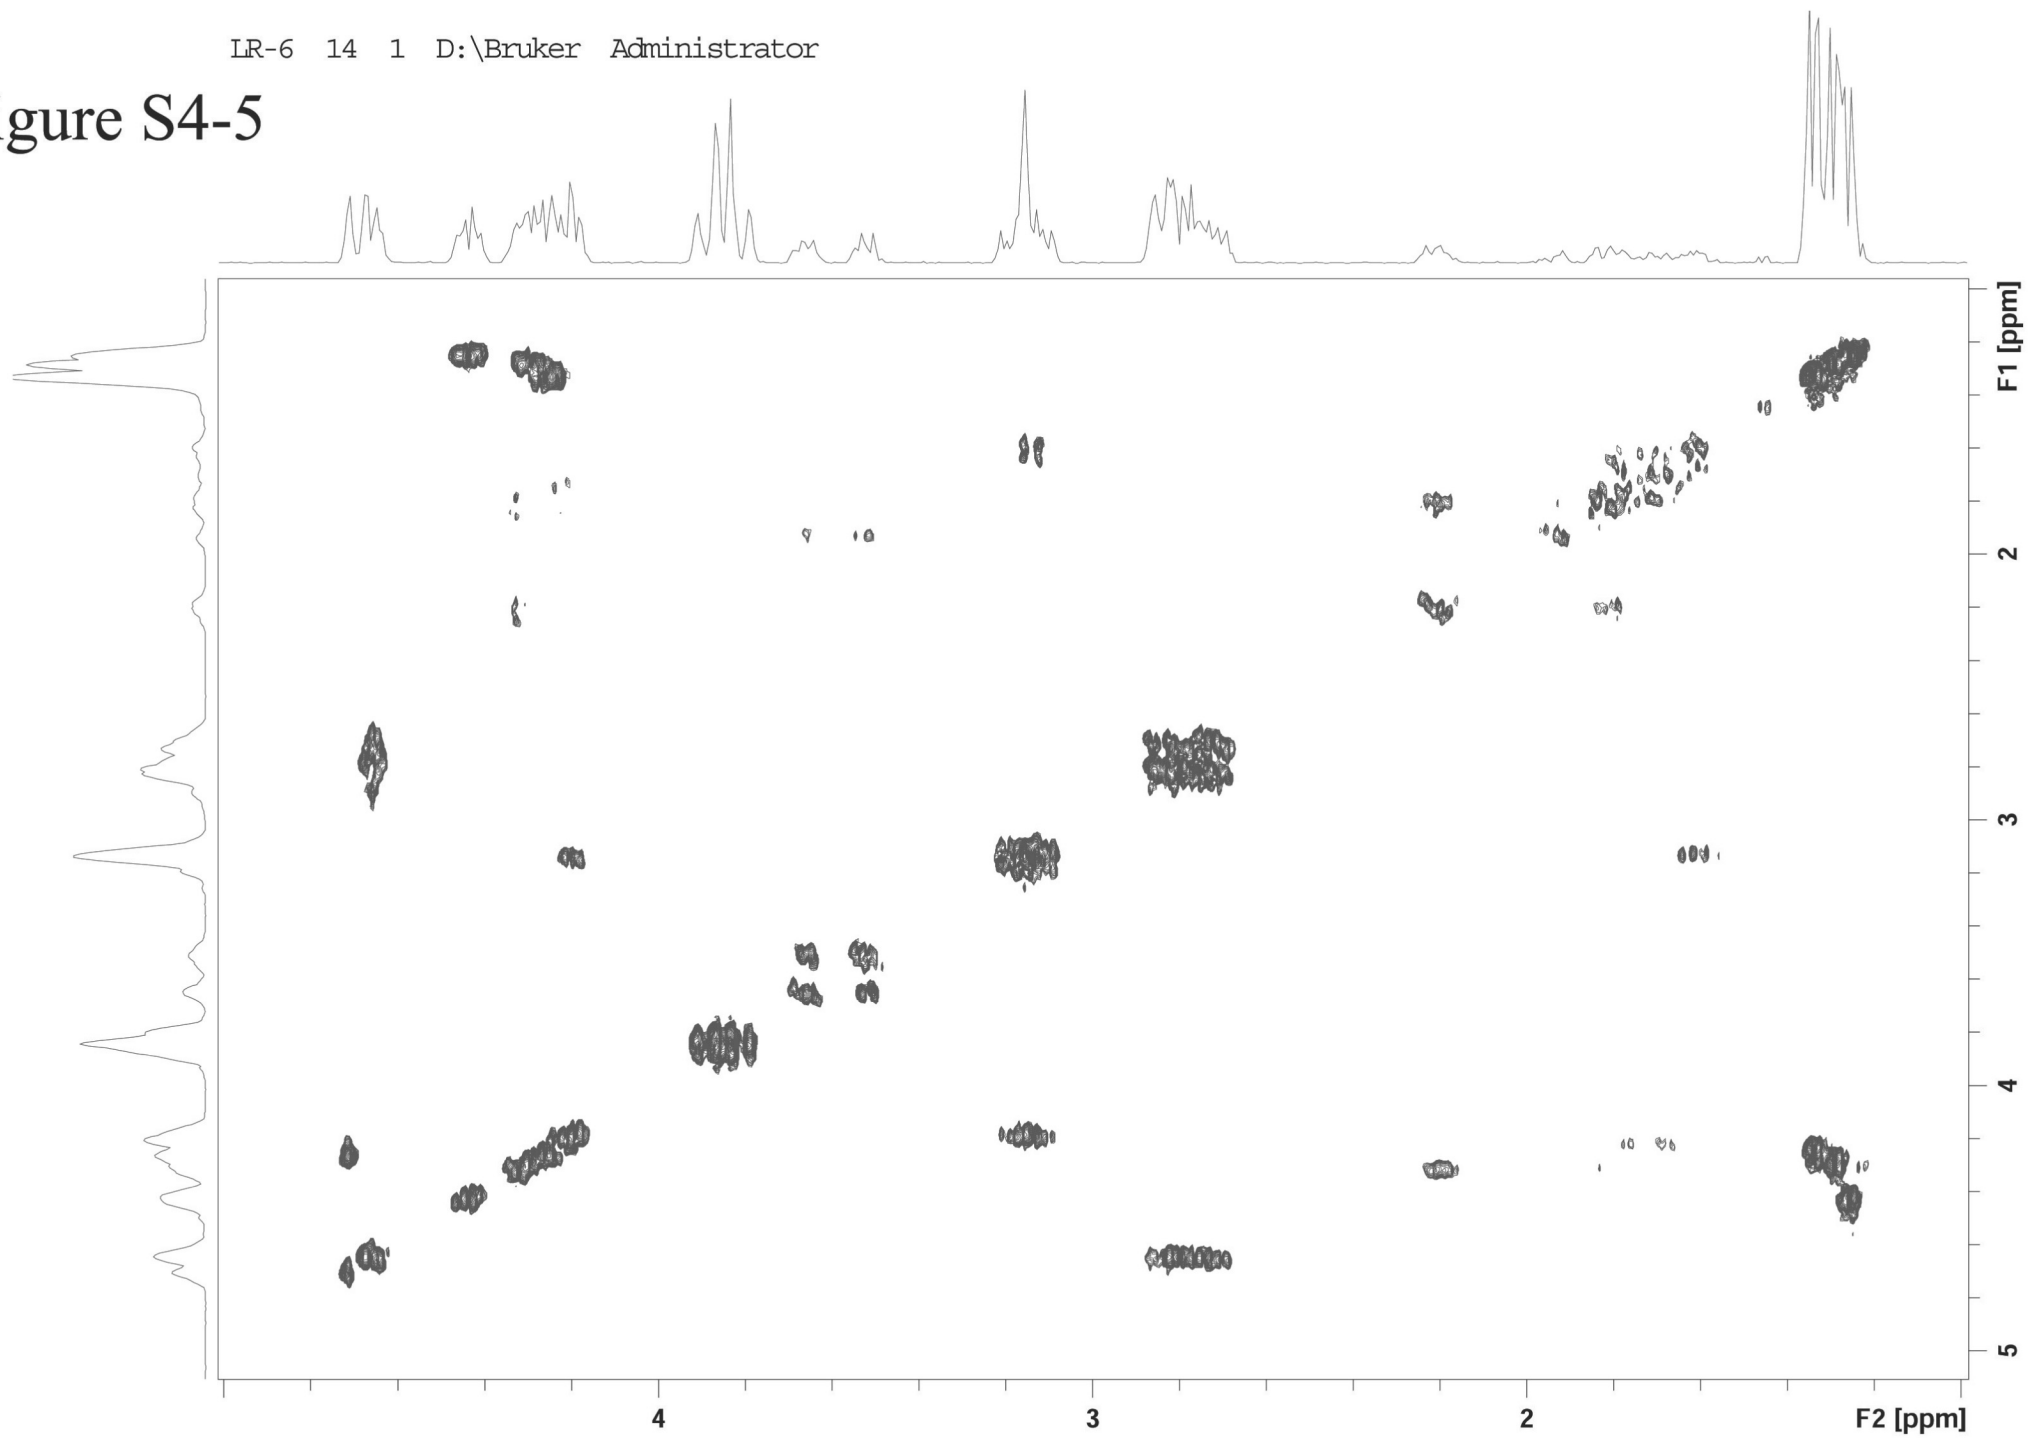

Figure S4-6

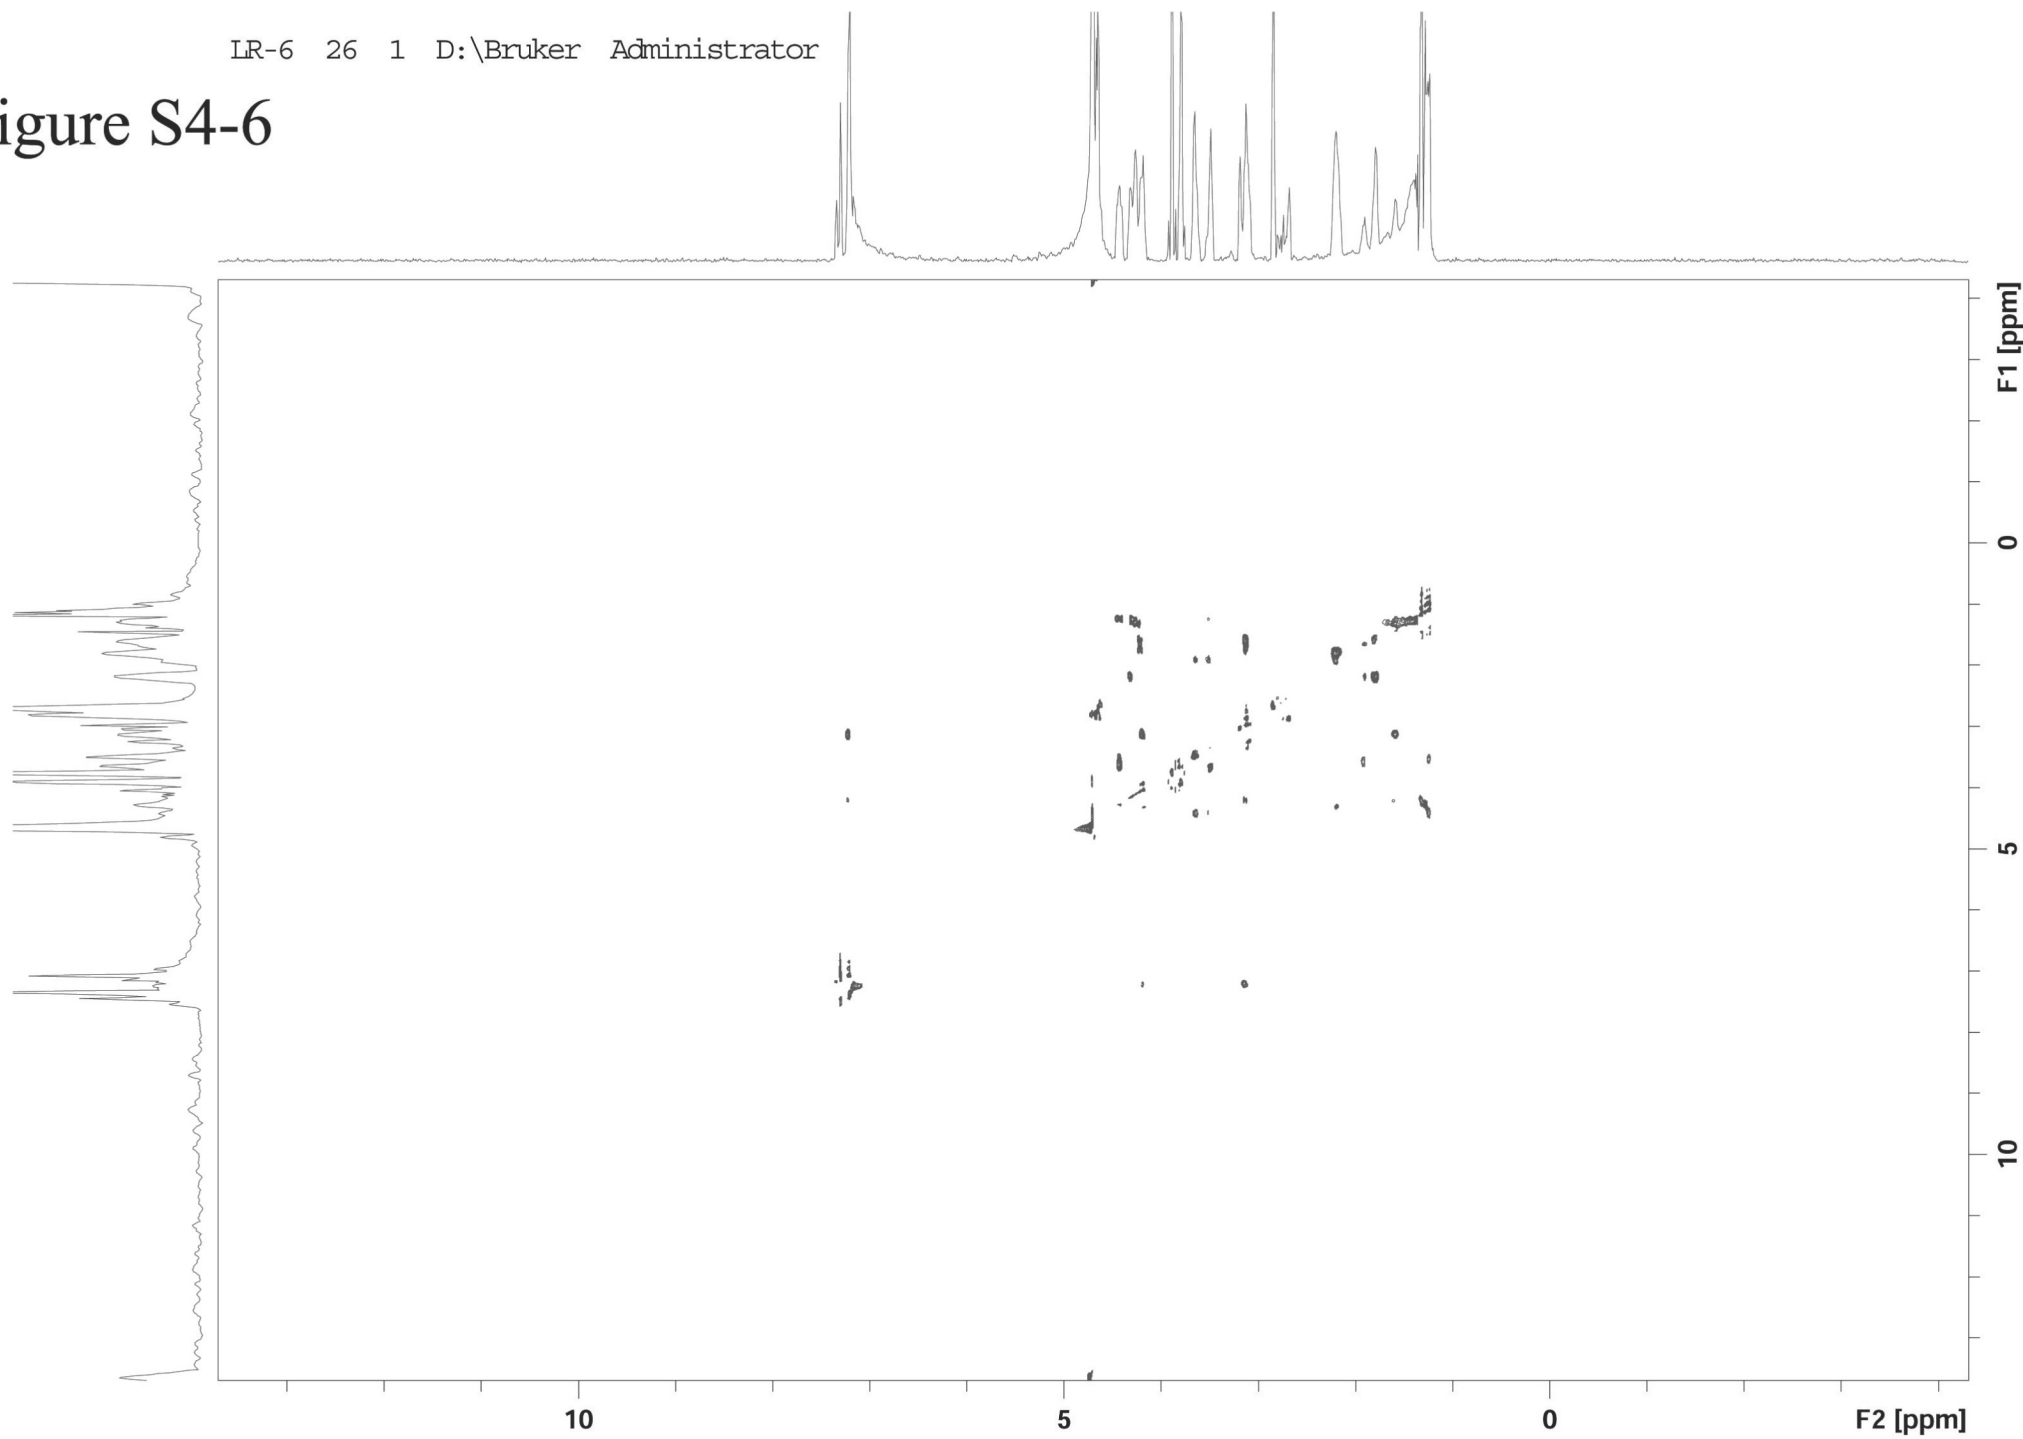

Supplement: s1 [file s1]
