# Supplementary material for: Rapid Identification of Dipeptidyl Peptidase-IV (DPP-IV) Inhibitory Peptides from Ruditapes philippinarum Hydrolysate
Source: MDPI journal article supplement (doi:10.3390/molecules22101714), 2017-10-13

**Figure captions:**

**Figure S5-1:**  $^1\text{H}$  NMR spectrum of FLMESH.

**Figure S5-2:**  $^{13}\text{C}$  NMR spectrum, DEPT90 and DEPT135 spectrum of FLMESH.

**Figure S5-3:** HMBC spectrum of FLMESH.

**Figure S5-4:** HMQC spectrum of FLMESH.

**Figure S5-5:** COSY spectrum of FLMESH.

**Figure S5-6:** ROESY spectrum of FLMESH.

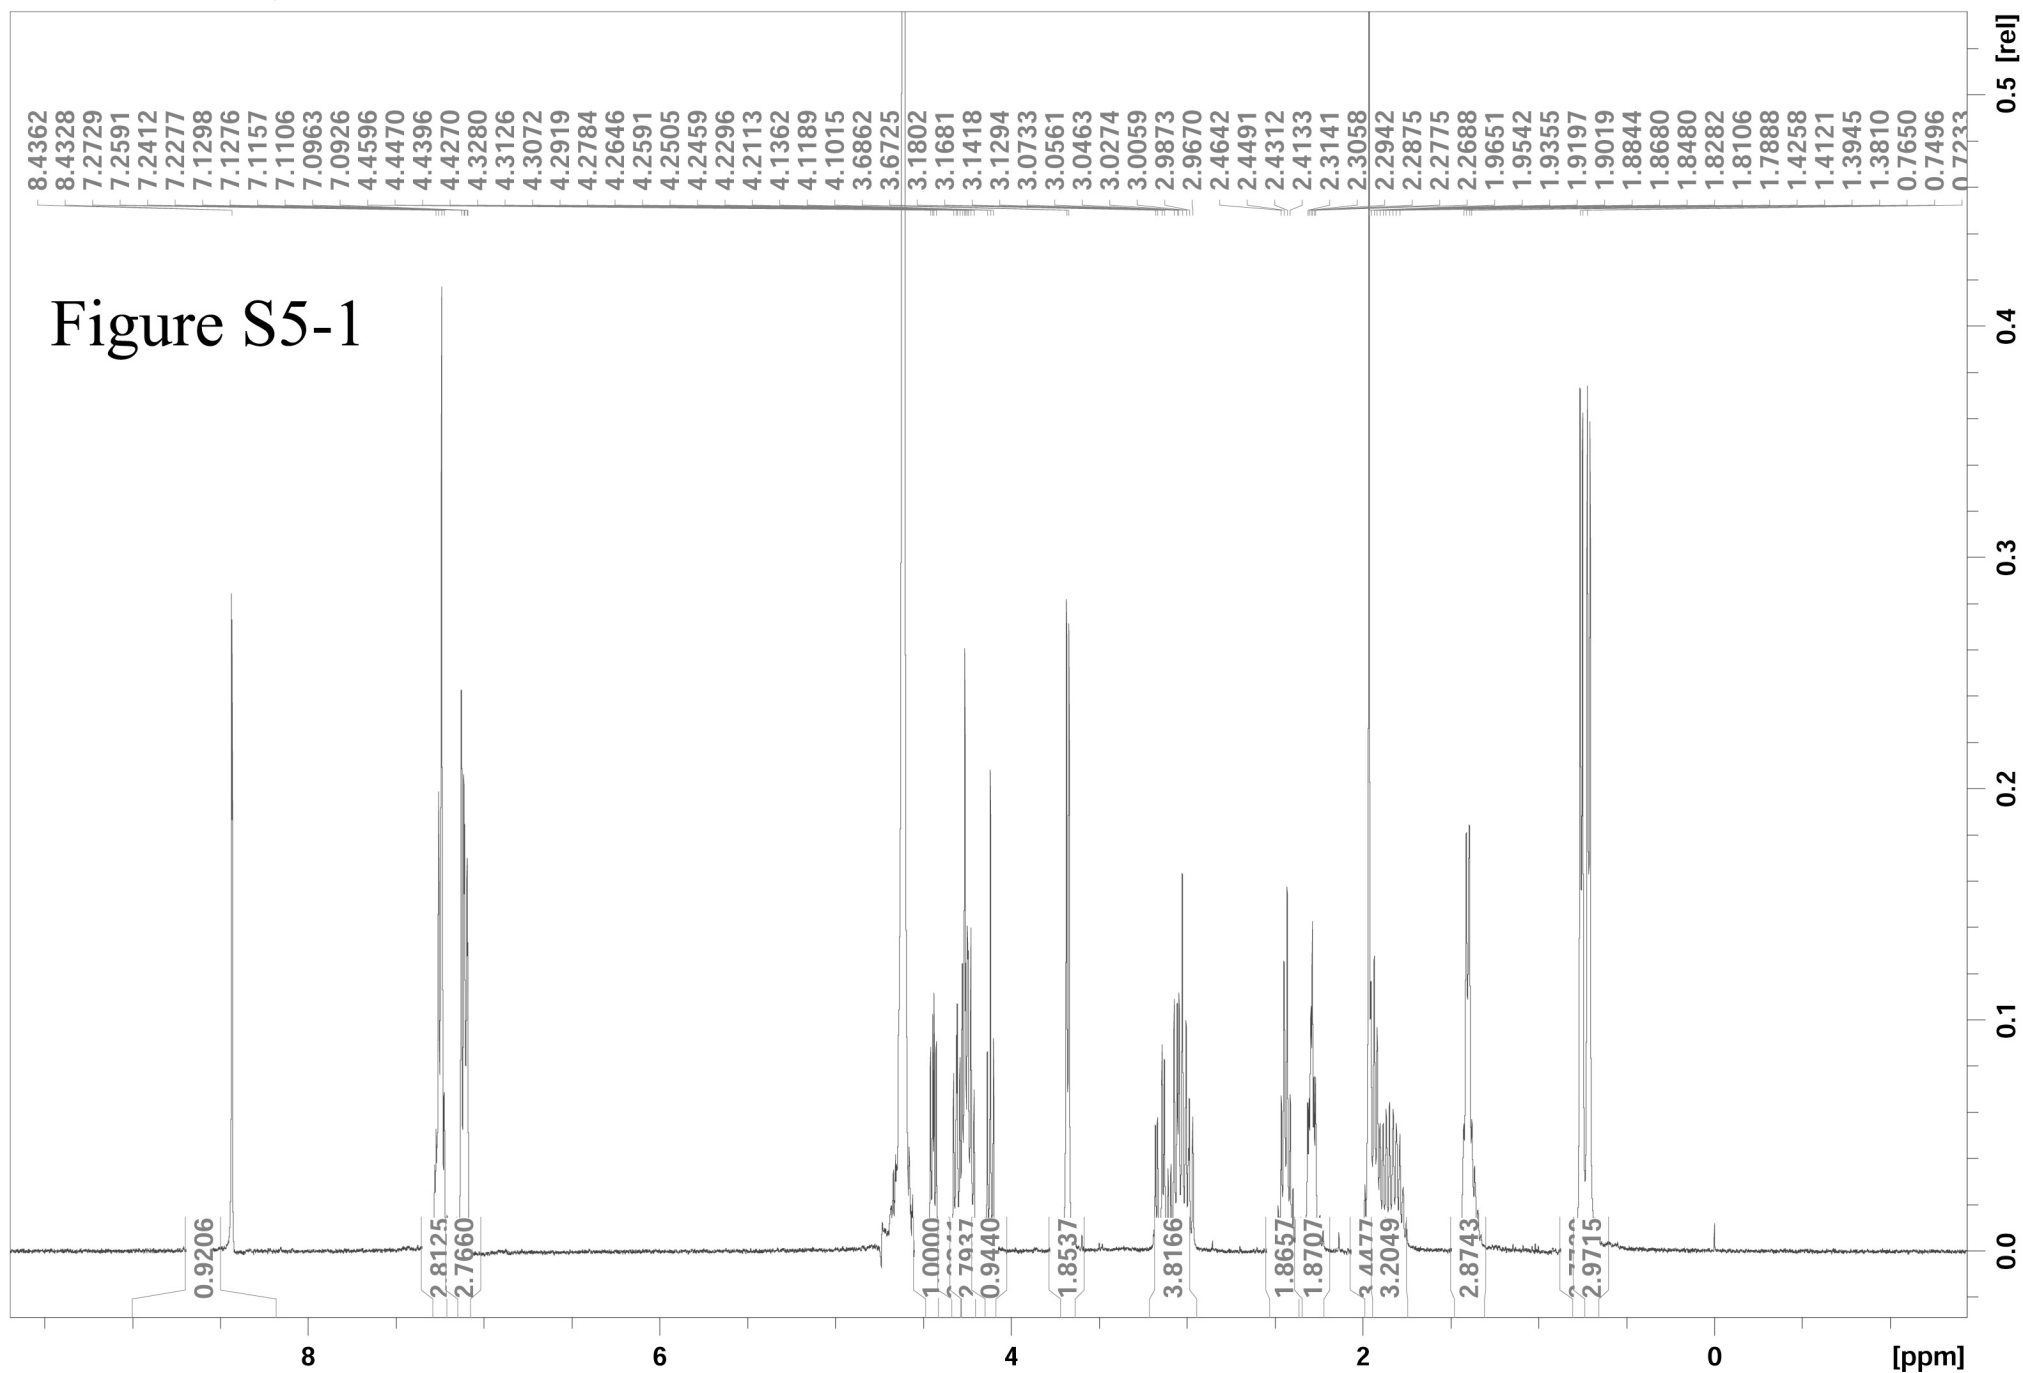

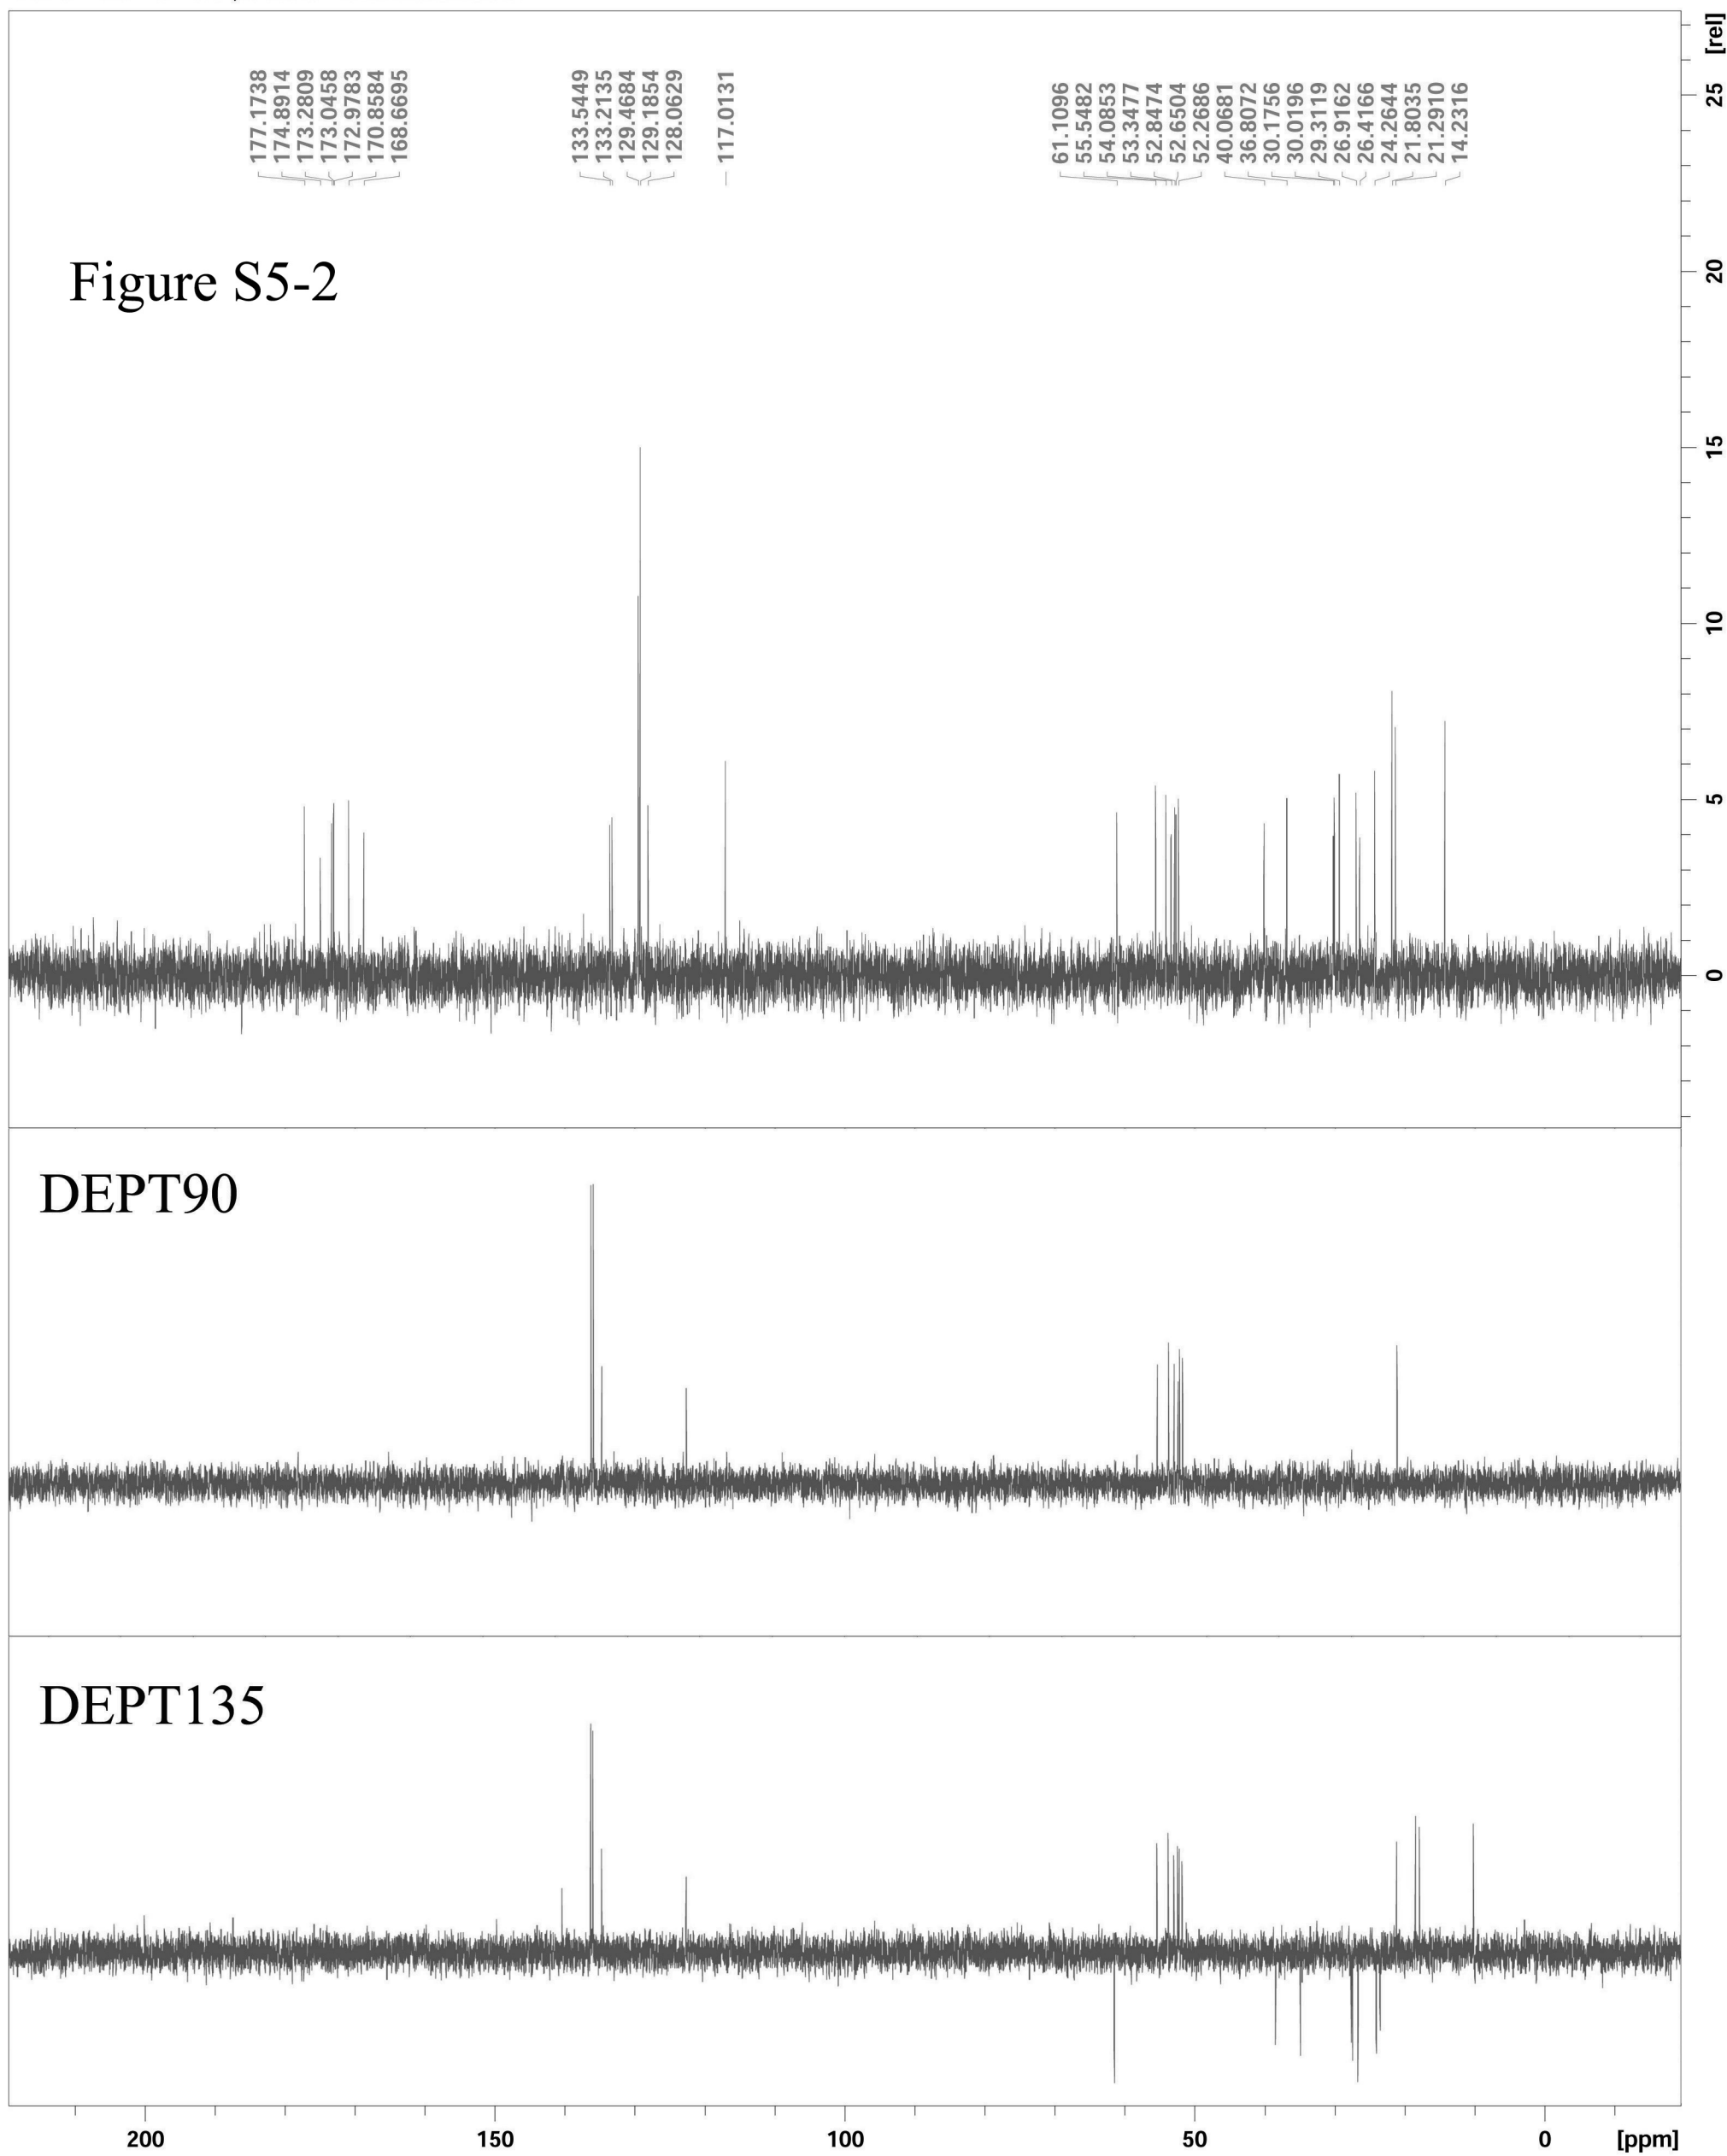

Figure S5-3

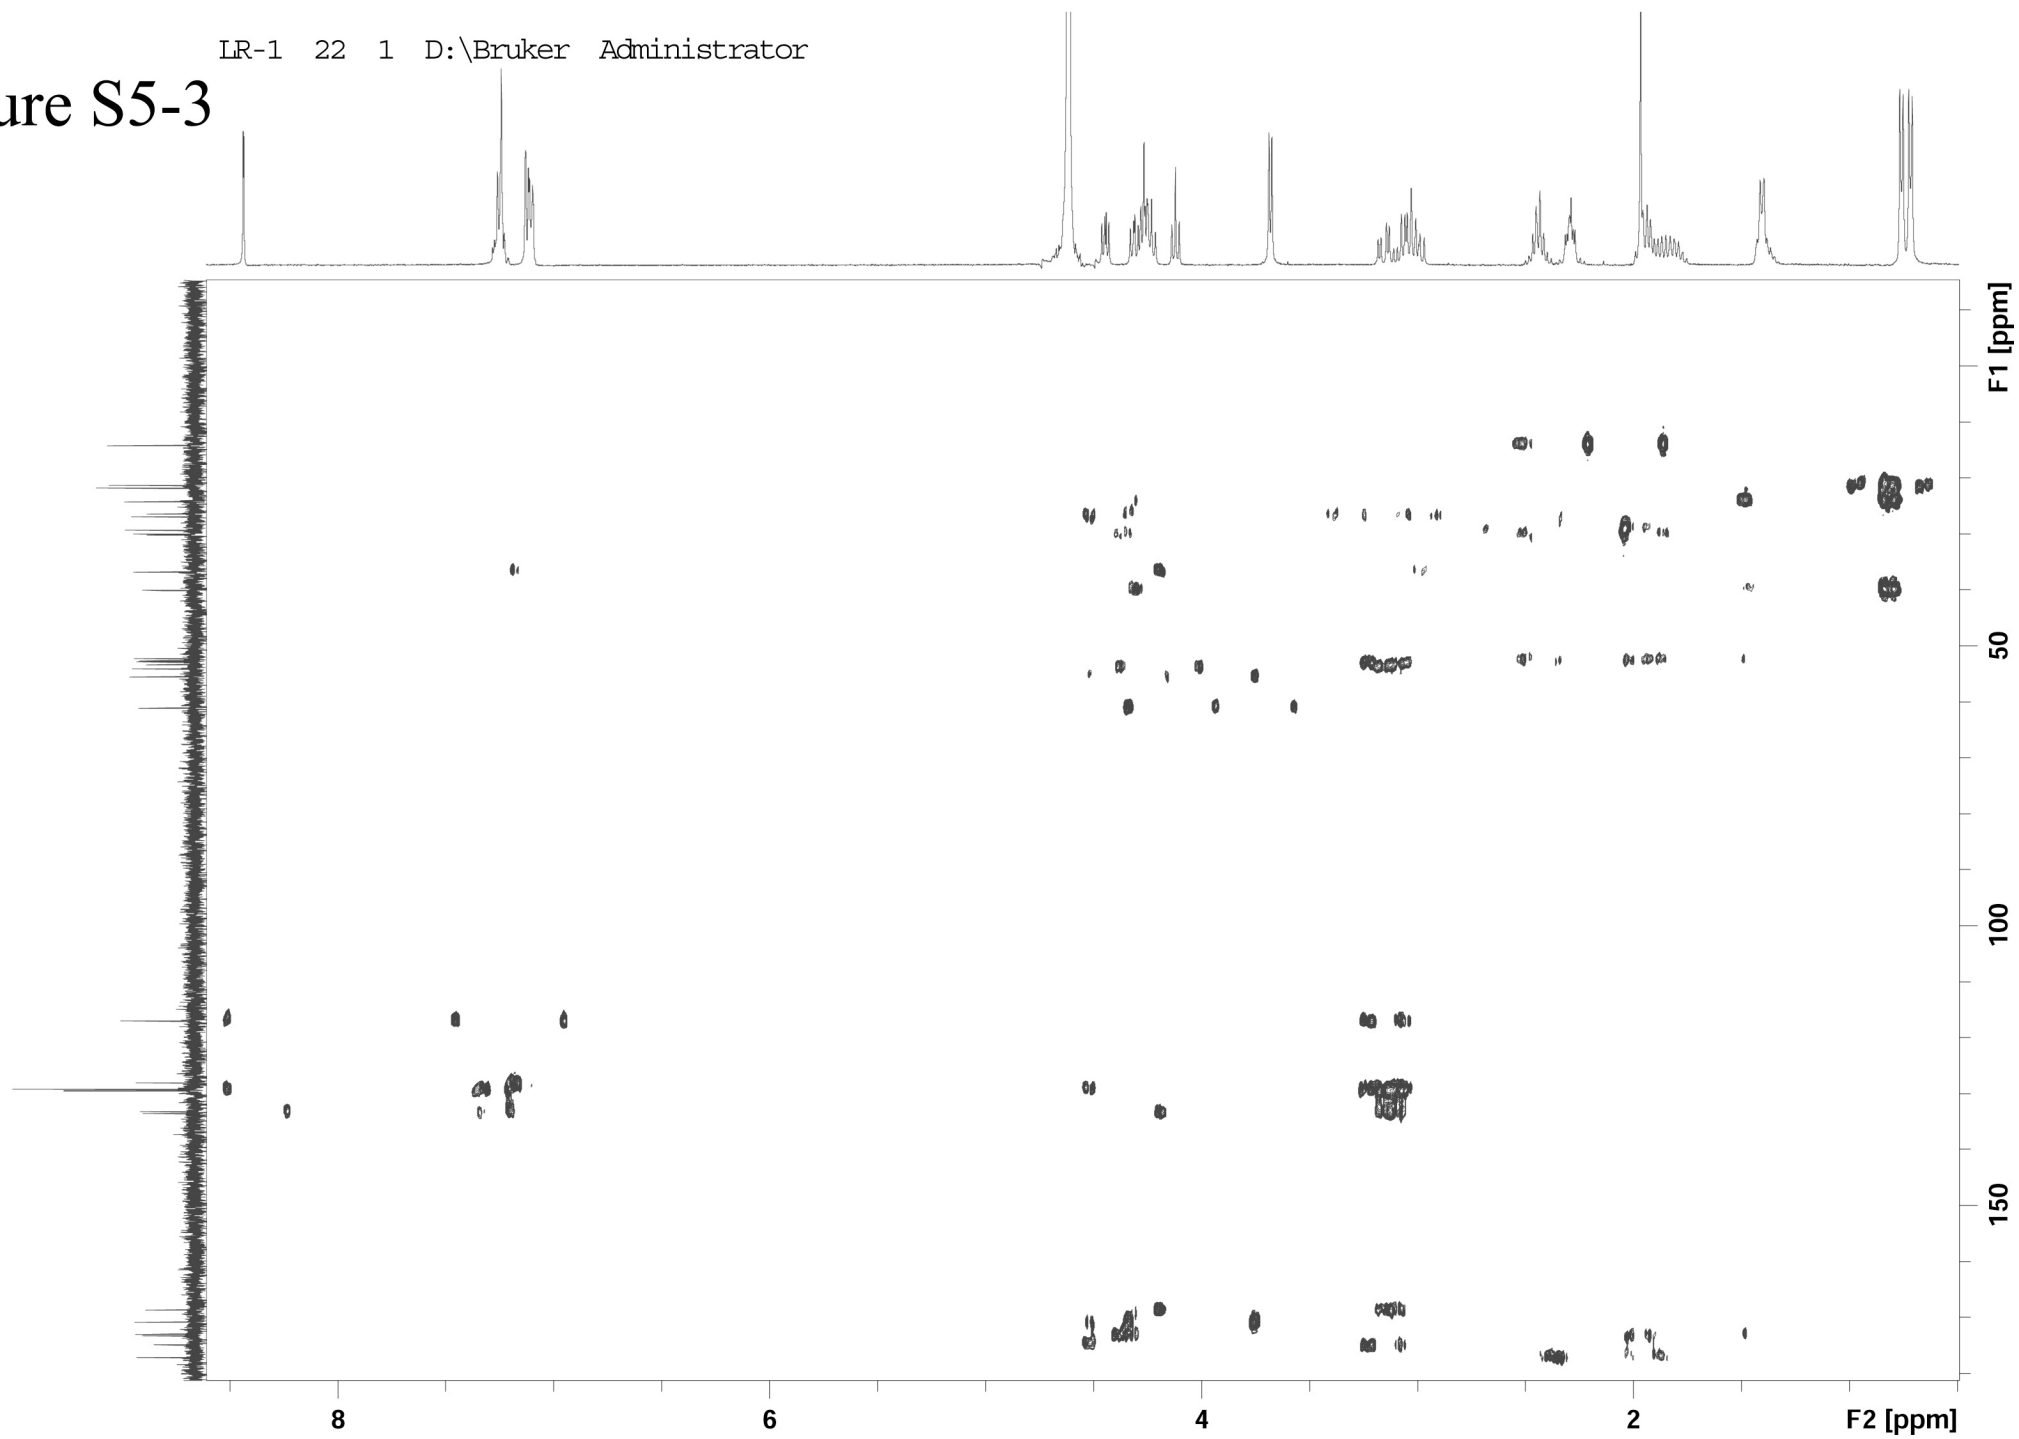

Figure S5-4

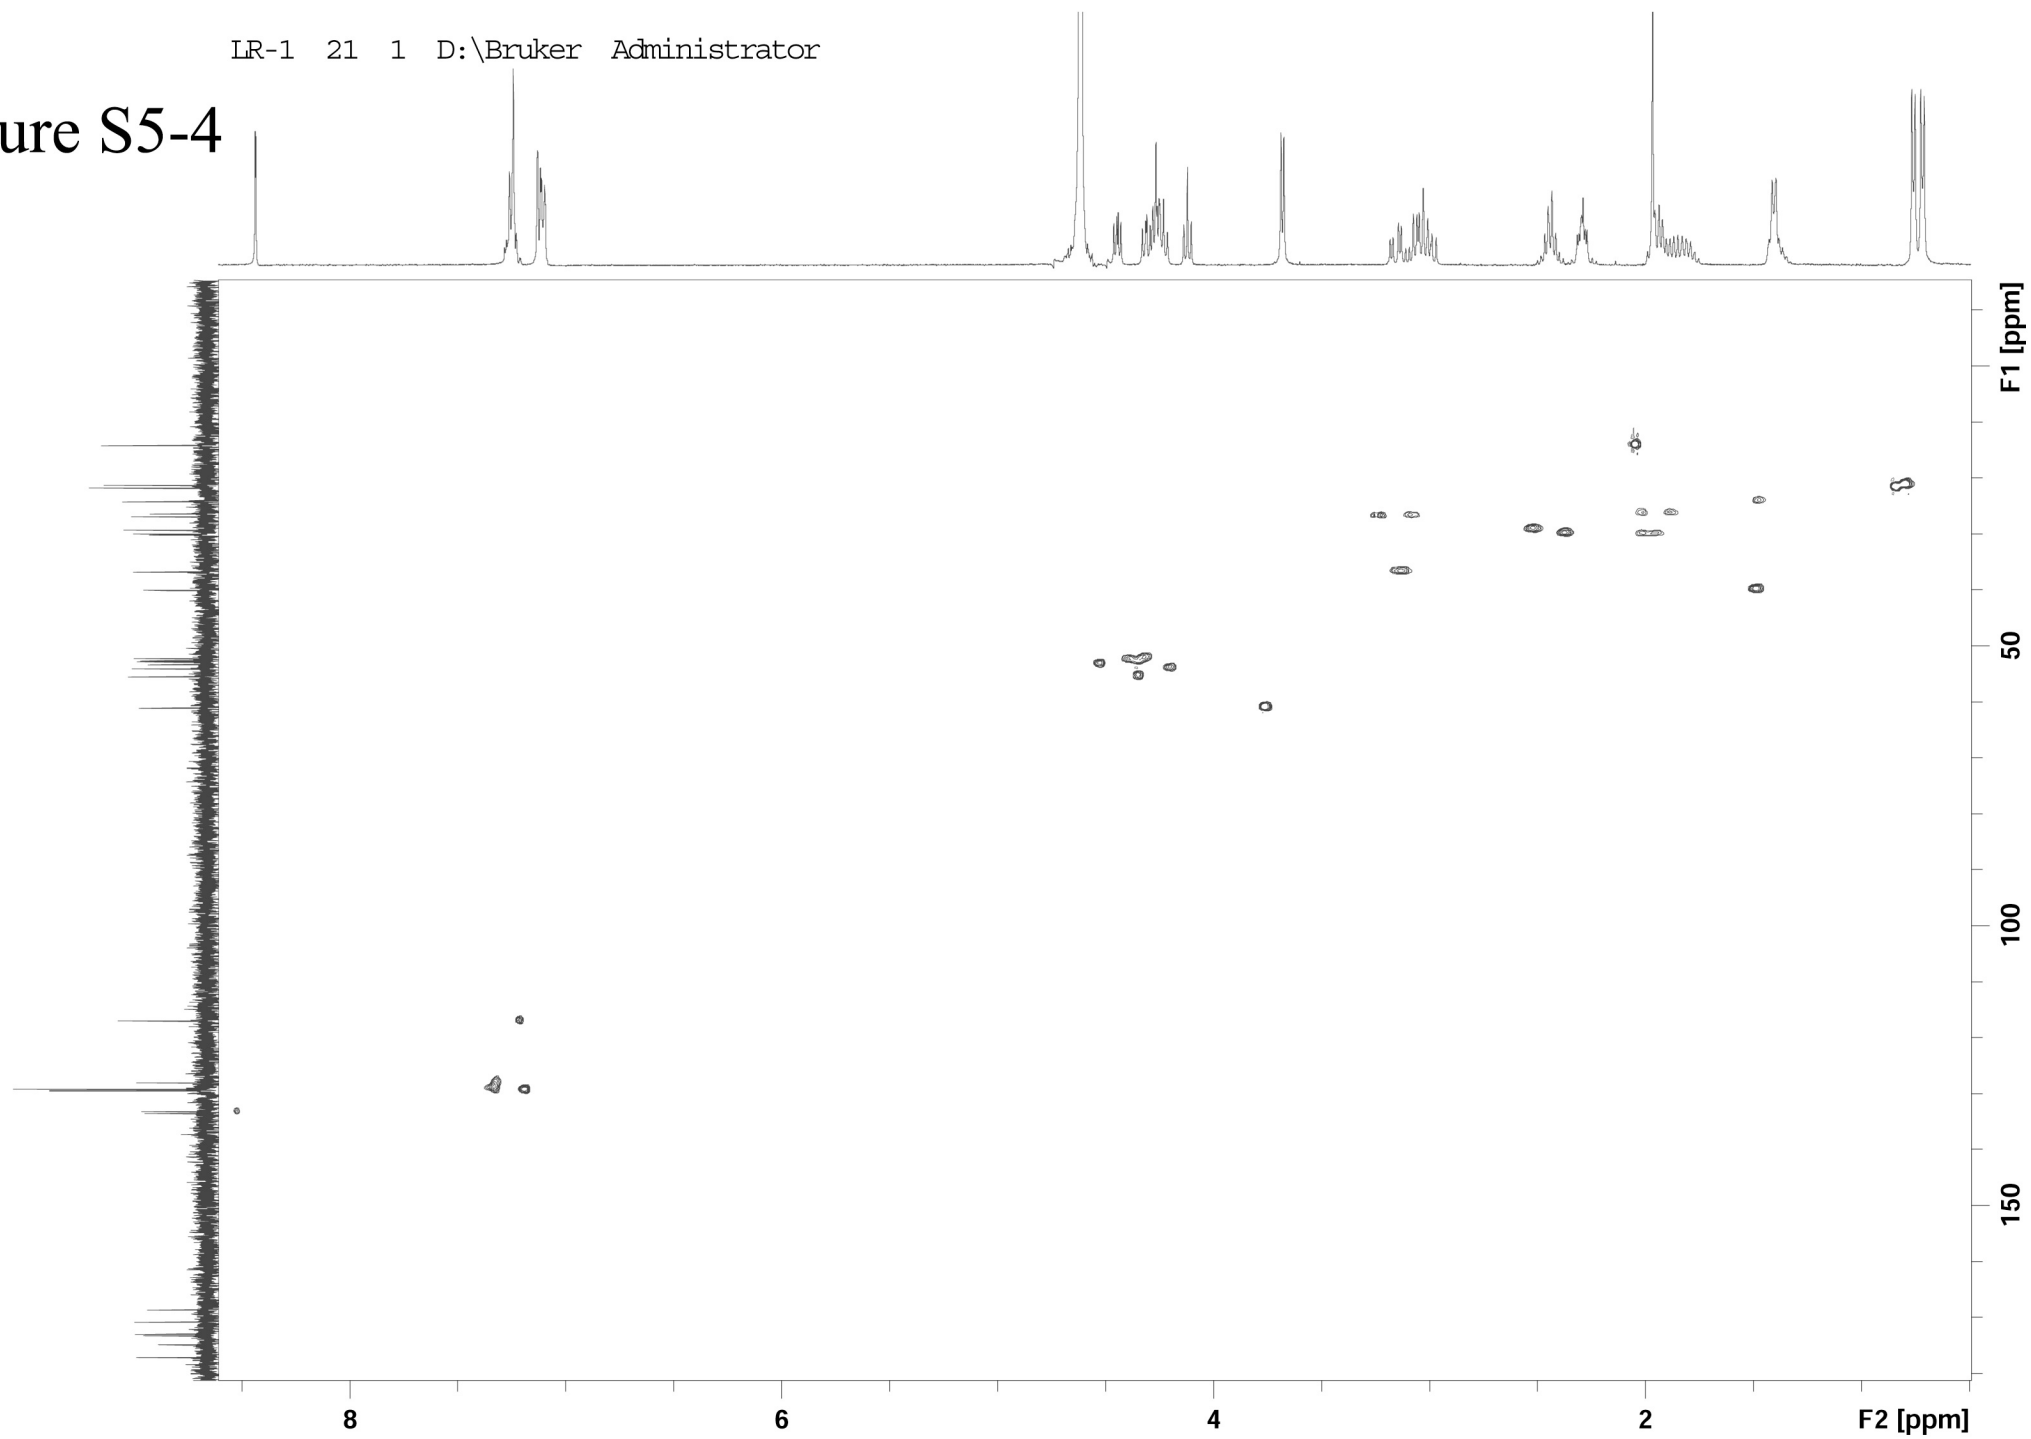

Figure S5-5

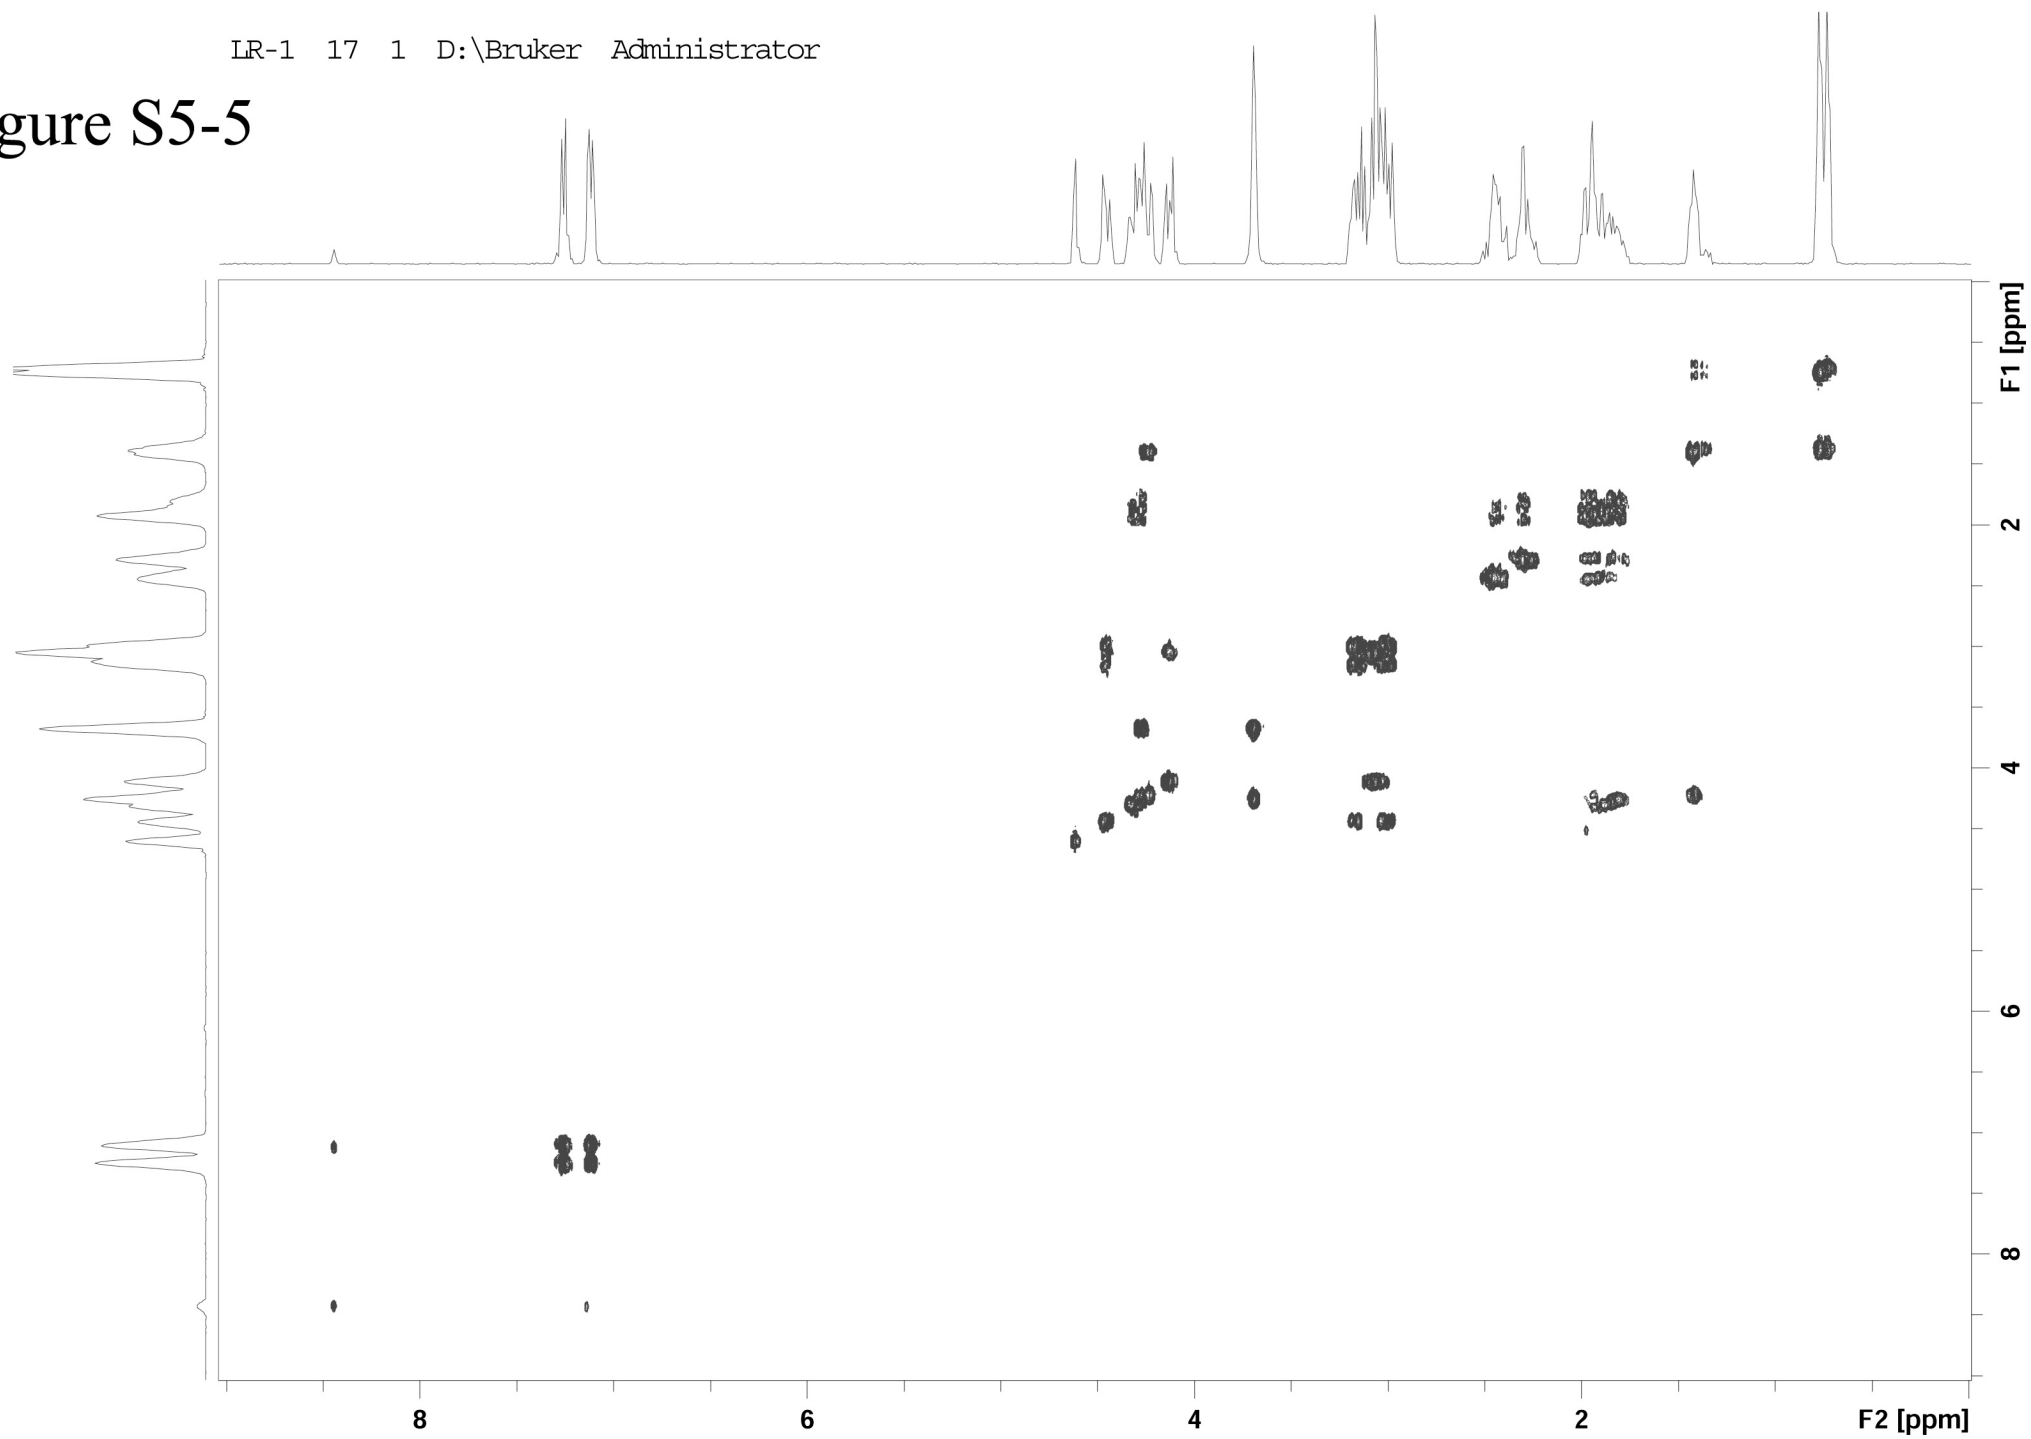

Figure S5-6

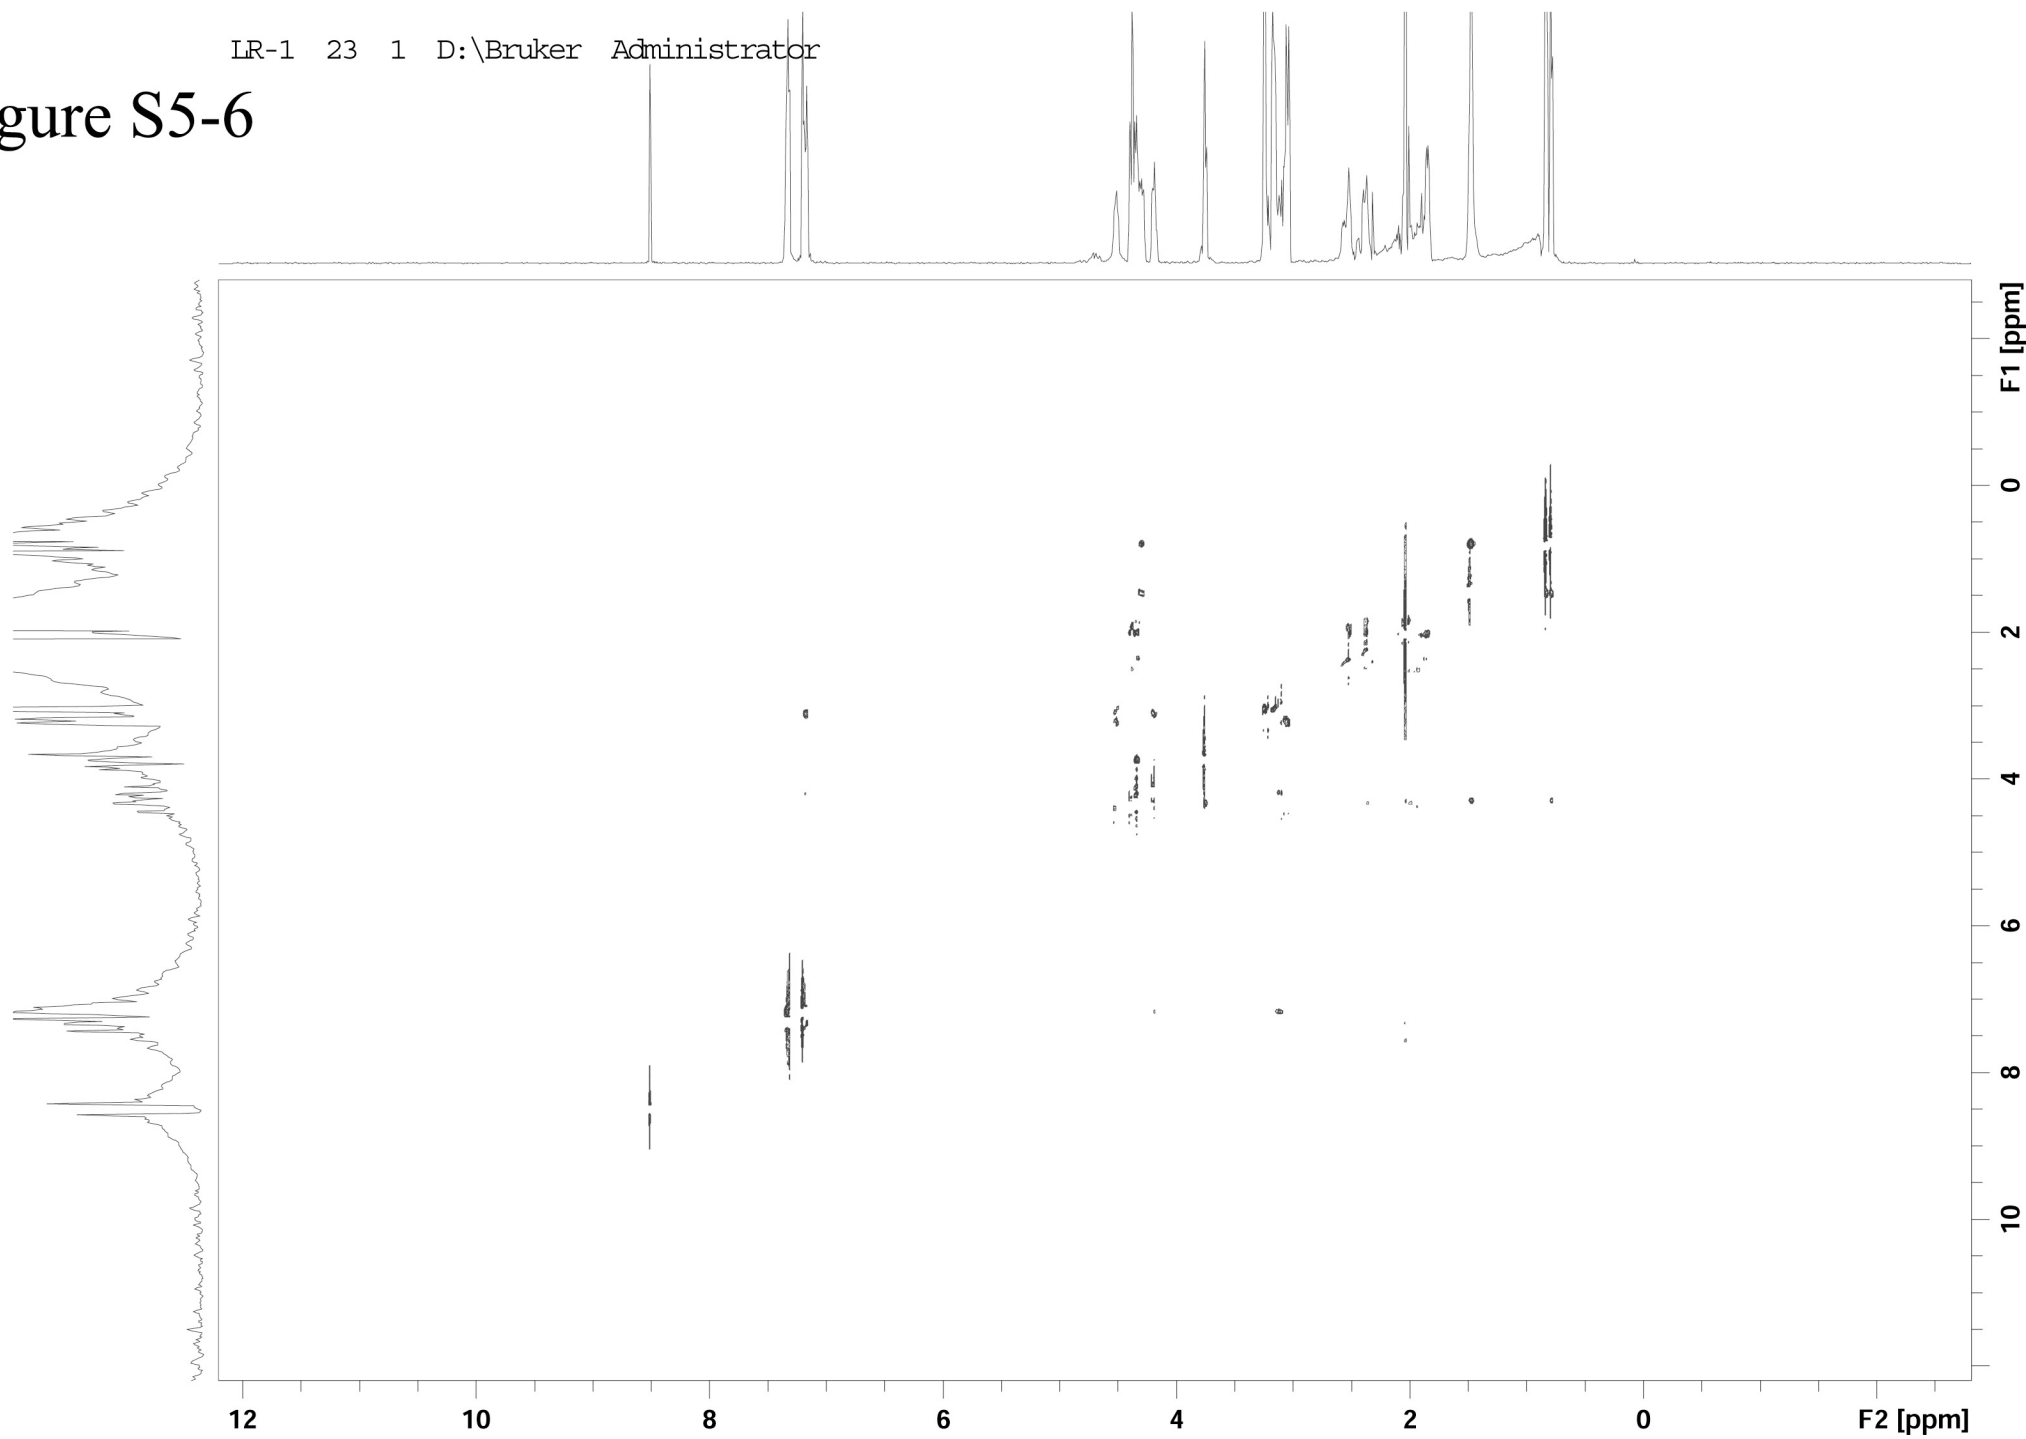

Supplement: s1 [file s1]
